# Supplementary material for: Epigenetic Small Molecules Rescue Nucleocytoplasmic Transport and DNA Damage Phenotypes in C9ORF72 ALS/FTD
Source: MDPI journal article supplement (doi:10.3390/brainsci11111543), 2021-11-20
Supplement: s1 [file s1]

**Table S1. Antibody applications and dilutions**

| <b>Antibody</b> | <b>Supplier</b> | <b>Catalog #</b> | <b>Dilution</b> | <b>Method</b> |
|-----------------|-----------------|------------------|-----------------|---------------|
| anti-PR         | ProteinTech     | 23979-1-AP       | 1:250           | IF            |
| anti-GR         | ProteinTech     | 23978-1-AP       | 1:100           | IF            |
| anti-GA         | ProteinTech     | 24492-1-AP       | 1:100           | IF            |
| anti-γH2AX      | Abcam           | ab11174          | 1:1000          | IF            |
| anti-Tuj1       | Abcam           | ab78078          | 1:1000          | IF            |
| anti-ISL1       | Abcam           | ab20670          | 1:500           | IF            |
| anti-TDP-43     | ProteinTech     | 10782-2-AP       | 1:250           | IF            |
