# Supplementary material for: Epigenetic Small Molecules Rescue Nucleocytoplasmic Transport and DNA Damage Phenotypes in C9ORF72 ALS/FTD
Source: MDPI journal article supplement (doi:10.3390/brainsci11111543), 2021-11-20
Supplement: s1 [file s1]

**Table S3. Compound Libraries**

| <b>Name</b>                                        | <b>Supplier</b> | <b>Catalog #</b> | <b># of compounds</b> |
|----------------------------------------------------|-----------------|------------------|-----------------------|
| LOPAC <sup>®</sup> 1280 - Small Scale              | Sigma-Aldrich   | LO4200-1EA       | 1280                  |
| SCREEN-WELL <sup>®</sup> FDA approved drug library | Enzo            | BML-2841         | 800                   |
| SCREEN-WELL <sup>®</sup> Natural Product library   | Enzo            | BML-2865         | 502                   |
| CTI Epigenetic Compound Library                    | N/A             | N/A              | 160                   |
| <b>Total Compounds</b>                             |                 |                  | <b>2742</b>           |
