# Supplementary material for: Epigenetic Small Molecules Rescue Nucleocytoplasmic Transport and DNA Damage Phenotypes in C9ORF72 ALS/FTD
Source: MDPI journal article supplement (doi:10.3390/brainsci11111543), 2021-11-20
Supplement: s1 [file s1]

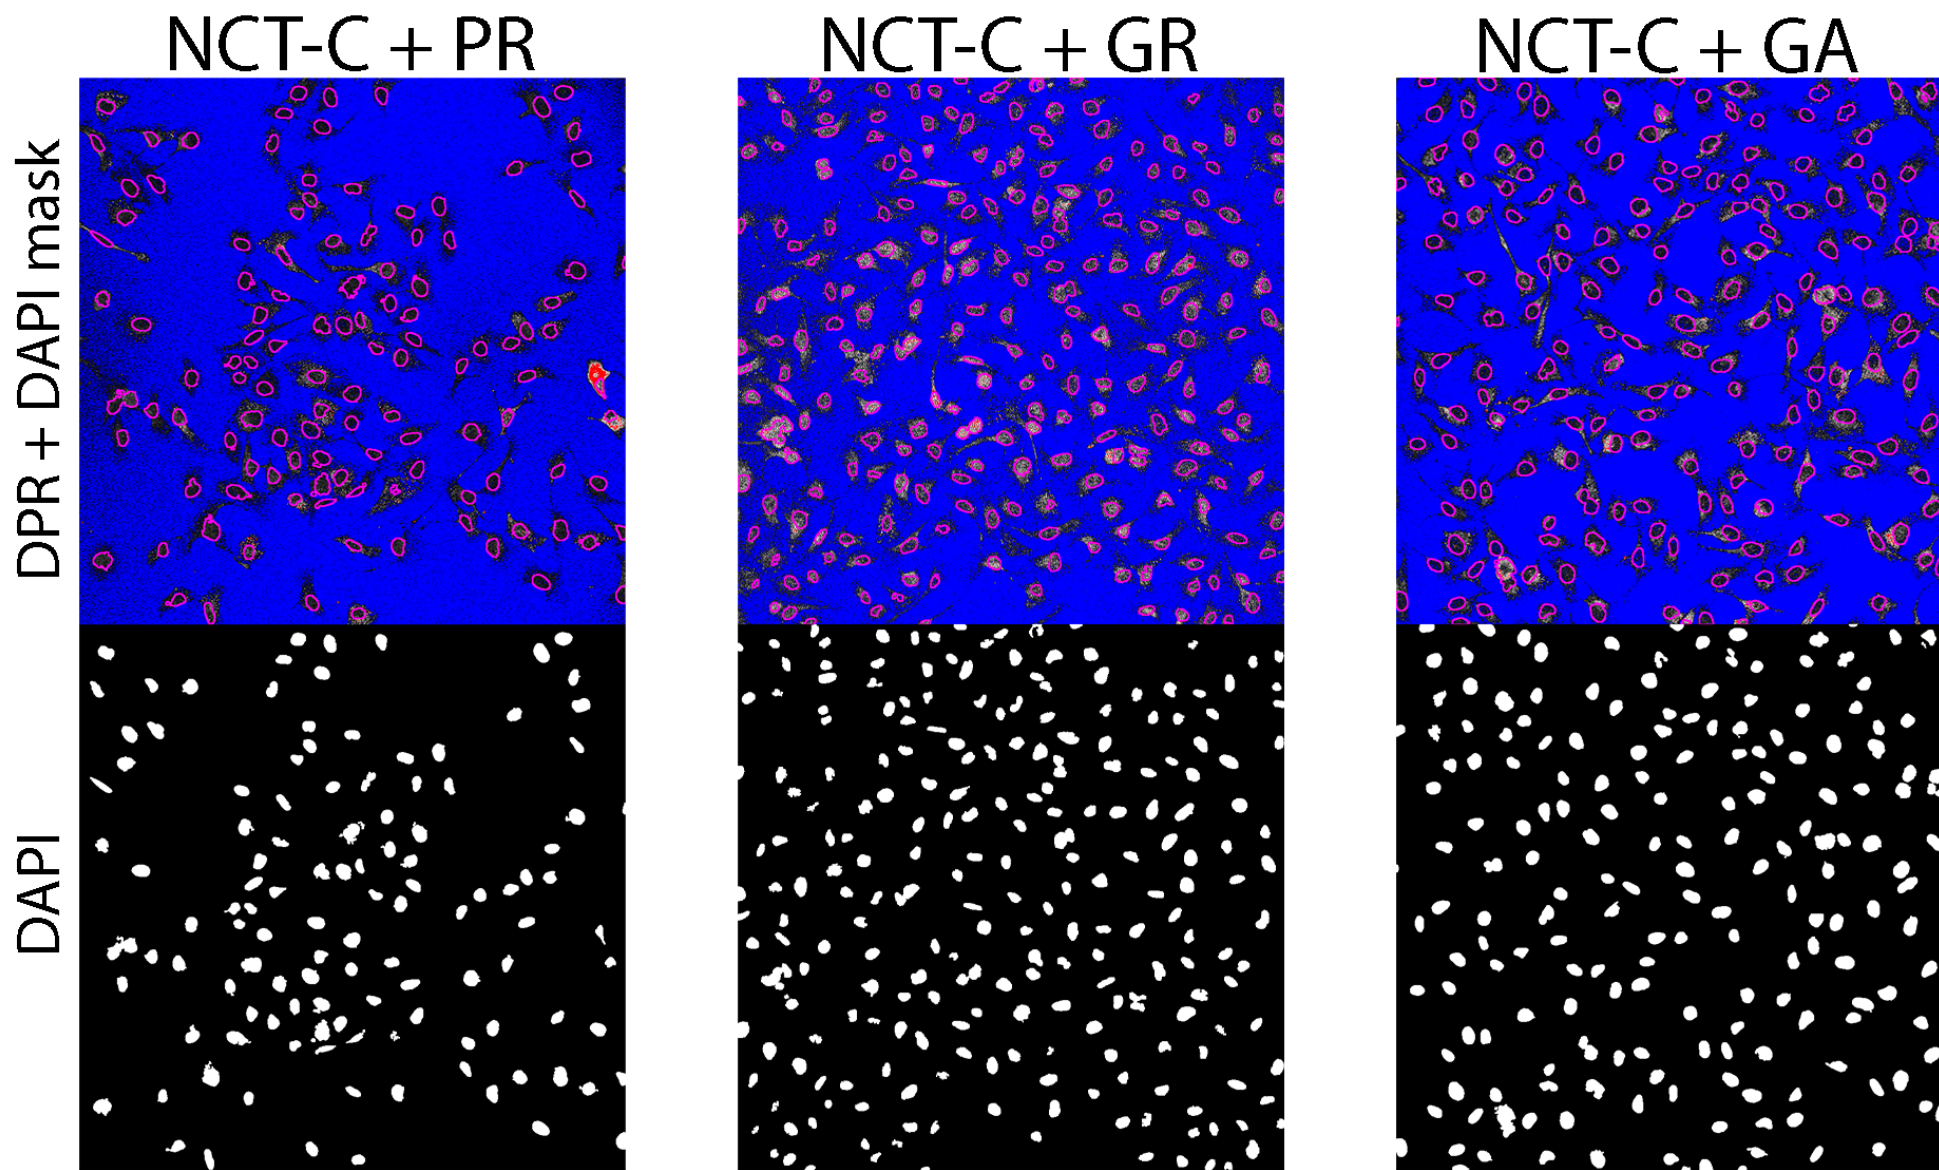

| Image    | av. nuclei intensity | av. cytoplasm intensity | t. nuclei intensity | t. cytoplasm intensity |
|----------|----------------------|-------------------------|---------------------|------------------------|
| NCT_C_PR | 13.445               | 10.3021                 | 410760.449          | 976026.758             |
| NCT_C_GR | 10.5866              | 6.4637                  | 487623.47           | 712430.68              |
| NCT_C_GA | 13.6998              | 17.0434                 | 682618.094          | 1535388.19             |
