# Supplementary material for: Epigenetic Small Molecules Rescue Nucleocytoplasmic Transport and DNA Damage Phenotypes in C9ORF72 ALS/FTD
Source: Brain Sci. 2021 Nov 20;11(11):1543. doi: 10.3390/brainsci11111543 (PMC8616043; doi:10.3390/brainsci11111543)
Supplement: Supplementary file 1 [file brainsci-11-01543-s001.zip]

Archive with 14 entries (14 files):
- Figure S1.pdf
- Figure S2.pdf
- Figure S3.pdf
- Figure S4.pdf
- Figure S5.pdf
- Figure S6.pdf
- Figure S7.pdf
- Figure S8.pdf
- Figure S9.pdf
- Table S1.pdf
- Table S2.xlsx
- Table S3.pdf
- Table S4.xlsx
- Table S5.xlsx
