# Supplementary material for: Epigenetic Small Molecules Rescue Nucleocytoplasmic Transport and DNA Damage Phenotypes in C9ORF72 ALS/FTD
Source: Brain Sci. 2021 Nov 20;11(11):1543. doi: 10.3390/brainsci11111543 (PMC8616043; doi:10.3390/brainsci11111543)
Supplement: Supplementary file 1 [file brainsci-11-01543-s001.zip › Table S2.xlsx]

## Sheet: Stats
Table S2. p-values for statistical tests for Figure 3 and Figure 4
Biosensor	vs pcDNA	vs LMB	vs PR	vs GR	vs GA
NCT-C
PR	0.000273425	0.00901883		0.9488	0.9776	Notes: All DPRs increased GFP intensity in the nucleus compared to empty vector. PR and GA caused less GFP accumulation in the nucleus compared to LMB, suggesting some import inhibition. The DPRs did not significantly differ in nuclear GFP intensity between each other.
GR	0.00184608	0.143127	0.9488		0.8659
GA	0.00150592	0.0173345	0.9776	0.9776
NCT-01
PR	3.00608e-08	1.33473e-05		0.4053	0.0001	Notes: All DPRs increased GFP intensity in the nucleus compared to empty vector. PR and GR caused more GFP accumulation in the nucleus compared to LMB, suggesting some import facilitation. GA caused less GFP accumulation in the nucleus compared to LMB, suggesting some import inhibition. The GA caused significantly less nuclear GFP intensity compared to PR and GR.
GR	1.099e-08	3.16749e-05	0.4053		0.0022
GA	2.51201e-10	1.43497e-05	0.0001	0.0022
NCT-02
PR	1.24013e-05	0.000573483		0.372	0.9939	Notes: All DPRs increased GFP intensity in the nucleus compared to empty vector. All DPRs caused less GFP accumulation in the nucleus compared to LMB, suggesting some import inhibition. The DPRs did not significantly differ in nuclear GFP intensity between each other.
GR	0.0209092	0.00515408	0.372		0.317
GA	8.71378e-05	0.00477077	0.9939	0.317
NCT-03
PR	0.000251228	0.14447		0.3706	0.6141	Notes: All DPRs increased GFP intensity in the nucleus compared to empty vector. GA caused less GFP accumulation in the nucleus compared to LMB, suggesting some import inhibition. The DPRs did not significantly differ in nuclear GFP intensity between each other.
GR	0.00852971	0.110438	0.3706		0.9136
GA	2.75323e-05	0.00584779	0.6141	0.9136
NCT-04
PR	1.82039e-05	0.000184512		0.0001	0.0001	Notes: All DPRs increased GFP intensity in the nucleus compared to empty vector. All DPRs caused more GFP accumulation in the nucleus compared to LMB, suggesting some import facilitation. The PR did cause significantly less nuclear GFP intensity compared to GR and GA.
GR	5.64789e-06	2.00798e-05	0.0001		0.8761
GA	0.00111472	0.00313768	0.0001	0.8761
NCT-05
PR	0.000364419	0.0251404		0.2707	0.3661	Notes: All DPRs increased GFP intensity in the nucleus compared to empty vector. PR caused more GFP accumulation in the nucleus compared to LMB, suggesting some import facilitation. The DPRs did not significantly differ in nuclear GFP intensity between each other.
GR	0.0083841	0.450903	0.2707		0.9799
GA	0.00242723	0.534387	0.3661	0.9799
NCT-06
PR	0.00108281	0.115118		0.6721	0.2818	Notes: All DPRs increased GFP intensity in the nucleus compared to empty vector. GA caused more GFP accumulation in the nucleus compared to LMB, suggesting some import facilitation. GA did cause significantly more nuclear GFP intensity compared to PR and GR.
GR	0.00197157	0.98553	0.6721		0.0482
GA	5.10479e-05	0.00133045	0.2818	0.0482
NCT-07
PR	3.63383e-09	5.70049e-09		0.0008	0.5784	Notes: All DPRs increased GFP intensity in the nucleus compared to empty vector. PR and GA caused less GFP accumulation in the nucleus compared to LMB, suggesting some import inhibition. GR caused more GFP accumulation in the nucleus compared to LMB, suggesting some import facilitation. GR did cause significantly more nuclear GFP intensity compared to PR and GA.
GR	5.9748e-06	0.0034733	0.0008		0.0093
GA	1.099e-08	1.14832e-05	0.5784	0.0093
NCT-08
PR	3.55449e-06	2.28785e-09		0.9145	0.0182	Notes: All DPRs increased GFP intensity in the nucleus compared to empty vector. All DPRs caused less GFP accumulation in the nucleus compared to LMB, suggesting some import inhibition. GA did cause significantly more nuclear GFP intensity compared to PR.
GR	0.000286024	5.0318e-06	0.9145		0.0567
GA	1.68623e-05	0.0346325	0.0182	0.0567
NCT-09
PR	2.5969e-07	1.51194e-08		0.9735	0.2026	Notes: All DPRs increased GFP intensity in the nucleus compared to empty vector. All DPRs caused less GFP accumulation in the nucleus compared to LMB, suggesting some import inhibition. The DPRs did not significantly differ in nuclear GFP intensity between each other.
GR	1.68623e-05	7.22764e-07	0.9735		0.2966
GA	0.00244395	4.33552e-10	0.2026	0.2966
NCT-10
PR	1.69696e-09	0.000230937		0.009	0.0001	Notes: All DPRs increased GFP intensity in the nucleus compared to empty vector. PR caused more GFP accumulation in the nucleus compared to LMB, suggesting some import facilitation. GR and GA caused less GFP accumulation in the nucleus compared to LMB, suggesting import inhibition. PR did cause significantly more nuclear GFP intensity compared to GR and GA.
GR	1.05642e-07	4.91333e-06	0.009		0.2118
GA	2.64979e-06	4.57712e-09	0.0001	0.2118
NCT-11
PR	0.0173482	0.163311		0.0001	0.0001	Notes: All DPRs increased GFP intensity in the nucleus compared to empty vector. GR and GA caused less GFP accumulation in the nucleus compared to LMB, suggesting some import inhibition. PR did cause significantly more nuclear GFP intensity compared to GR and GA.
GR	7.48954e-09	1.23988e-09	0.0001		0.8343
GA	1.39498e-09	2.96999e-12	0.0001	0.8343
NCT-13
PR	1.18212e-05	0.0461152		0.0001	0.4039	Notes: All DPRs increased GFP intensity in the nucleus compared to empty vector. PR caused less GFP accumulation in the nucleus compared to LMB, suggesting some import inhibition. GR caused more GFP accumulation in the nucleus, suggesting some import facilitation. GR did cause significantly more nuclear GFP intensity compared to PR and GA.
GR	1.13886e-06	4.35046e-05	0.0001		0.0001
GA	1.05642e-07	0.379475	0.4039	0.0001
NCT-14
PR	1.18212e-05	0.436017		0.8464	0.0064	Notes: All DPRs increased GFP intensity in the nucleus compared to empty vector. GA caused less GFP accumulation in the nucleus compared to LMB, suggesting some import inhibition. GA did cause significantly less nuclear GFP intensity compared to PR and GR.
GR	3.25142e-05	0.379448	0.8464		0.0009
GA	7.48954e-09	9.86297e-12	0.0064	0.0009
NCT-15
PR	2.06094e-07	1.24588e-06		0.0018	0.0909	Notes: All DPRs increased GFP intensity in the nucleus compared to empty vector. All DPRs caused mroe GFP accumulation in the nucleus compared to LMB, suggesting some import facilitation. GR did cause significantly less nuclear GFP intensity compared to PR and GA.
GR	9.32985e-06	0.000108044	0.0018		0.0001
GA	1.29607e-06	1.28757e-05	0.0909	0.0001
NCT-ALYREF
PR	0.9139			0.6677	0.9999	Notes: None of the DPRs increased GFP intensity in the nucleus compared to empty vector. The DPRs did not significantly differ in nuclear GFP intensity between each other.
GR	0.2469		0.6677		0.708
GA	0.8829		0.9999	0.708
DPR vs pcDNA3.1+ and DPRs vs LMB was calculated by Student's t-test, two-tailed distribution with unequal variance. Differences between DPRs within the same biosensor were calculated by two-way ANOVA with multiple comparisons using Tukey's correction.							*
							**
							***
							****
