# Supplementary material for: Epigenetic Small Molecules Rescue Nucleocytoplasmic Transport and DNA Damage Phenotypes in C9ORF72 ALS/FTD
Source: Brain Sci. 2021 Nov 20;11(11):1543. doi: 10.3390/brainsci11111543 (PMC8616043; doi:10.3390/brainsci11111543)
Supplement: Supplementary file 1 [file brainsci-11-01543-s001.zip › Table S4.xlsx]

## Sheet: Sheet1
Table S4: Results from the primary screen (Related to Figure 5)
Z Score	% Cell Viability	Compound	Therapeutic Class/Target	Library
-3.48801	0.569203	IOX2	IOX2 is a potent inhibitor of HIF-1 prolyl hydroxylase-2 (PHD2) with IC50 of 21 nM.	Epigenetic
-3.20513	0.594928	CI-994	HDAC inhibitor	Epigenetic
-3.18682	0.834322	Amantadine·HCl	Amantadine is a weak, non-competitive antagonist of the NMDA receptor, which increases dopamine release and prevents dopamine reuptake.	FDA
-3.17043	0.776189	UNC1999	EZH1 and EZH2 Inhibitor, with higher affinity for EZH2 (IC50 2nM EZH@; IC50 45 nM EZH1)	Epigenetic
-3.04673	0.790606	WDR5-C47	highly potent and selective antagonist of WDR5-MLL interaction with an IC 50 ~0.3 µM	Epigenetic
-3.00665	0.492391	PCI-24781 (Abexinostat)	Abexinostat (PCI-24781) is a novel pan-HDAC inhibitor mostly targeting HDAC1 with Ki of 7 nM, modest potent to HDACs 2, 3, 6, and 10 and greater than 40-fold selectivity against HDAC8	Epigenetic
-2.96955	0.71023	EPZ-6438	Tazemetostat (EPZ-6438) is a potent, and selective EZH2 inhibitor with Ki and IC50 of 2.5 nM and 11 nM in cell-free assays, exhibiting a 35-fold selectivity versus EZH1 and >4,500-fold selectivity relative to 14 other HMTs	Epigenetic
-2.96077	0.771538	RVX-208	a selective antagonist of BET bromodomains, binding with 10-100-fold higher affinity for BD2 (IC50 = 0.04-0.28 µM) over BD1 (IC50 = 1.8-3.1 µM)	Epigenetic
-2.95583	0.727174	Phenylbutyrate·Na	a chemical chaperone that has been shown to rescue the trafficking of misfolded proteins. Weak HDAC inhibitor (IC50 = 0.4 mM), which results in cell cycle arrest, differentiation, and/or apoptosis of various tumors.	Epigenetic
-2.88872	0.855714	RG2833 (RGFP109)	HDAC inhibitor (HDAC1 and HDAC3)	Epigenetic
-2.81972	0.730509	Piceatannol	SIRT1 activator. Inhibits TNF-induced NF-κB activation	Epigenetic
-2.60752	0.649638	CTPB	amide derivative that selectively activates the histone acetyltransferase (HAT) p300, with maximal activation at 275 µM.1 It directly binds p300.2 CTPB does not alter PCAF HAT or histone deacetylase activity.1 It dose-dependently increases the acetylation of histones H3 and H4, with maximal effect at 200 µM.	Epigenetic
-2.60665	0.656522	UNC 0224	Potent methyltransferase G9a and GLP inhibitor	Epigenetic
-2.60422	0.505435	Droxinostat	HDAC inhibitor	Epigenetic
-2.58487	0.729157	Resveratrol	SIRT1 activator. Cyclooxygenase inhibitor	Epigenetic
-2.55984	0.58913	APHA	A class I and II HDAC inhibitor	Epigenetic
-2.49972	0.711131	UNC1215	a potent, selective antagonist of L3MBTL3	Epigenetic
-2.4863	0.539493	SBI-7673	a compound that is structurally similar to active-site directed nicotinamide phosphoribosyltransferase (NAMPT) inhibitors and blocks binding of these inhibitors to NAMPT, increasing production of nicotinamide mononucleotide (NMN), the predominant NAD+ precursor in mammalian cells	Epigenetic
-2.47235	0.444344	GSK-J5	GSK-J5 is a pyridine regio-isomer of GSK-J4. Like GSK-J4, this isomer is cell-permeable and hydrolyzed to a free base.3 However, the free base is a weak inhibitor of JMJD3 (IC50 > 100 μM)	Epigenetic
-2.40662	0.931985	Prazosin·HCl	antagonist of α1-adrenergic receptors (α1-ARs).1,2 It selectively binds to α1-ARs with Ki values of 0.2, 0.25, and 0.32 nM for the human recombinant α1A-, α1B-, and α1D-ARs, respectively, over α2-ARs (Kis = 340 and 3.7 nM in α2A-AR-expressing HT-29 cells and α2B-AR-expressing NG108 cells, respectively).3,4 It also binds to melatonin receptor 3 (MT3) in hamster brain membranes (IC50 = 7.8 nM).5 Pr…	FDA
-2.39969	0.566667	Dihydroergotamine Mesylate	an ergot derivative with agonistic activity for alpha-adrenergic, serotonergic, and dopaminergic receptors	FDA
-2.38017	0.573231	Valproic acid	HDAC inhibitor	Epigenetic
-2.36188	0.659058	Guanabenz Acetate	orally bioavailable, acetate salt form of guanabenz, a centrally-acting alpha-2 adrenergic receptor agonist	FDA
-2.35502	0.731411	Procainamide·HCl	A class Ia antiarrhythmic drug that is structurally-related to PROCAINE. Procainamide hydrochloride is a sodium channel blocker and Class IA anti-arrhythmic. It has also been shown to Inhibit DNA methyltransferase and modulate epigenetic regulation of gene expression.	FDA
-2.33561	0.627536	Salermide	SIRT1 and SIRT2 inhibitor	Epigenetic
-2.32938	0.485804	I-CBP 112	Selective CBP/p300 BRD inhibitor	Epigenetic
-2.31464	0.544565	Salbutamol Hemisulfate	β2 adrenoceptor agonist with short acting bronchodilation and anti-inflammatory effects.	FDA
-2.3048	0.466877	UNC0642	Potent and selective G9a and GLP inhibitor	Epigenetic
-2.27708	0.629348	NCH-51	HDAC inhibitor	Epigenetic
-2.26792	0.639855	MC-1293	An inhibitor of HDAC1 and maize histone deacetylase HD2	Epigenetic
-2.26208	0.464855	EP-336		Epigenetic
-2.25629	0.756647	Delphinidin chloride	Natural vasorelaxant and inhibitor of EGFRs and HATs	Epigenetic
-2.22705	0.799009	PFI-3	Potent and selective SMARCA2/4 and polybromo 1 inhibitor	Epigenetic
-2.22169	0.56413	ITSA-1	A suppressor of HDAC inhibitors	Epigenetic
-2.21491	0.794791	Betaxolol·HCl	Selective β1 antagonist	FDA
-2.21016	0.526449	LSD1-C76	most potent and selective Lysine Specific Demethylase-1 (LSD1) inhibitor	Epigenetic
-2.20888	0.474538	Cl-Amidine	is an inhibitor of protein arginine deiminases (PAD; IC50s = 0.8, 6.2, and 5.9 µM for PAD1, PAD3, and PAD4 in vitro, respectively).1,2 It irreversibly inactivates all four PAD subtypes (kinact/KI = 37,000, 1,200, 2,000, and 13,000 M-1min-1 for PAD1-4, respectively) by covalently modifying an active site cysteine that is important for its catalytic activity. Cl-amidine dose-dependently decreases t…	Epigenetic
-2.20455	0.587681	Tranylcypromine hemisulfate	orally bioavailable, nonselective, irreversible, non-hydrazine inhibitor of both monoamine oxidase (MAO) and lysine-specific demethylase 1 (LSD1/BHC110), with antidepressant and anxiolytic activities, and potential antineoplastic activities.	Epigenetic
-2.09287	0.684092	GSK-J2	Inactive control of GSK J1 (IC50 > 100 μM for inhibition of JMJD3/UTX).	Epigenetic
-2.05	0.810603	Olmesartan	Olmesartan is an angiotensin II receptor blocker (sometimes called an ARB). Olmesartan is used to treat high blood pressure (hypertension) in adults and children at least 6 years old. It is sometimes given together with other blood pressure medications.	FDA
-2.0187	0.564669	CPTH2	HAT inhibitor	Epigenetic
-2.01253	0.268589	OLAPAR 1B	PARP inhibitor	Epigenetic
-1.99456	0.482199	Tenovin-1	A small molecule activator of p53	Epigenetic
-1.9811	0.666516	Entacapone	A reversible COMT inhibitor	Epigenetic
-1.97024	0.318478	RG 108	DNA methyltransferase inhibitor	Epigenetic
-1.95223	0.680036	GSK343	A selective, cell-permeable EZH2 inhibitor	Epigenetic
-1.90884	0.82223	Pilocarpine·HCl	Muscarinic agonist	FDA
-1.90839	0.526814	EPZ005687	A potent, selective inhibitor of EZH2	Epigenetic
-1.89326	0.659757	Sodium 4-Phenylbutyrate	a chemical chaperone that has been shown to rescue the trafficking of misfolded proteins. Weak HDAC inhibitor (IC50 = 0.4 mM), which results in cell cycle arrest, differentiation, and/or apoptosis of various tumors.	Epigenetic
-1.89239	0.735016	Aminoresveratrol sulfate	Resveratrol-3-O-sulfate is a metabolite of resveratrol.1 In U-937 cells stimulated with LPS, resveratrol-3-O-sulfate (1 µM) decreases the expression of IL-1α, IL-1β, and IL-6 and decreases the release of TNF-α and IL-6 to similar levels as resveratrol. It has antioxidant activity in a Trolox assay, dose-dependently decreases growth of Caco-2 colorectal adenocarcinoma cells, and induces apoptosis …	Epigenetic
-1.87184	0.852168	Calcitriol	Vitamin D receptor (VDR) agonist	FDA
-1.86733	0.676449	Daminozide	also known as Alar, Kylar, B-NINE, DMASA, SADH, or B 995 – is a plant growth regulator	Epigenetic
-1.86072	0.598468	Sinefungin	A methyltransferase inhibitor	Epigenetic
-1.84972	0.56558	P 22077	USP7 inhibitor	Epigenetic
-1.84301	0.302174	CAY10591	A SIRT1 activator	Epigenetic
-1.81705	0.363227	Ellagic Acid	Polyphenolic antioxidant	Epigenetic
-1.816	0.493116	GSK-J4	Prodrug of a selective H3K27 histone demethylase inhibitor	Epigenetic
-1.81333	0.900077	SANT-2	A Smoothened receptor antagonist (inhibits hedgehog signaling)	LOPAC
-1.79632	0.604326	TC-H 106	Class I histone deacetylase inhibitor	Epigenetic
-1.79032	0.535507	AGK2	a potent, and selective SIRT2 inhibitor with IC50 of 3.5 μM that minimally affects either SIRT1 or SIRT3 at 10-fold higher levels.	Epigenetic
-1.75951	0.61413	Anacardic acid	Noncompetitive PCAF/p300 inhibitor	Epigenetic
-1.75212	0.403986	DZNep	Noncompetitive inhibitor of PCAF and p300 histone acetyltransferase (HAT) activity. Inhibits NF-κB activation. Also reported to selectively activate Aurora kinase A-mediated phosphorylation of histone H3 and to inhibit protein SUMOylation. Exhibits antitumor, antimicrobial and antioxidant activity. Also promotes cardiomyocyte differentiation from mESCs.	Epigenetic
-1.7033	0.821757	Ibandronate sodium	A bisphosphonate bone resorption inhibitor	LOPAC
-1.69431	0.660207	SRT1720	A selective, potent SIRT1 activator	Epigenetic
-1.67302	0.783452	Guanfacine·HCl	α2A agonist	FDA
-1.66276	0.846091	Metformin·HCl	Antidiabetic agent; lowers plasma glucose levels and improves insulin sensitivity. Inhibits hepatic gluconeogenesis via activation of the LKB1/AMPK pathway. Displays antiproliferative effects in cancer cell lines via inhibition of mitochondrial complex I (MRC-1). Activates the aPKC-CBP pathway in neural precursors to promote neurogenesis. Activates autophagy. Identified by chemoinformatics as tar…	FDA
-1.65887	0.803893	BIA 2-093	A sodium channel blocker	LOPAC
-1.63523	0.860582	Bromocriptine Mesylate	A dopamine receptor agonist	FDA
-1.62525	0.529968	NU 9056	Inhibitor of KAT5 (Tip60)	Epigenetic
-1.61585	0.818778	CGP-20712 methanesulfonate	Highly potent and selective β1 antagonist	LOPAC
-1.60692	0.744479	Curcumin	Antitumor, anti-inflammatory and antioxidant agent. Downregulates expression of reactive-oxygen-generating enzymes (cyclooxygenase, lipoxygenase, iNOS), TNFα, IL-1, IL-6, PKC, EGFR, NF-κB, IκB kinase and more. Upregulates expression of PPARγ, p53, Nrf2. Also displays antimicrobial, antidiabetic neuro- and cardioprotective properties in vivo.	Epigenetic
-1.57338	0.805661	(-)-alpha-Methyl norepinephrine	catecholamine sympathomimetic used as a topical nasal decongestant and vasoconstrictor in dentistry in the United States, (usually in a pre-mixed solution with local anesthetics, such as mepivacaine).Corbadrine is also a metabolite of the antihypertensive drug methyldopa, and plays a role in its pharmacology and effects.	LOPAC
-1.56045	0.931282	Naloxone hydrochloride	Non-selective opioid antagonist	LOPAC
-1.55261	0.554754	Entinostat (MS-275)	HDAC (Class I) inhibitor	Epigenetic
-1.54471	1.05407	Protriptyline hydrochloride	a tricyclic secondary amine with antidepressant property. Protriptyline hydrochloride blocks the re-uptake of norepinephrine and serotonin by nerve terminals, thereby increasing available norepinephrine and serotonin. Protriptyline does not block dopamine transport but may have an indirect dopamine-facilitating effect through interactions of increased peri-synaptic abundance of norepinephrine, pa…	LOPAC
-1.53988	0.367391	NSC-3852	HDAC inhibitor	Epigenetic
-1.52502	0.318733	Mithramycin A	A DNA-binding antitumor antibiotic	Natural
-1.49851	0.300135	PCI 34051	A potent, selective HDAC8 inhibitor	Epigenetic
-1.49621	0.790464	Meloxicam	A selective COX-2 inhibitor	FDA
-1.49486	0.41087	SAHA	HDAC inhibitor (inhibits classes I, II and IV) and arrests cell growth	Epigenetic
-1.49305	0.460916	Prostaglandin E1	Major endogenous prostanoid. Binds with high affinity to EP1, EP2, EP3 and EP4 receptors (Kd values range between ~ 1 - 10 nM). Influences a wide range of processes including inflammation, smooth muscle relaxation, fertility and gastric mucosal integrity. Regulates vertebrate hematopoietic stem cell (HSC) homeostasis.	Natural
-1.49282	0.993145	R(+)-3PPP hydrochloride	D2 dopamine receptor agonist. Also functions as σ1 receptor antagonist with essentially no affinity for the phencylidine site on the NMDA receptor.	LOPAC
-1.48745	0.378785	Dactinomycin (= Actinomycin D)	Inhibits RNA polymerase	FDA
-1.46662	0.603876	(R)PFI-2	a histone-lysine N-methyltransferase (HKMT) inhibitor selective for SETD7 (also known as SET9). (R)-PFI-2 has an IC50 value of 2 nM and 1000-fold selectivity over other methyltransferases and other non-epigenetic targets	Epigenetic
-1.43025	0.340243	UNC 0638	Selective G9a and GLP inhibitor	Epigenetic
-1.41389	0.850117	Oltipraz metabolite M2	inhibit liver steatosis by inhibiting lipogenesis and enhancing mitochondrial function, including fuel oxidation. Oltipraz metabolite M2 acts as a potent inhibitor of LXRa transcriptional activity, and also AMPK activator inducing the phosphorylation of AMPK.	LOPAC
-1.41342	0.262129	Gossypol	Proapoptotic; downregulates Bcl-2 and Bcl-XL	Natural
-1.40477	0.814166	6(5H)- Phenanthridinone	An inhibitor of PARP1 and 2	LOPAC
-1.39895	0.417305	PFI 1	BET bromodomain inhibitor	Epigenetic
-1.38461	0.321767	5-Iodotubercidin	Potent adenosine kinase inhibitor; also inhibits nucleoside transporters and a range of other kinases	Epigenetic
-1.38135	0.205498	PBIT	JARID1 (Jumonji AT-Rich Interactive Domain 1) inhibitor	Epigenetic
-1.3739	0.805912	Tetradecylthioacetic acid	PPARα agonist; known to modulate lipid homeostasis. TTA can increase fatty acid oxidation and ketogenesis, which can subsequently prevent adiposity and insulin resistance. Furthermore, TTA can enhance cardiac functions during experimental heart failure.	LOPAC
-1.36705	0.207301	Nexturastat A	A potent, cell-permeable HDAC6 inhibitor	Epigenetic
-1.36338	0.699865	MC 1568	A selective class IIa HDAC inhibitor	Epigenetic
-1.357	0.546377	AK-7	An inhibitor of SIRT2	Epigenetic
-1.35355	0.807892	Methazolamide	A carbonic anhydrase inhibitor	LOPAC
-1.35026	0.765498	Albuterol hemisulfate	a β2 adrenoceptor agonist with short acting bronchodilation and anti-inflammatory effects. It relaxes the airway smooth muscles and inhibits bronchoconstriction induced by adenosine-5′ -monophosphate (AMP).	LOPAC
-1.34673	0.823186	Nimodipine	An inhibitor of L-type calcium channels	FDA
-1.33886	0.837677	Dofetilide	An antiarrythmic agent that inhibits potassium channels	FDA
-1.33855	0.89943	Rosiglitazone	A selective PPARγ agonist	FDA
-1.32865	0.374042	Plumbagin	A natural naphthoquinone; causes the generation of reactive oxygen species and induces apoptosis in cancer cells. It activates signaling through Nrf2 and the antioxidant response element, inducing the expression of Nrf2 target genes, including NQO1 and heme oxygenase-1 in cultured neuronal cells. Also inhibits NADPH oxidase 4 in a time- and dose-dependent manner. It can be protective against pero…	Epigenetic
-1.32456	0.602524	Hydralazine	An antihypertensive agent	Epigenetic
-1.3221	0.851199	Levothyroxine·Na	A synthetic form of thyroxine	FDA
-1.31544	0.791163	CGS-12066A maleate	a SR-1B (5-HT1B serotonin receptor) agonist.	LOPAC
-1.31511	0.816424	Tirofiban hydrochloride monohydrate	a potent non-peptide, glycoprotein IIb/IIIa inhibitor. Blocks platelet aggregation and thrombus formation.	LOPAC
-1.30736	0.372642	Radicicol	Hsp90 inhibitor. Antifungal antibiotic	Natural
-1.30183	0.835751	STF-31	A Glut1 inhibitor	LOPAC
-1.2957	0.673913	SGC0946	A potent inhibitor of DOT1L	Epigenetic
-1.28707	0.841884	Ketoconazole	A triazole antifungal agent	FDA
-1.28118	0.778778	Gefitinib	An EGFR inhibitor	FDA
-1.28112	0.847808	Riluzole·HCl	An inhibitor of glutamatergic transmission	FDA
-1.26913	0.249275	BML-210	A potent, synthetic HDAC inhibitor	Epigenetic
-1.26262	0.426318	IOX 1	histone demethylase JMJD inhibitor	Epigenetic
-1.26178	0.461957	A-366	A potent inhibitor of G9a	Epigenetic
-1.25443	0.792428	S(-)-Raclopride (+)-tartrate	Selective D2 dopamine receptor antagonist	LOPAC
-1.25393	0.72257	Sanguinarine chloride	A natural alkaloid with anti-inflammatory and anti-oxidant properties	LOPAC
-1.25174	0.754229	9,10-Dihydrolysergol	An O-acylated derivative of Lysergol and Dehydrolysergol-I; partial agonist and antagonist at 5-HT2A, 5-HT2C and 5-HT1B receptors, and at α1-andrenergic receptors.	Natural
-1.24933	0.78018	Flumazenil	Benzodiazepine antagonist	FDA
-1.24763	0.876424	Dilazep Dihydrochloride	Adenosine uptake inhibitor; Coronary and cerebral vasodilator, suppresses the effects of ischemia. Inhibitor of platelet aggregation and of membrane transport of nucleosides. Inhibits adenosine uptake.	LOPAC
-1.24545	0.400943	Rottlerin	Reported PKCδ inhibitor	Natural
-1.2403	0.853157	Trimipramine Maleate salt	Antidepressant; serotonin transport blocker that also blocks norepinephrine uptake.	LOPAC
-1.2274	0.792742	Ketoprofen	A non-selective COX inhibitor	LOPAC
-1.22091	0.819174	Tetraethylthiuram disulfide	An irreversible inhibitor of aldehyde dehydrogenase	LOPAC
-1.21969	0.861538	Nifedipine	An L-type calcium channel blocker	LOPAC
-1.21811	0.567391	Sirtinol	Inhibitor of sirtuin deacetylases	Epigenetic
-1.21561	0.889321	Leukadherin-1	An allosteric activator of CD11b/CD18	LOPAC
-1.21091	0.814025	Ritanserin	A potent 5-HT2A receptor antagonist	LOPAC
-1.20828	0.46496	Ryanodine	Ca2+ release inhibitor	Natural
-1.2069	0.80536	Tyrphostin AG 879	TrkA inhibitor	LOPAC
-1.20042	0.781268	Cilnidipine	Dual CaV1.x and CaV2.x blocker	LOPAC
-1.19517	0.801767	Zoledronic Acid Monohydrate	a bisphosphonate bone resorption inhibitor, an inhibitor of farnesyl diphosphate (FPP) synthase which results in downstream inhibition of osteoclast activity and reduced bone resorption and turnover. It has been used to treat postmenopausal osteoporosis, Paget′s disease, hypercalcemia, and along with cancer chemotherapy to treat bone damage caused by cancer that has spread to the bones.	FDA
-1.19469	0.341145	Ebselen	A peroxynitrite scavenger	Epigenetic
-1.19386	0.800427	Daurisoline	An alkaloid with diverse biological activities	LOPAC
-1.19039	0.816174	Anagrelide	A phosphodiesterase inhibitor with antiplatelet activity	FDA
-1.18905	0.879121	Nalidixic acid sodium salt	an inhibitor of bacterial DNA polymerase (DNA gyrase) and avian myeloblastoma virus reverse transcriptase. Inhibits nucleic acid and protein synthesis in Saccharomyces cerevisiae.	LOPAC
-1.18442	0.858712	Cetirizine 2HCl	Selective H1 antagonist	FDA
-1.18311	1.1112	Piribedil maleate salt	A direct dopamine agonist; may be selective for the D3 subtype; no significant affinity for D1 receptors.	LOPAC
-1.18001	0.431205	Celastrol	Inhibits TNF-α-induced NF-κB activation	Natural
-1.17875	0.819914	Dinoprostone	Major endogenous prostanoid (prostaglandin E2)	FDA
-1.1787	0.793269	Amiloride·HCl·2H2O	A pyrazine compound inhibiting sodium reabsorption through sodium channels in renal epithelial cells. This inhibition creates a negative potential in the luminal membranes of principal cells, located in the distal convoluted tubule and collecting duct. Negative potential reduces secretion of potassium and hydrogen ions. Amiloride is used in conjunction with diuretics to spare potassium loss.	FDA
-1.17255	0.83086	1-(m-Chlorophenyl)-biguanide hydrochloride	Very potent 5-HT3 serotonin receptor agonist.	LOPAC
-1.17241	0.893187	NCS-382	Antagonist of γ-hydroxybutyric acid	LOPAC
-1.17093	0.682808	GR-89696 fumarate	Subtype-selective κ agonist	LOPAC
-1.16166	0.233376	Betulinic acid	Antitumor and anti-HIV agent; activates NF-κB. Also TGR5 agonist	Natural
-1.15594	0.375959	Castanospermine	Glucosidases α and β inhibitor	Natural
-1.15522	0.828443	WB-4101 hydrochloride	α1A antagonist	LOPAC
-1.1468	0.79776	AGK2	Selective SIRT2 inhibitor	LOPAC
-1.13746	0.476629	L-Penicillamine	An S-nitrosothiol NO donor	Natural
-1.13615	0.829206	Lidocaine·HCl·H2O	interacts with voltage-gated Na+ channels in the nerve cell membrane and blocks the transient increase in permeability of excitable membranes to Na+. This prevents the generation and conduction of nerve impulses and produces a reversible loss of sensation. Lidocaine hydrochloride also exhibits class IB antiarrhythmic effects. The agent decreases the flow of sodium ions into myocardial tissue, esp…	FDA
-1.13535	0.703019	TCS HDAC6 20b	Selective HDAC6 inhibitor	Epigenetic
-1.13387	0.775332	ML396	Selective positive allosteric modulator of group III mGlu receptors	LOPAC
-1.13229	0.530797	AGI-6780	A potent, selective inhibitor of mutant IDH2	Epigenetic
-1.1312	0.804807	Granisetron hydrochloride	A 5-HT3 antagonist and anti-emetic	LOPAC
-1.13048	0.820424	(-)-Scopolamine,n-Butyl-, bromide	an anti-muscarinic and cholinolytic alkaloid that inhibits parasympathetic-cholinergic system. The central effects include hallucinations, disorientation, restlessness and euphoria.	LOPAC
-1.13	0.719461	Loxiglumide	CCK1 antagonist; active in vivo	LOPAC
-1.12006	0.468116	GSK126	Very high affinity and selective EZH2 inhibitor	Epigenetic
-1.11859	0.840014	Alfuzosin	Uroselective α1 antagonist	FDA
-1.11427	0.672402	Ginkgolide A	A terpenoid lactone with diverse biological activities	Natural
-1.11326	0.7535	13-cis-retinoic acid	anti-inflammatory and anti-tumor action. The action of RA is mediated through RAR-β and RAR-α receptors. RA attenuates iNOS expression and activity in cytokine-stimulated murine mesangial cells. It induces mitochondrial membrane permeability transition, observed as swelling and as a decrease in membrane potential, and stimulates the release of cytochrome c implicating mechanisms through the apopt…	LOPAC
-1.10993	0.744708	Geraldol	small molecule inducer of mitotic slippage	Natural
-1.10805	0.327847	Catalpol	An iridoid glycoside	Natural
-1.10396	0.789495	SC 19220	A selective EP1 receptor antagonist	LOPAC
-1.10387	0.80552	3-(1H-Imidazol-4-yl)propyl di(p-fluorophenyl)methyl ether HCl	H3 histamine receptor antagonist.	LOPAC
-1.09774	0.681595	S 24795	α7 nAChR partial agonist	LOPAC
-1.09384	0.825362	8-Methoxymethyl-3 isobutyl-1-methylxanthine	Selective inhibitor of Ca2+-calmodulin-dependent phosphodiesterase I (PDE1).	LOPAC
-1.09311	1.16451	Phaclofen	plays a vital role in identifying the physiological importance of central and peripheral bicuculline-insensitive receptors with which GABA and (−) baclofen interact. Phaclofen acts as a GABAB receptor antagonist. Phaclofen has an ability to reversibly block the late, bicuculline resistant, K+ dependent inhibitory postsynaptic potential (IPSP) logged in projection cells of the cat and rat dorsal l…	LOPAC
-1.09305	0.708934	Ganciclovir	a pro-drug nucleoside analog that is activated by phosphorylation. It is useful in the study of gene therapy in cancer research. Upon expression of a viral suicide gene encoding thymidine kinase, the non-toxic pro-drug is converted to a phosphorylated active analog and is incorporated into the DNA of replicating eukaryotic cells, causing death of the malignant dividing cell. The cell cycle is irr…	LOPAC
-1.09296	0.852328	(6R)-5,6,7,8-Tetrahydro-L-biopterin dihydrochloride	Lack of tetrahydrobiopterin may cause hyperphenylalaninemia. Diseases like, Parkinson′s, autism, depression and Alzheimer′s shows low concentration of tetrahydrobiopterin in the cerebrospinal fluid. This coenzyme participates in dopamine (DA) synthesis.	LOPAC
-1.09291	0.780495	RU-SKI 43 maleate	a potent and selective inhibitor of Hedgehog acyltransferase (Hhat) with an IC50 of 850 nM. RU-SKI 43 is the first small molecule found that inhibits the activity of Hedgehog acyltransferase (Hhat) and inhibits palmitoylation of Shh by endogenous Hhat in vitro and in cells. Most inhibitors of hedgehog signaling act downstream, inhibiting Smo or Gli components of the Shh pathway. The upstream acti…	LOPAC
-1.08663	0.450135	L-Mimosine	a plant amino acid and potential inhibitor of the cell cycle giving rise to growth arrest in G1-phase. It is an iron chelator that inhibits DNA replication in mammalian cells. L-Mimosine has been shown to promote apoptosis in xenotransplanted human pancreatic cancer. L-Mimosine stabilizes hypoxia inducible factor 1 (HIF-1) and stimulates the expression of B-cell translocation gene 2 (Btg2) and N-…	Natural
-1.08623	0.245606	LLY-507	Potent SMYD2 inhibitor	Epigenetic
-1.08586	0.723857	Triamcinolone	A synthetic glucocorticoid	LOPAC
-1.08431	0.249506	Desoxypeganine	an inhibitor of acetylcholinesterase	Natural
-1.08419	0.285056	Gramine	an analytical reference standard that is categorized as an alkaloid.1 It is used as an intermediate in the synthesis of tryptophans and tryptamines.	Natural
-1.08261	0.413223	Ropivacaine·HCl Monohydrate	Local anaesthetic with less cardiotoxicity than bupivacaine; causes reversible blockade of impulse propagation along nerve fibres by preventing the inward movement of sodium ions through the cell membrane of the nerve fibers.	FDA
-1.07763	0.772364	Domperidone	Peripheral dopamine receptor antagonist that does not cross the blood-brain barrier; anti-emetic.	LOPAC
-1.07258	0.758842	(±) trans-U-50488 methanesulfonate	Selective κ-opioid receptor agonist. (±)-trans-U-50488 methanesulfonate salt is known to induce diuresis. U-50488H is found to prevent morphine tolerance when administered along with it.	LOPAC
-1.07243	0.587319	EX-527	Selective SIRT1 inhibitor	Epigenetic
-1.07192	0.807359	Rilmenidine hemifumarate	Selective I1 imidazoline receptor agonist.	LOPAC
-1.06725	0.316656	Emodin	Inhibitor of NF-κB activation and adhesion molecule expression. Casein Kinase 2 (CK2) inhibitor.	Natural
-1.06447	0.795966	N-p-Tosyl-L-phenylalanine chloromethyl ketone	Blocks the LPS- or cytokine-induced activation of nuclear factor κB (NFκB), which, in turn, blocks the induction of iNOS and COX-2 transcription. Blocks activation of pp70s6k by all mitogens. Blocks apoptosis cell lines by inhibiting the processing of caspases in some cell lines and to some stimuli. Also blocks apoptosis initiated by Taxol (in MCF-7 human breast carcinoma cells). N-p-Tosyl-L-phen…	LOPAC
-1.06301	0.377222	Menadione	Menadione (Vitamin K3) is a synthetic analogue of of 1,4-naphthoquinone with a methyl group in the 2-position. Menadione is used as a phosphatase inhibitor and an inhibitor of mitochondrial DNA polymerase γ (pol γ). Menadione can be used as an oxidative injury (free radical generator) inducing agent. Menadione is an aromatic polycyclic ketone. It serves as a precursor for vitamin K synthesis. Men…	Natural
-1.05505	0.664053	Fenoterol hydrobromide	β2-adrenoceptor agonist; bronchodilator.	LOPAC
-1.05227	0.791546	SDZ-205,557 hydrochloride	Potent, selective 5-HT4 serotonin receptor antagonist.	LOPAC
-1.05073	0.281658	BYK 204165	Selective PARP-1 inhibitor	Epigenetic
-1.04871	0.868241	Phosphonoacetic acid	inhibits specifically human cytomegalovirus DNA synthesis in virus-infected human fibroblasts. It also inhibits the synthesis of herpes simplex virus DNA in infected cells and the activity of the virus-specific DNA polymerase in vitro.	LOPAC
-1.04837	0.770825	Nedocromil	a mast cell stabilizer and anti-inflammatory and anti-allergic drug. Nedocromil inhibits the degranulation of mast cells, and prevents the activation of and mediator release from a variety of inflammatory cell types. Nedocromil inhibits release of histamine, leukotriene C4, and prostaglandin D2, but has no antihistamine, bronchodilator, or corticosteroid activity itself.	LOPAC
-1.04636	0.764897	Loxapine Succinate	D2/D4 dopamine receptor antagonist; 5-HT2A/2B, 5-H7 serotonin receptor antagonist; dibenzoxazepine antipsychotic agent.	FDA
-1.04368	0.744854	Lubeluzole dihydrochloride	an NMDA antagonist. Lubeluzole blocks glutamate release, as well as sodium and calcium gated ion channels. Lubeluzole displays neuroprotective properties in ischemia models.	LOPAC
-1.04031	0.711347	Flupirtine maleate	useful in treating muscular spasm, muscle tension and muscle stiffness. It is known to be effective in relieving back pain. Along with cytoprotection, flupirtine also offers protection against neurodegenerative disorders such as multiple sclerosis, amyotrophic lateral sclerosis, Alzheimer′s disease, Parkinson′s disease, Huntington′s chorea and AID (acquired immunodeficiency) associated encephalop…	LOPAC
-1.03965	0.787711	Lubiprostone	a bicyclic fatty acid that activates ClC-2 and CFTR chloride channels. Some reports suggest that lubiprostone opens CFTR or both CFTR and ClC-2 through interactions with the prostaglandin receptor EP4. Lubiprostone is used clinically to treat idiopathic chronic constipation and irritible bowel syndrome.	LOPAC
-1.03863	0.743101	Ruthenium red	A blocker of transmembrane Ca2+ fluxes (IC50 = 7 µM) that attenuates capsaicin-induced cation channel opening. Inhibits Ca2+-induced Ca2+ release from ryanodine-sensitive intracellular Ca2+ stores. Inhibits K+-stimulated catecholamine secretion (IC50 = 6 µM).	LOPAC
-1.03859	0.248913	Garcinol	HAT inhibitor	Epigenetic
-1.03705	0.481238	Melatonin	An indoleamine neurohormone that entrains circadian rhythms	Natural
-1.03617	0.868571	Neostigmine bromide	Reversible inhibitor of acetylcholinesterase that is similar to eserine, but does not cross the blood-brain barrier.	LOPAC
-1.03505	0.636373	Formononetin	Isoflavone found in red clover. Effective against Giardia lamblia infection, at least partially by inducing detachment of trophozoites from intestinal mucosa.	Natural
-1.03425	0.336187	6-Thioguanine	Ribosylated and phosphorylated by the same pathway as natural purine bases; as the nucleotide, inhibits a variety of cellular processes involved in nucleic acid synthesis. Has a long history as an effective treatment of leukemia. Antimetabolite used in the treatment of leukemias. Competes with hypoxanthine and guanine for the enzyme hypoxanthine-guanine phosphoribosyltransferase, which catalzyes …	Epigenetic
-1.03154	0.560267	Harringtonine	An inhibitor of translation	Natural
-1.03076	0.718247	Letrozole	An aromatase inhibitor	LOPAC
-1.02991	0.783096	Steviol	An OAT inhibitor	LOPAC
-1.02838	0.365229	Jervine	An inhibitor of the hedgehog signaling pathway	Natural
-1.0274	0.262731	Disulfiram	An irreversible inhibitor of aldehyde dehydrogenase	Epigenetic
-1.0262	0.681178	Olprinone hydrochloride	An inhibitor of PDE3	LOPAC
-1.02462	0.43595	Rizatriptan Benzoate	A 5-HT1B and 5-HT1D receptor agonist	FDA
-1.02433	0.854532	Procainamide hydrochloride	a sodium channel blocker and Class IA anti-arrhythmic. It has also been shown to Inhibit DNA methyltransferase and modulate epigenetic regulation of gene expression.	LOPAC
-1.02319	0.798412	Darunavir	the first treatment of drug-resistant human immunodeficiency virus (HIV). A second-generation antiviral HIV protease inhibitor with broad spectrum activity.	LOPAC
-1.02024	0.213159	C 646	Selective p300/CBP inhibitor	Epigenetic
-1.00982	0.747367	SKF 83959 hydrobromide	D1-like partial agonist	LOPAC
-1.00708	0.760432	(+-)-Synephrine	α-adrenoceptor agonist, vasoconstrictor.	LOPAC
-1.00672	0.752141	Lomeguatrib	a highly potent inactivator of O(6)-methylguanine-DNA methyltransferase (MGMT), a DNA repair protein which can confer resistance to some cancer chemotherapeutics, in particular the DNA alkylating agents such as Temozolomide, DTIC, Carmustine, etc. Lomeguatrib is a highly potent inactivator of MGMT and can be used to further investigate mechanisms of resistance. It is a potent irreversible inactiv…	Epigenetic
-1.00616	0.429022	PJ 34	Potent PARP inhibitor	Epigenetic
-1	0.585389	Nitidine chloride	active against the F32 chloroquine-sensitive and FcB1 and FcM2 chloroquine-resistant strains of P. falciparum (IC50s = 0.52, 0.8, and 0.49 µM, respectively) and reduces parasitemia in a mouse model of P. vinckei infection with an ED50 value of 18.9 mg/kg per day. It decreases LPS-induced increases in TNF-α, IL-1β, and IL-6 levels and p65 nuclear translocation in RAW 264.7 cells when used at a con…	LOPAC
-0.999382	0.829671	Memantine·HCl	A very potent, voltage-dependent, rapidly unbinding antagonist (calcium channel blocker) of NMDA receptors (IC50 = 0.8, 0.57, 0.52, and 0.54 µM for GluN2A, B, C, and D, respectively). A popular medicine for treating moderate-to-severe Alzheimer′s disease. Frequently used in studying brain functions and disorders involving neurotransmission mediated by NMDA receptors (i.e. learning and memory, cog…	FDA
-0.99463	0.737118	Trazodone hydrochloride	Antidepressant that potentiates the activity of serotonin uptake blockers and has full 5-HT2C serotonin receptor agonist activity. It is metabolized to the 5-HT1 serotonin receptor agonist 1-(3-Chlorophenyl)piperazine.	LOPAC
-0.994346	0.49544	6,7-Dihydroxyflavone	a potent and selective small-molecule agonist of the tropomyosin receptor kinase B (TrkB) (Kd ≈ 320 nM), the main signaling receptor of the neurotrophin brain-derived neurotrophic factor (BDNF). 7,8-DHF is both orally bioavailable and able to penetrate the blood–brain barrier.	Natural
-0.994346	0.637293	Vanillylacetone	one of the key aroma constituents of ginger. It is a pharmacologically active compound that may contribute to the anti-inflammatory, anti-oxidant, anti-cancerous, radioprotective and anti-microbial properties of ginger.	Natural
-0.994336	0.795894	Ro 25-6981 hydrochloride	Potent and selective antagonist of NMDA glutamate receptors containing the NR2B subunit.	LOPAC
-0.992661	0.814477	SB 206553 hydrochloride	Potent and selective 5-HT2B and 5-HT2C antagonist; orally active	LOPAC
-0.990078	0.770055	R(-)-Apocodeine hydrochloride	Dopamine receptor agonist; apomorphine metabolite.	LOPAC
-0.988674	0.8136	Dihydro ergotamine methanesulfonate	an ergot alkaloid used to treat migraines; an agonist to the serotonin receptors and causing vasoconstriction of the intracranial blood vessels, but also interacts centrally with dopamine and adrenergic receptors.	LOPAC
-0.986913	0.778563	Ribavirin	A non-interferon-inducing, broad spectrum antiviral nucleoside. Reported to be active against RSV, HIV, HCV, and other infectious agents. Its metabolite, ribavirin-5′-phosphate, inhibits inosine monophosphate (IMP) dehydrogenase.	LOPAC
-0.986308	0.867631	Milrinone	A cell-permeable, selective inhibitor of cGMP-inhibited phosphodiesterase (PDE III; IC50 = 300 nM). Has positive chronotropic, inotropic, and vasodilatory effects on the heart.	LOPAC
-0.982947	0.603596	Halcinonide	A synthetic glucocorticoid	FDA
-0.982006	0.80096	Phosphoramidon disodium	Inhibits some metalloendopeptidases. Highly specific inhibitor of thermolysin. Inhibits the conversion of big endothelin-1 to endothelin (IC50 = 4.6 µM).	LOPAC
-0.981075	0.839822	(S)-MAP4 HCl	a selective group III mGluR (metabotropic glutamate receptor) agonist.	LOPAC
-0.977661	0.803232	SKF-525A hydrochloride	Cell permeable. Blocks glibenclamide-sensitive K+ channels. Inhibits neuronal nitric oxide synthase (IC50 = 90 µM). Also inhibits hepatic drug metabolism by inhibiting the cytochrome P450 system. Stimulates endothelial cell prostacyclin production while inhibiting platelet thromboxane synthesis. Potentiates the action of many drugs in vivo.	LOPAC
-0.976706	0.680093	Asiatic acid	commonly used in wound healing. Asiatic acid has antioxidant, anti-inflammatory and neuroprotective properties.	Natural
-0.974789	0.771969	Clorgyline hydrochloride	MAO-A inhibitor	LOPAC
-0.973496	0.357143	Prostaglandin B1	non-enzymatic dehydration product of PGE1 resulting from treatment with strong base. Oligomers of PGB1 are known to exhibit antioxidant and ionophoric activity.	Natural
-0.973073	0.79366	Cysteamine hydrochloride	Cysteamine is used in the biosynthesis of coenzyme A (CoA). Cysteamine may be useful in studies on oxidative stress and glycation (transglycating agent). Cysteamine is a substrate useful to study the specificity and kinetics of cysteamine (2-aminoethanethiol) dioxygenase(s) (ADO).	LOPAC
-0.971208	0.642637	Leucovorin Calcium Pentahydrate	thymidylate synthase	FDA
-0.966411	0.792375	TCPOBOP	Constitutive androstane receptor agonist	LOPAC
-0.964646	0.414962	Vigabatrin	GABA-T inhibitor	FDA
-0.961225	0.767098	SB 205384	GABAA modulator; slows current decay	LOPAC
-0.961214	0.742368	L-beta-threo-benzyl-aspartate	a preferential EAAT3 excitatory amino acid transporter antagonist	LOPAC
-0.960004	0.776696	D-Serine	essential for the normal development of dendrites, neuroblast migration and may have therapeutic potential for treating schizophrenia and depression states. The levels of D-serine is elevated in traumatic brain injury (TBI).	LOPAC
-0.958812	0.857577	Abiraterone acetate	a prodrug of abiraterone, which is a potent, selective, and orally bioavailable inhibitor of CYP17A1 (CYP450c17), an enzyme that catalyzes two key serial reactions (17α hydroxylase and 17,20 lyase) in androgen and estrogen biosynthesis resulting in the formation of DHEA and androstenedione, which may ultimately be metabolized into testosterone. CYP17 is the key enzyme for androgen biosynthesis in…	LOPAC
-0.95762	0.69518	p-Fluoro-L- phenylalanine	a toxic antimetabolite, is a racemic mixture of a substituted (halogenated) benzoyl D and L phenylalanine useful as a selection marker for wine yeast transformation and with potential use in endomorphin, antiviral, and antimicrobial drug development. Phenylalanine analogue, rho-fluorophenylalanine (pFPhe) is also used to induce apoptosis.	LOPAC
-0.954538	0.391873	Teniposide	a Topoisomerase II inhibitor with antitumor activity. Teniposide inhibits DNA synthesis by forming a complex with topoisomerase II and DNA, inducing breaks in double stranded DNA and preventing repair.	FDA
-0.953954	0.783362	Rolipram	A cell-permeable, selective inhibitor of cAMP-specific phosphodiesterase (PDE IV; IC50 = 800 nM). A rolipram-insensitive PDE IV subtype is also known to exist. Also inhibits NF-κB and NFAT activation in Jurkat and primary T cells. Cell permeable, selective competitive inhibitor of cAMP-specific phosphodiesterase IV (IC50 = 800 nM). Rolipram does not inhibit PDE I or PDE II, even at concentrations…	LOPAC
-0.9503	0.813925	Pseudocantharidin C	stimulates PP2A activity up to two-fold without influencing PP1. PP2A activation by pseudocantharidin C changes phosphorylation of tra2-beta1 at position T33 and promotes the SMN2 pre-mRNA exon 7 inclusion.	LOPAC
-0.947481	0.761155	Apratastat	an orally active, potent and selective dual inhibitor of disintegrin metalloenzyme 17 (ADAM17/ TACE) and matrix metalloprotease (MMP).	LOPAC
-0.94672	0.85317	(+/-)-3-(3,4- dihydroxyphenyl)-2- methyl-DL-alanine	Inhibitor of L-aromatic amino acid decarboxylase. Developed as an antihypertensive with a predominantly CNS site of action. It acts via its metabolite α-methylnoradrenaline and the stimulation of central α2-adrenoceptors in the brain stem, leading to peripheral sympathoinhibition and a reduction of elevated blood pressure, heart rate, and plasma catecholamines.	LOPAC
-0.940976	0.828795	Gabapentin	an anticonvulsant drug used primarily for treatment of seizures, fibromyalgia, and chronic neuropathic pain. This certified Snap-N-Spike® Reference Solution is suitable for use in GC/MS or LC/MS applications from forensic analysis, clinical toxicology and pain prescription monitoring to urine drug testing.	FDA
-0.935384	0.672806	Vulpinic acid	a lichen metabolite that has been found in L. vulpina and has diverse biological activities. It is active against C. perfringens, B. vulgatus, B. fragilis, B. loescheii, P. acnes, E. faecium, and methicillin-susceptible and -resistant S. aureus (MICs = 4-16 μg/ml).1 Vulpinic acid (25-800 μM) prevents UVB-induced apoptosis, cytotoxicity, and cytoskeletal modifications in HaCaT human keratinocytes.…	Natural
-0.933903	0.228623	TG101348 (SAR302503)	A JAK2 inhibitor	Epigenetic
-0.933133	0.778561	Tolbutamide	Anti-diabetic agent. Metabolized by CYP2C9 (tolbutamide hydroxylase).	LOPAC
-0.927771	0.606678	Mepenzolate Bromide	A muscarinic M2 and M3 receptor antagonist	FDA
-0.92656	0.735737	Olanzapine	An atypical antipsychotic	LOPAC
-0.922751	0.407246	Suramin·6Na	a polysulfonated naphthylurea that inhibits the binding of calmodulin to recognition sites on the ryanodine receptor-1 (IC50 = 4.9 μM), blocks G protein coupling to GPCRs, and non-selectively antagonizes P2 purinergic receptors (10-100 μM). Suramin also acts as a non-specific competitor of glycosaminoglycan binding to a variety of targets including TGFβ, PDGF, and FGF and additionally inhibits in…	Epigenetic
-0.922098	0.348465	Chelerythrine	Naturally occurring alkaloid. Cell-permeable, selective inhibitor of protein kinase C (IC50 = 660 nM). Acts on the catalytic domain irrespective of the attachment of the regulatory domain. Material is a competitive inhibitor with respect to the phosphate acceptor and a non-competitive inhibitor with respect to ATP. Over ten-fold more potent than H-7, HCl (Cat. No. 371955). Inhibits thromboxane fo…	Natural
-0.918937	0.655034	IPA-3	an allosteric inhibitor of Pak1. It binds to autoinhibitory domain of Pak1 (p21 activated kinase), highly selective amongst kinases. Pak1 is implicated in tumorigenesis and metastasis.	LOPAC
-0.917959	0.674313	1,3,5-tris(4- hydroxyphenyl)-4- propyl-1H- pyrazole	Estrogen receptor α (ERα) is involved in immune and inflammatory responses. Aberrations in ESR1 results in Mayer-Rokitansky-Kuster-Hauser syndrome that is associated with the congenital absence of the uterus and the upper two-thirds of the vagina. PPT is a specific estrogen receptor α (ERα) agonist.	LOPAC
-0.91698	0.853821	Icilin	a potent agonist at the CMR1 cold- and menthol-sensitive receptor.	LOPAC
-0.916906	0.75865	Coumestrol	Coumestrol has anti-estrogenic actions in the brain and pituitary, mediated through estrogen receptor-α.	Natural
-0.915713	0.738302	SCH-202676 hydrobromide	inhibits the binding of both agonists and antagonists to G protein-coupled receptors. It also inhibits human μ-, δ-, and κ-opioid, α- and β-adrenergic, muscarinic M1 and M2, and dopaminergic D1 and D2 receptors. Some reports indicates thiol modification as the mechanism of inhibition rather than allosteric modulation. Allosteric agonist and antagonist of G-protein coupled receptors (GPCRs).	LOPAC
-0.912989	0.785762	(-)-Scopolamine methyl nitrate	an anti-muscarinic and cholinolytic alkaloid that inhibits parasympathetic-cholinergic system. The central effects include hallucinations, disorientation, restlessness and euphoria. Scopolamine disturb the stimulus detection performance in rats by interfering with the reticular cholinergic pathways.	LOPAC
-0.911937	0.7519	(+-)-Sotalol hydrochloride	A relatively potent pure β adrenergic antagonist, unique in possessing additional class III antiarrhythmic activity.	LOPAC
-0.910905	1.06093	Putrescine dihydrochloride	Binds to the polyamine modulatory site of the NMDA receptor and potentiates NMDA-induced currents; precursor of spermidine.	LOPAC
-0.905682	0.882051	Noscapine hydrochloride	orally bioavailable hydrochloride salt of the opioid agonist noscapine, a phthalideisoquinoline alkaloid derived from the opium poppy Papaver somniferum, with mild analgesic, antitussive, and potential antineoplastic activities. Noscapine binds to tubulin and alters its conformation, resulting in a disruption of the dynamics of microtubule assembly (by increasing the time that microtubules spend …	LOPAC
-0.903667	0.345622	Fillalbin	a tropane alkaloid, from plants of the Convolvulus genus, Convolvulaceae. It causes cramps, increases arterial blood pressure and breathing frequency. Fillalbin induces clonico-tonic cramps in vivo. The death of mice occurs after 2 or 3 brief cramps.	Natural
-0.901932	0.335678	Dihydroergocristine mesylate	5-HT receptor antagonist; partial agonist at adrenergic and dopaminergic receptors.	Natural
-0.899592	0.937548	Phenylbutazone	Non-steroidal anti-inflammatory compound; inhibitor of cyclooxygenase that is also a substrate for peroxidation by cyclooxygenase	LOPAC
-0.899389	0.324275	Zebularine	A cell-permeable chemically stable cytidine analog that displays antitumor properties. Acts as transition state analog inhibitor of cytidine deaminase by binding at the active site as covalent hydrates. Also shown to inhibit DNA methylation and tumor growth both in vitro and in vivo. A chemically stable, cytidine analog that displays anti-tumor properties. Acts as a transition state analog inhibi…	Epigenetic
-0.89367	0.390665	Daidzein	protects against oxidative damage in liver cells induced by 7,12-dimethylbenz[a]anthracene (DMBA). Catalase and superoxide dismutase activity, down-regulated by DMBA, was restored by daidzein. Daidzein is a phytoestrogen that is suggested to play a role in preventing hormone-induced cancers. Arrests cell cycle at G1 in Swiss 3T3 cells.	Natural
-0.892391	0.757839	TTNPB	A synthetic stilbene analog of retinoic acid that acts as a potent retinoic acid receptor (RAR) agonist (EC50 = 21 nM, 4.0 nM, and 2.4 nM for RARα, RARβ, and RARγ, respectively).	LOPAC
-0.89202	0.801227	(-)-Scopolamine methyl bromide	an anti-muscarinic and cholinolytic alkaloid that inhibits parasympathetic-cholinergic system. The central effects include hallucinations, disorientation, restlessness and euphoria. Scopolamine disturb the stimulus detection performance in rats by interfering with the reticular cholinergic pathways.	LOPAC
-0.890548	0.841026	Perifosine	a selective bioavailable alkylphospholipid inhibitor of protein kinase B/Akt (PKB/Akt) with anti-proliferative activity. Perifosine acts on cell membranes, selectively targeting proliferating cells, inducing growth arrest and apoptosis.	LOPAC
-0.890185	0.760165	Suprofen	a nonsteroidal anti-inflammatory drug that inhibits COX-1/2. Suprofen exhibits a potent anti-inflammatory, analgesic and antipyretic activities.	LOPAC
-0.887027	0.671187	Lappaconitine	Selective blocker of the TTX-sensitive Na+ channels, without influence on the activation threshold of Na+ channels.	Natural
-0.885081	0.806935	Oxotremorine sesquifumarate salt	a muscarinic acetylcholine receptor agonist with preference for the M2 receptor.	LOPAC
-0.884513	0.831062	BRD3308	a highly selective inhibitor of histone deacetylase 3 (HDAC3) with an IC50 value of 65 nM for HDAC3 vs. IC50 values of 1.08 μM and 1.15 μM for HDAC1 and HDAC2, respectively. BRD3308 protected pancreatic β cells, suppressing inflammatory cytokine-induced apoptosis and increasing insulin release without the toxicity associated with HDAC1 and HDAC2 inhibitors. In a rat model of type 2 diabetes, BRD3…	LOPAC
-0.87762	0.777179	(E)-4-amino-2-butenoic acid	GABAA agonist; also GABA-T substrate and GABA uptake inhibitor	LOPAC
-0.877232	0.447439	(±)-Kavain	a positive allosteric modulator of α4β2δ subunit-containing GABAA receptors	Natural
-0.875676	0.54205	Dicoumarol	A competitive NQO1 inhibitor	Natural
-0.875005	0.470704	Picrotoxinin	A natural antagonist of GlyRs; Picrotin is inactive in inhibiting γ-aminobutyric acid (GABA) type A and type C receptors.	Natural
-0.869265	0.922692	Metaproterenol hemisulfate	A long-acting β2-adrenergic receptor agonist	LOPAC
-0.868246	0.413043	Cyclopiazonic acid	A mycotoxin and specific inhibitor of SERCA	Natural
-0.868127	0.700126	XCT790	Selective ERRα inverse agonist	LOPAC
-0.86498	0.824104	Pentoxifylline	PDE inhibitor	LOPAC
-0.863528	0.414962	Voriconazole	Triazole antifungal agent	FDA
-0.862874	0.36548	KD 5170	An inhibitor of class I and II HDACs	Epigenetic
-0.858835	0.836337	3-Nitropropionic acid	An inhibitor of complex II	LOPAC
-0.856492	0.832067	Carvedilol	an irreversible inhibitor of mitochondrial respiratory Complex II succinate dehydrogenase, resulting in energy depletion through disruption of the electron transport chain	FDA
-0.854173	0.624228	Rutaecarpine	inhibits COX-1 and COX-2 in BMMC cells and is selective for COX-2 in HEK293 cells. It slows the growth of cancer cells. It also has cardiovascular properties, inducing dose-dependent vasodilation (0.1-10 µM) of precontracted isolated rat aorta and inhibiting platelet aggregation. In addition, rutaecarpine (80 mg/kg) decreases plasma levels of caffeine in rat by inducing its metabolism through the…	Natural
-0.851741	0.747959	SRPIN340	A selective inhibitor of SRPK1	LOPAC
-0.851598	0.793553	3-Morpholinosydnonimine hydrochloride	Liberates nitric oxide (NO) spontaneously when in solution, activating guanylyl cyclase and causing an increase in cyclic-GMP. This product is a vasodilator and inhibits platelet aggregation. Using molecular oxygen, it generates both superoxide anion and nitric oxide that spontaneously form peroxynitrite.	LOPAC
-0.849749	0.796427	MK 0677	High affinity ghrelin receptor agonist	LOPAC
-0.848882	0.646088	Hypocrellin B	a sonosensitizer, decreasing the viability of MDA-MB-231 breast cancer cells and inducing apoptosis in the presence of ultrasound exposure, effects that can be inhibited by the caspase inhibitor z-VAD-FMK. It also increases the production of reactive oxygen species (ROS) in MDA-MB-231 cells when used at a concentration of 2.5 µM with concomitant ultrasound exposure. Hypocrellin B (20 µM), in comb…	Natural
-0.848265	0.48248	Rosmarinic acid	A phenolic compound with antioxidant and anti-inflammatory properties	Natural
-0.845922	0.776974	L-DOPS	a synthetic precursor and prodrug of the neurotransmitter norepinephrine. It is transformed into norepinephrine through the action of DOPA decarboxylase. L-DOPS increases norepinephrine levels in the rat heart following intraperitoneal administration and in the brain following intracerebroventricular administration at doses of 125 and 100 µg/animal, respectively. It increases arterial pressure an…	LOPAC
-0.845277	0.768815	UPF 1069	A selective PARP2 inhibitors	Epigenetic
-0.842662	0.376685	13-cis-Retinoic acid	anti-inflammatory and anti-tumor action. The action of RA is mediated through RAR-β and RAR-α receptors. RA attenuates iNOS expression and activity in cytokine-stimulated murine mesangial cells. It induces mitochondrial membrane permeability transition, observed as swelling and as a decrease in membrane potential, and stimulates the release of cytochrome c implicating mechanisms through the apopt…	Natural
-0.842421	0.497038	Monocrotaline	An alkaloid that induces pulmonary hypertension in rats	Natural
-0.841978	0.729383	L-Tryptophan	a substrate for tryptophan hydroxylase (TPH), indoleamine-2,3-dioxygenase (IDO), and tryptophan-2,3-dioxygenase (TDO) for the biosynthesis of serotonin and kynurenine. L-Tryptophan is also metabolized by enteric bacteria expressing tryptophanase into indole, pyruvate, and ammonia. It increases 5-HT, 5-hydroxy-L-tryptophan, and 5-hydroxyindolacetic acid levels in the diencephalon of rats when admi…	LOPAC
-0.84081	0.584075	Isradipine	An L-type calcium channel blocker	FDA
-0.839757	1.06245	1- Methylnicotinamide chloride	a primary metabolite of nicotinamide produced by the action of nicotinamide N-methyltransferase. It demonstrates antithrombotic and anti-inflammatory properties through direct action on the endothelium by a mechanism involving the prostacyclin pathway and by improving nitric oxide bioavailability. Aggressive cancer cell lines are reported to have higher levels of MNA due to increased NNMT-directe…	LOPAC
-0.839564	0.857578	Phenamil methanesulfonate	A TRPP3 inhibitor	LOPAC
-0.839161	0.727725	KB-R7493	inhibits the reversed Na(+)/Ca(2+) exchanger, NCX. In cardiomyocytes, Ca2+ is released from intracellular stores during contraction, and sequestered again during relaxation. NCX is the primary mechanism that prevents Ca2+ overload due to influx of calcium across the plasma membrane.	LOPAC
-0.837645	0.702307	CYM-5520	Selective S1P2 allosteric agonist	LOPAC
-0.83694	0.709899	DPO-1	Blocker of KV1.5 channel and IKur current	LOPAC
-0.83556	0.834816	4-Methylpyrazole hydrochloride	Alcohol dehydrogenase inhibitor	LOPAC
-0.834315	0.969535	Phentolamine mesylate	A reversible α-adrenergic receptor antagonist	LOPAC
-0.830594	0.686011	Furegrelate sodium salt	Thromboxane synthetase inhibitor	LOPAC
-0.829685	0.749827	Dolasetron mesylate hydrate	a highly specific and selective serotonin 5-HT3 receptor antagonist, not shown to have activity at other known serotonin receptors and with low affinity for dopamine receptors.	LOPAC
-0.829079	0.205882	Bilobalide	shown to protect against cerebral edema, decrease cortical infarct volume, and reduce cerebral ischemic damage. Bilobalide, at 10 μM, reduces the release of glycine and glutamate from hippocampal slices under ischemic conditions. It also activates the rat constitutive androstane receptor at 100 μM and increases the levels and activities of several cytochrome P450 isoforms in rat liver microsomes.	Natural
-0.827982	1.0457	Promazine hydrochloride	D2 dopamine receptor antagonist; phenothiazine antipsychotic.	LOPAC
-0.827695	0.699167	(-)-trans-(1S,2S)-U-50488 HCl	Potent κ opioid receptor agonist; more potent enantiomer of (±)-trans-U-50488.	LOPAC
-0.824087	0.335678	Domoic acid	a potent agonist at receptors for excitatory amino acids glutamate and kainate. It has highest affinity for AMPA/kainate receptor of any kainate agonist. It can causes excessive excitation of neurons leading to depletion of energy stores.	Natural
-0.822769	0.791209	LE 300	Potent and selective D1 antagonist	LOPAC
-0.822634	0.615724	Moexipril·HCl	an ACE-Inhibitor; Antihypertensive; Unlike other ACE inhibitors, prolongs QT interval leading to torsades de pointes and cardiad arrhythmia;	FDA
-0.818824	0.866227	Sivelestat sodium salt hydrate	a competitive human neutrophil elastase (HNE) inhibitor (IC50 = 44 nM, Ki = 0.2 μM). It also inhibits leukocyte elastase obtained from rabbit, rat, hamster and mouse (IC50 = 19 to 49 nM). However, it does not inhibit trypsin, thrombin, plasmin, plasma kallikrein, pancreas kallikrein, chymotrypsin and cathepsin G even at 100 μM. In in-vivo studies, it suppressed lung hemorrhage in hamster (ID50 = …	LOPAC
-0.817671	0.383609	Tiopronin	reduces free radical production by murine macrophages and granulocytes in vitro in a dose-dependent manner. Tiopronin induces expression of hypoxia-inducible factor 1α (HIF-1α) and increases VEGF secretion in human colon carcinoma cells. Rectal administration (500 μL of a 10 mM solution) reduces myeloperoxidase activity and reduces pro-inflammatory cytokine production in the colon in a rat model …	FDA
-0.817204	0.847677	Quercetin dihydrate	Non-selective PI 3-kinase inhibitor	LOPAC
-0.815042	0.710338	Chloroquine diphosphate	Antimalarial; inhibits apoptosis and autophagy	LOPAC
-0.809133	0.367647	Curcumin	Antitumor, anti-inflammatory and antioxidant	Natural
-0.807574	0.382231	Terconazole	an orally bioavailable broad-spectrum triazole antifungal agent that completely inhibits growth of T. rubrum, M. audouini, M. canis, and T. verrucosum, as well as some C. albicans and A. fumigatus strains and other fungi when used at a concentration of 100 μg/ml. It also has bacteriostatic activity against E. coli, P. aeruginosa, S. aureus, and S. pyogenes when used at a concentration of 100 μg/m…	FDA
-0.807426	0.848645	ZM 39923 hydrochloride	A potent inhibitor of JAK3	LOPAC
-0.805728	0.705383	Hemicholinium-3	Potent and selective choline uptake blocker.	LOPAC
-0.804876	0.846558	Verapamil·HCl	A derivative of papaverine that blocks Ca2+ channels (principally the L-type) in smooth and cardiac muscle cells. Vasodilator and antiarrhythmic agent. Inhibits the entry of Ca2+ through voltage-dependent Ca2+ channels in cell membranes. Blocks both activated and inactivated Ca2+ channels. An adrenergic antagonist. Induces apoptosis of human primary and metastatic colon adenocarcinoma cell lines …	FDA
-0.804512	0.704173	Raloxifene hydrochloride	Raloxifene is benzothiophene compound and is used in treating postmenopausal osteoporosis. It comparatively induces lesser risk in developing thromboembolic events and cataracts compared to tamoxifen. Raloxifene also interacts with estrogen receptors and plasma proteins.	LOPAC
-0.801778	0.793925	P1,P4-Di(adenosine- 5')tetraphosphate ammonium	Diadenosine polyphosphate (Ap4A) functions as a second messenger in pancreatic cells. Diadenosine polyphosphate is majorly stored in neuronal cells, thrombocytes and chromaffin. It stimulates phospholipase D, fluctuates intracellular calcium levels, induces nitric oxide release, activates 5′-nucleotidase, and inhibits adenosine kinase activity in vitro. The membrane-bound ectoenzymes in endotheli…	LOPAC
-0.800692	0.794479	Progesterone	the biosynthetic precursor of all other steroid hormones. Progesterone is synthesized from cholesterol by the sequential action of desmolase in the mitochondria, which produces pregnenolone, followed by Δ4,5-isomerase in the outer mitochondrial membrane and smooth endoplasmic reticulum of steroid-secreting cells. Progesterone activates the human progesterone receptor with an EC50 value of 0.5 nM.	LOPAC
-0.800405	0.552995	4,5',8-Trimethylpsoralen	A UV-activated DNA crosslinking probe	Natural
-0.800322	0.806351	Dobutamine hydrochloride	A β-adrenergic receptor agonist	LOPAC
-0.800107	0.803232	Praziquantel	an anthelmintic agent	LOPAC
-0.799895	0.649038	RN-9893	A TRPV4 antagonist	LOPAC
-0.798348	0.462121	Telbivudine	An antiviral nucleoside analog	FDA
-0.79823	0.635158	Cepharanthine	exhibits antiparasitic, antimalarial, antiviral, anti-inflammatory, antimetastatic, and anticancer activities in various cell and animal models. Cepharanthine can decrease LPS-stimulated expression of TNF-α, IL-6, and IL-1β in macrophages and prevent the activation of NF-κB, ERK, JNK, and p38 MAPK. It has also been shown to inhibit cell and tumor growth, inducing G1 phase cell cycle arrest and ap…	Natural
-0.796293	0.742091	FAUC 213	Highly selective D4 dopamine receptor full antagonist	LOPAC
-0.795507	0.748446	Tetraisopropyl pyrophosphoramide	an inhibitor of BChE (butyrylcholinesterase)	LOPAC
-0.794821	0.336088	Sorafenib Tosylate	An inhibitor of Raf-1, B-RAF, and RTKs and an inducer of ferroptosis	FDA
-0.793977	0.774693	Triflupromazine hydrochloride	binds to muscarinic receptors in isolated rat corpus striatum (IC50 = 100 μM in a radioligand binding assay). Triflupromazine inhibits serotonin (5-HT) uptake by isolated rat brainstem synaptosomes (IC50 = 0.8 μM). It inhibits T. cruzi infection in mouse peritoneal macrophages when used at a concentration of 12.5 μM. Triflupromazine is active against S. aureus, shigellae, and vibrios (MICs = 2-10…	LOPAC
-0.790489	0.74817	cDPCP	a tumor cell permeable, potent platinum-based antineoplastic agent. It is a cationic monofunctional platinum(II) complex with unique chemical and biological properties. cDPCP binds covalently only to a single DNA base (the N7 atom of a single guanosine residue), and thus forms monofunctional rather than bifunctional lesions with DNA. cDPCP effectively blocks transcription from DNA templates carry…	LOPAC
-0.789752	0.827586	Methoxamine hydrochloride	α1-adrenoceptor agonist.	LOPAC
-0.789391	0.655399	Ecdysone	A prohormone of 20-hydroxy ecdysone	Natural
-0.789245	0.46159	β-Lapachone	An anti-cancer quinone	Natural
-0.788173	0.643202	Pemirolast Potassium	A histamine H1 receptor antagonist and mast cell stabilizer	FDA
-0.787331	0.304987	Capsaicin	the primary active component of the heat and pain-eliciting lipid-soluble fraction of the Capsicum pepper. Capsaicin is present in natural hot pepper extracts along with a number of impurities, including dihydrocapsaicin and several lesser impurities. Separation by HPLC is required in order to obtain capsaicin of consistently high purity and reproducible quality. VR1 is a heat-activated calcium i…	Natural
-0.783111	0.823767	Pentamidine isethionate	NMDA antagonist: antimicrobial	LOPAC
-0.782879	0.59751	Hesperidine	increase the cytotoxicity of doxorubicin on MCF-7 and HeLa cancer cells in vitro by inhibiting cell cycle progression and upregulating apoptosis. It also is reported to produce estrogenic effects, decreasing serum and hepatic lipid concentrations and reducing osteoporosis in ovariectomized rats. Hesperidin produces free radical scavenging activity in various in vitro antioxidant assays.	Natural
-0.781812	0.645279	Panaxatriol	a sapogenin that has been found in P. ginseng and has diverse biological activities, including antiproliferative, cardioprotective, and antidiabetic properties.	Natural
-0.781809	0.696401	Ciproxifan hydrochloride	a novel chemical series of histamine H3-receptor antagonists	LOPAC
-0.781212	0.796649	Lasofoxifene tartrate	a third-generation selective estrogen receptor modulator (SERM). Lasofoxifene possesses strong resistance to intestinal wall glucuronidation and thus promotes oral bioavailability. In postmenopausal women, it reduces bone resorption, bone loss and low density lipoprotein (LDL) cholesterol. Selective and regular dose of Lasofoxifene is known to reduce the risk of fractures, breast cancer, major co…	LOPAC
-0.779107	0.673276	UNC 926	L3MBTL1 domain inhibitor	Epigenetic
-0.777077	0.502304	Yohimbine·HCl	An α2-adrenoceptor antagonist	Natural
-0.776805	0.77243	Ropinirole hydrochloride	A dopamine D2 receptor agonist	LOPAC
-0.776074	0.669084	Chelidamic Acid	Among the most potent of the tested "conformationally restricted glutamate analogs" as an inhibitor of glutamate decarboxylase.	LOPAC
-0.775179	0.822271	Levetiracetam	a pyrrolidine with antiepileptic activity. Stereoselective binding of levetiracetam was confined to synaptic plasma membranes in the central nervous system with no binding occurring in peripheral tissue. Levetiracetam inhibits burst firing without affecting normal neuronal excitability, which suggests that it may selectively prevent hyper-synchronization of epileptiform burst firing and propagati…	LOPAC
-0.7751	0.72577	Reactive Blue 2	P2Y purinoceptor antagonist; most potent antagonist for ATP-activated channels.	LOPAC
-0.773491	0.720265	Na-p-Tosyl-L-lysine chloromethyl ketone HCl	blocks the lipopolysaccharide (LPS)- or cytokine-induced activation of nuclear factor κB (NF-κB), which, in turn, blocks the induction of inducible nitric oxide synthase (iNOS) and cyclooxygenase-2 (COX-2) transcription. Blocks activation of pp70s6k by all mitogens. Blocks apoptosis in cell lines by inhibiting the processing of caspases in some cell lines and to some stimuli.	LOPAC
-0.773077	0.717771	Resveratrol	a potent phenolic antioxidant found in grapes, red wine, and various berries that also has antiproliferative and anti-inflammatory activity. cis-Resveratrol is the double bond isomer of trans-resveratrol, the more often studied and naturally abundant of the two resveratrol isomers. cis-Resveratrol exhibits antioxidant activity in the µM range similar to that observed with trans-resveratrol. It bl…	LOPAC
-0.772485	0.486255	EPZ-5676	A highly potent DOT1L inhibitor	Epigenetic
-0.770988	0.621395	GERI-BP002-A	an inhibitor of acyl-CoA cholesterol acyltransferase	Natural
-0.769963	0.805588	LP44	high affinity 5-HT7 receptor agonist. Ki = 0.22 nM. LP44 displays selectivity over 5-HT1A and 5-HT2A receptors (200- and >1000-fold, respectively). LP44 induces relaxation of substance P-stimulated guinea pig ileum (EC50 = 2.56 μM).	LOPAC
-0.769203	0.395141	Zaleplon	a non-benzodiazepine agonist at the benzodiazepine site of the GABAA receptor; sedative; hypnotic.	FDA
-0.768963	0.716783	(-)-Cotinine	an alkaloid extracted from tobacco leaves. It can cross the blood-brain barrier. Cotinine is used to treat Alzheimer′s disease (AD), schizophrenia and post-traumatic stress disorder (PTSD).	LOPAC
-0.767618	0.784962	Ranolazine dihydrochloride	pFOX (partial fatty acid oxidation) inhibitor, a new class of anti-anginal drugs, which inhibit fatty acid beta-oxidation and activates pyruvate dehydrogenase, thereby diverting the heart′s energy source from lipids to glucose, which requires less oxygen and helps maintain myocardiac function at times of ischemia	LOPAC
-0.765565	0.486504	(-)-Eburnamonine	Cerebral metabolic stimulant; shows antihypoxic effects. Vasodilator.	Natural
-0.765346	0.675661	Brinzolamide	a carbonic anhydrase II inhibitor used to lower intraocular pressure.	LOPAC
-0.765098	0.322581	Quinidine·HCl·H2O	Class IA antiarrhythmic; potassium channel blocker; causes energy shifts from mitochondrial respiration to glycolysis.	Natural
-0.764806	0.648135	Caffeic acid phenethyl ester	exhibits several properties such as anticarcinogenic, immunomodulatory activities, antioxidant, antiviral, anti-inflammatory, hypoglycaemic effect, cardioprotective and inhibits gastric secretion. It also has an inhibitory effect on fibroblasts growth factor type 2 (FGF-2), a tumor growth factor in breast cancer. Caffeic acid phenethyl ester is a specific inhibitor of the nuclear transcription fa…	LOPAC
-0.764787	0.418798	Cyclopamine	A cell-permeable, steroidal alkaloid and cholesterol mimic that displays both teratogenic and anti-tumor properties. Disrupts cholesterol biosynthesis and specifically antagonizes shh (Sonic Hedgehog) signaling through direct interaction with Smo (smoothened), a protein that is related to G-protein-coupled receptors. Useful for studying the involvement of shh signaling in the development of vario…	Natural
-0.763934	0.651344	Oxybutynin Chloride	Muscarinic acetylcholine receptor antagonist; inhibits proliferation of bladder smooth muscle cells, perhaps by downregulation of growth promoting genes.	FDA
-0.763462	1.07388	Pyridostatin trifluoroacetate salt	Pyridostatin is a highly selective G-quadruplex interacting molecule. It retards the growth of human cancer cells by inducing replication/transcription dependent on DNA damage. Pyridostatin stabilizes G-quadruplexes, targeting the proto-oncogene SRC and telomeric G-quadruplexes, inducing DNA damage and cell-cycle arrest.	LOPAC
-0.762936	0.850989	S-Nitroso-N-acetylpenicillamine	Nitric oxide donor that mimics the actions of nitric oxide, including relaxation of isolated bovine coronary artery rings (EC50 = 130 nM). Markedly activates soluble guanylate cyclase. Induces apoptosis in mouse thymocytes. Note: 1 set = 4 x 5 mg.	LOPAC
-0.762394	0.798412	8-(3-Chlorostyryl) caffeine	Selective A2A adenosine receptor antagonist.	LOPAC
-0.762358	0.775097	SB-366791	A TRPV1 antagonist	LOPAC
-0.762112	0.705882	Galloflavin	An inhibitor of lactate dehydrogenase	LOPAC
-0.761726	0.60419	Methsuximide	A precursor for a calcium channel blocker	FDA
-0.760988	0.825918	Meloxicam sodium	A selective COX-2 inhibitor	LOPAC
-0.756963	0.742316	Felodipine	An L-type calcium channel inhibitor	FDA
-0.756572	0.710043	SR-95531	A GABAA receptor antagonist	LOPAC
-0.75205	0.529614	Sunitinib Malate	a small molecule inhibitor of receptor tyrosine kinases, including FLK1 (Ki = 9 nM), PDGFRβ (Ki = 8 nM), and FLT3. It is at least 10-fold selective for FLK1 and PDGFRβ over a variety of tyrosine kinases in a panel, including EGFR, Cdk2, Met, IGFR-1, Abl, and Src. Sunitinib inhibits VEGF-dependent FLK1 and PDGF-dependent PDGFRβ phosphorylation (IC50s = 10 and 10 nM, respectively) as well as phosph…	FDA
-0.750892	0.348485	Ropinirole·HCl	A dopamine D2 receptor agonist	FDA
-0.745806	0.450296	Hyoscyamine	A muscarinic receptor antagonist	Natural
-0.745033	0.65297	Salsoline	an antihypertensive agent	Natural
-0.744462	0.277548	Prasugrel	a prodrug form of the platelet purinergic P2Y12 receptor antagonist R-99224.1 Prasugrel (0.3 and 3 mg/kg) inhibits ex vivo washed platelet aggregation in rat platelet rich-plasma.2 In vivo, prasugrel prevents thrombus formation (ED50 = 0.68 mg/kg) and increases tail bleeding time in rats. Formulations containing prasugrel have been used in the prevention of blood clots.	FDA
-0.742188	0.768077	Pimprinine	anticonvulsant, antiplatelet, and antimicrobial properties.1,2,3,4 It inhibits deamination of serotonin by monoamine oxidase. Pimprinine (80 mg/kg) increases the minimum and maximum electroshock seizure thresholds in mice. In a mouse model of tremorine-induced tremors, it increases the latency to tremor onset, as well as reduces the intensity and duration of tremors and the analgesic activity of …	LOPAC
-0.740212	0.813187	Aurothioglucose	a gold compound used clinically to treat rheumatoid arthritis, has recently been found to be a potent PKCiota-Par6 interaction inhibitor, with an IC50 approximately 1 μM. Disruption of this interaction disrupts a rac1 signaling pathway that is required for transformed growth in non-small-cell lung cancer.	LOPAC
-0.740043	0.734108	1,3-Dipropyl-7- methylxanthine	Caffeine analog with some selectivity for A2 adenosine receptors.	LOPAC
-0.738316	0.844631	Propionylpromazine HCl	Phenothiazine antipsychotic; D2 dopamine receptor antagonist.	LOPAC
-0.738005	0.406336	Sulfamethoxazole	Sulfonamide antibiotic that blocks the synthesis of dihydrofolic acid by inhibiting the enzyme dihydropteroate synthase.	FDA
-0.735632	0.663908	Acepromazine maleate	a phenothiazine antipsychotic comonly used as a veterinary drug (horses, dogs and cats). The compound is an analogue antipsychotic drug chlorpromazine (#C8138). The drug is thought to block receptors of dopamine in the brain. Recently it was discover that the compound inhibits ABCG2 transported protein, which overexpression in tumors is associated with drug resistance.	LOPAC
-0.733928	1.13481	Procaine hydrochloride	a Na+ channel blocker, commonly used as an anesthetic agent and is considered safer than cocaine. It is also useful as a painkiller to treat pain, associated with joints and tendons.	LOPAC
-0.732305	0.644749	(-)-Epinephrine (+)-bitartrate	Epinephrine is mainly liberated from adrenal medulla in response to stress, that is facilitated through sympathetic fibers. Adrenergic receptor agonist.	LOPAC
-0.732294	0.709658	Estrone	an agonist for the estrogen receptor. The estradiol to estrone interconversion is favourable in menopause. Oral hormone replacement therapy (HRT) of estradiol-17β increases circulating levels of estrone.	LOPAC
-0.730761	0.637992	Thymoquinone	an inhibitor of Escherichia coli ATP synthase and cell growth. It is also used as a drug against lower limb ischemia-reperfusion injury of sciatic nerve and femoral muscle.	Natural
-0.729304	0.662316	Imipenem monohydrate	a broad spectrum B-lactam antibiotic. It is a member of the carbapenem class of "magic bullet" antibiotics for severe infections.	LOPAC
-0.729128	0.511521	α-Apo-Oxytetracycline	an Oxytetracycline (sc-205784) metabolite (broad spectrum antibiotic)	Natural
-0.728755	0.559579	Theobromine	An adenosine receptor antagonist	Natural
-0.726958	0.753236	5,7- Dichlorokynurenic acid	An NMDA receptor antagonist	LOPAC
-0.726392	0.797853	Loratadine	a non-sedating histamine H1-receptor antagonist. Shown to inhibit the two-pore domain potassium channel K2P18.1 (also called TRESK or KCNK18).	LOPAC
-0.726319	0.798067	Desipramine hydrochloride	a metabolite of imipramine and iofepramine is an active tricyclic antidepressant.	LOPAC
-0.726266	0.904322	Naphazoline hydrochloride	α-adrenoceptor agonist; imidazoline receptor agonist; vasoconstrictor.	LOPAC
-0.725484	0.682894	Nitazoxanide	an inhibitor of pyruvate-ferredoxin oxidoreductase (PFOR); Antimicrobial recently found to kill both non-replicating and replicating mycobacteria. FDA approved anti-parasitic drug (2002). Recent work highlights that NTZ kills non-replicating and replicating TB bacteria and no apparent resistance is detected.	FDA
-0.725357	0.269939	Sanguinarine	A natural product with antimicrobial, anti-inflammatory, and anti-oxidant properties. Has antiproliferative, pro-apoptosis effects in some cancer cell lines. Sanguinarine is a benzophenanthridine alkaloid isolated from plants belonging to the family Papaveracea. It exhibits anti-bacterial, anti-fungal, anti-inflammatory and anti-cancer properties. It induces cell cycle arrest and sensitizes cance…	Natural
-0.725357	0.694466	Tetrahydropapaverine·HCl	Phosphodiesterase inhibitor	Natural
-0.724328	0.704536	Clonidine hydrochloride	α2-adrenoceptor agonist; I1 imidazoline binding site ligand.	LOPAC
-0.71737	0.56557	Bromosporine	Bromodomains (BRDs) are protein-interaction modules that "read" ε-N-lysine acetylation motifs, such as those found in the N-terminal tails of histones. BRDs have been identified in chromatin-modifying enzymes (such as histone acetyltransferases (HATs)) as well as in transcription factors that regulate genes for cell cycle progression, signal transduction, apoptosis, and inflammation. Proteins con…	Epigenetic
-0.715208	0.345908	Decoyinine	A nucleoside analog and GMP synthase inhibitor	Natural
-0.71314	0.748998	Danshensu sodium salt	It reduces expression of the autophagy-associated proteins p62, LC3-II, and Beclin-1 and the apoptosis-related proteins Bax and caspase-3, prevents cardiomyocyte damage, and increases heart rate, coronary flow (CF), and left ventricular developed pressure (LVDP) in an isolated rat heart model of ischemia and reperfusion injury. Danshensu (60 mg/kg per day) reduces infarct size and improves left v…	LOPAC
-0.712882	1.0556	Pirenzepine dihydrochloride	An antagonist selective for mAChR subtype M1. Used for studying the functional roles of M1 receptors in both central and peripheral nervous systems.	LOPAC
-0.70965	0.548913	2'-Deoxy-5-fluorocytidine	A DNA methyltransferase inhibitor currently in clinical trials for breast cancer and other solid tumors. Like 5-Azacytidine and decitabine, 2'-Deoxy-5-fluorocytidine is a pyrimidine analog that integrates into chromatin to inhibit DNA methylation (ref 2). It blocks proliferation in colon cancer-derived HCT116 cells by activating DNA response pathways. It inhibits various strains of pathogenic avi…	Epigenetic
-0.709079	0.530311	Solasodine	a neuroprotective antioxidant glycoalkaloid of Solanum species. Solasodine increases superoxide dismutase (SOD), catalase (CAT),and glutathione (GSH) levels, while reducing lipid peroxidation (LPO) and nitric oxide (NO) levels in the brains of ischemia/reperfusion (I/R)-injury model in rats. Also, Solasonine displayed multiple activities including, anti-cancer and leishmanicidal activities.	Natural
-0.708943	0.67686	Vancomycin hydrochloride	Amphoteric glycopeptide antibiotic. Inhibits bacterial mucopeptide synthesis by forming complexes.	LOPAC
-0.708767	0.748167	Tetrabenazine	A cell permeable benzoquinolizine based compound that acts as a monoamine-depleting agent by blocking the activity vesicular monoamine transporter 2. Promotes late-stage differentiation of Pdx1-positive pancreatic progenitor cells into Neurog3 (Ngn3)-positive endocrine precursors without increasing their proliferation. Increases the number of insulin expressing cells in a dose dependent manner (E…	LOPAC
-0.708025	0.69761	(±)-6-Chloro-PB hydrobromide	a full D1 dopamine receptor agonist.	LOPAC
-0.706174	0.621799	Limonin	a triterpenoid aglycone that is a bitter principle of citrus fruits. It has anti-proliferative, proapoptotic activity on several cancer cell lines and inhibits azoxymethane-induced colon cancer in rats. It also inhibits HIV-1 replication in culturedf monocytes, macrophages, and mononuclear cells, perhaps by inhibition of HIV-1 protease activity.	Natural
-0.705622	0.784205	alpha,beta-Methylene adenosine 5'- triphosphate lithium salt	P2 purinoceptor agonist that is more potent than ATP at the P2X subtype.	LOPAC
-0.705223	0.68473	Clindamycin Palmitate·HCl	a water-soluble prodrug form of the antibiotic clindamycin. It undergoes rapid hydrolysis in vivo to release active clindamycin. Formulations containing clindamycin palmitate have been used in the treatment of various bacterial infections.	FDA
-0.703332	0.375959	Warfarin·Na	is a vitamin K antagonist, a coumarin derivative, and a racemic mixture of (+)-warfarin and (–)-warfarin. It is an anticoagulant that interferes with interconversion of vitamin K and vitamin K epoxide and the role of vitamin K in carboxylation of several clotting cascade proteins, inhibiting the initiation of clotting. Formulations containing warfarin have been used to treat and prevent blood clo…	FDA
-0.702698	1.02437	Tegaserod maleate	A potent 5-HT4 agonist	LOPAC
-0.702499	0.694571	Ketanserin tartrate	A potent 5-HT2 receptor antagonist	LOPAC
-0.701417	0.680137	Levalbuterol·HCl	the more active isomer of albuterol. Levalbuterol is a β-adrenergic agonist; a bronchodilator used clinically to treat asthma and COPD. Levalbuterol is (R)-albuterol that exhibits bronchodilator effect and is more effective than racemic albuterol for the treatment of exacerbation of asthma in pediatric populations.	FDA
-0.700032	0.951257	PPADS	Non-selective P2 purinoceptor antagonist which blocks responses at both pre- and post-junctional sites.	LOPAC
-0.699118	0.398072	Tiagabine·HCl	A potent uptake inhibitor highly selective for GABA Transport-1 (IC50 = 67 nM in vivo). Clinically used as an anticonvulsant. Often used in studies related to anxiety disorders and neural damages resulted from epileptics.	FDA
-0.69908	0.813126	Ro 61-8048	A cell-permeable thiazolylbenzenesulfonamide compound that acts as a potent, competitive and reversible inhibitor of kynurenine-3-monooxygenase activity (Ki = 4.8 nM; IC50 = 37 nM). Reported to increase the circulating levels of kynurenic acid (KYNA), an excitatory amino acid receptors antagonist, lower reactive oxygen species [ROS], reduce neuronal loss and enhance the survival rate in several n…	LOPAC
-0.698717	0.850134	Pancuronium·2Br	A highly potent competitive antagonist selective for nAChRs (IC50 = 5.5 nM). A very potent non-depolarizing skeletal muscle relaxant but no sedative or analgesic effects.	FDA
-0.698703	0.476629	Harmine	Central nervous system stimulant.	Natural
-0.696571	0.8492	1-Phenylbiguanide	a 5-hydroxytryptamine receptor agonist and increases extracellular dopamine release in rat nucleus accumbens in vivo. It serves as building block for synthesis of heterocyclic compounds.	LOPAC
-0.695309	0.657451	Milnacipran·HCl	Serotonin and norepinephrine reuptake inhibitor (SNRI)	FDA
-0.690248	0.734035	(S)-(-)-Sulpiride	Dopamine D2 receptor antagonist with good aqueous solubility. S-sulpiride (200 nm) was used to confirm that dopamine currents were mediated through the D2 receptor in whole animal rat brain preps. IC50 of 0.01012 µM Antagonist activity at human dopamine D2 receptor expressed in CHOp cells assessed as inhibition of quinopirole-induced mitogenisis.	LOPAC
-0.69017	0.845483	Diphenhydramine·HCl	H1 histamine receptor antagonist; Diphenhydramine hydrochloride (DPH) is an antihistaminic agent that relieves symptoms of hypersensitive reactions. It exhibits antimuscarinic and marked sedative effects. DPH is also used to prevent nausea, vomiting and vertigo of various causes. In addition, it acts as a potential therapeutic for insomnia.	FDA
-0.6887	0.733769	(-)-Scopolamine hydrobromide	A competitive, non-selective antagonist for muscarinic acetylcholine receptors (mAChR). Most effective at treating motion sickness. It is also a research tool for inducing memory impairment in vivo. Frequently used in researches related to learning, memory and Alzheimer′s dementia.	LOPAC
-0.688288	0.771413	Minoxidil	Minoxidil is originally used to treat hypertension, which also induces hypertrichosis. It is considered as a potent drug for treating androgenetic alopecia. Activates ATP-activated K+ channels; vasodilator; slow or stop hair loss and promote hair regrowth.	LOPAC
-0.687481	0.831479	GSK137647A	a selective agonist of the free fatty acid receptor 4 (FFA4/GPR120), which is involved in long-chain fatty acid stimulated GLP-1 secretion and has been implicated in glucose homeostasis, adiposity, and regulation of the anti-inflammatory response. GSK137647A has pEC50 values of 6.3, 6.2, and 6.1 for human, mouse and rat FFA4, and pEC50 values < 4.5 for all three species for FFA1, FFA2, and FFA3.	LOPAC
-0.686782	0.78198	L-741,626	Selective D2 dopamine receptor antagonist.	LOPAC
-0.685911	0.624228	Hypocrellin A	It is active against C. albicans, C. parapsilosis, and C. tropicalis fungi (IC50s = 0.65, 1, and 85 µg/ml, respectively), as well as S. aureus, methicillin-resistant S. aureus (MRSA), P. aeruginosa, and M. intracellulare bacteria (IC50s = 3, 7, 10, and 2.5 µg/ml, respectively). Hypocrellin A is also active against L. donovani promastigotes (IC50 = 0.27 µg/ml). Upon photoactivation with UV radiati…	Natural
-0.68543	0.69912	Diosmetin	a flavonoid that has been found in citrus fruits and has diverse biological activities. It inhibits the cytochrome P450 (CYP) isoforms CYP1A1 and CYP1B1 (Kis = 89 and 16 nM, respectively). Diosmetin prevents increases in erythrocyte reactive oxygen species (ROS) and malondialdehyde (MDA) levels induced by AAPH in a concentration-dependent manner. It reduces tumor growth and tumor blood vessel den…	Natural
-0.685227	0.683576	Terfenadine	A selective histamine H1-receptor antagonist	LOPAC
-0.682785	0.792547	MG 624	An antagonist of neuronal nicotinic AChRs	LOPAC
-0.682491	0.836923	NG-Nitro-L-arginine methyl ester HCl	Cell permeable. More soluble analog of arginine and a competitive, slowly reversible inhibitor of eNOS (IC50 = 500 nM). Causes a prolonged inhibition of acetylcholine-induced relaxation of rat aortic rings (IC50 = 400 nM).	LOPAC
-0.682072	0.741813	LDN-214117	a selective inhibitor of the bone morphogenetic protein (BMP) type I receptor kinases with high selectivity for BMP versus TGF-β signaling, and low cytotoxicity. LDN-214117 inhibited ALK2 most, with a biochemical IC50 of 24 nM, followed by TNIK, RIPK2, and ABL1. LDN-214117 has a cell-based IC50 for BMP6 of approximately 100 nM and 164-fold selectivity for BMP6 versus TGF-β1. Fibrodysplasia ossifi…	LOPAC
-0.680585	0.680498	Berberine·HCl	An alkaloid with weak antibiotic properties. Substrate for MDR efflux pumps. Antimicrobial activities of berberine is potentiated by the MDR inhibitor 5´-methoxyhydnocarpin (5´-MHC). Berberine upregulates the expression of Pgp in hepatoma cells. Treatment with berberine potentially results in the reduced accumulation of chemotherapeutic drugs.	Natural
-0.67952	0.398072	Ramelteon	a cell penetrant, potent and selective agonist at MT1/MT2 melatonin receptor that exhibits sleep-promoting properties. It is not binding to GABA receptor complex. Ramelteon is an analog of melatonin recently approved to treat insomnia.	FDA
-0.679226	0.819244	1-Methylhistamine dihydrochloride	Major metabolite of histamine by histamine N-methyltransferase.	LOPAC
-0.6781	0.351752	3-Beta-Indoleacrylic acid	helps to block the mycelial growth of Neurospora crassa. As a result, the cells accumulate indoleglycerol phosphate, which influences the rate of tryptophan synthetase.	Natural
-0.672815	0.329822	Emetine·2HCl	Principle alkaloid of ipecac, isolated from the ground roots of Uragoga ipecacuanha. Irreversibly blocks protein synthesis in eukaryotes by inhibiting the movement of ribosomes along the mRNA. Induces hypotension by blocking adrenoreceptors. Inhibits cytometric analysis of DNA replication at the early S phase. Also identified as a specific inhibitor of HIF-2α protein stability and transcriptional…	Natural
-0.670681	0.529954	Robinetin	results in increased expression of UGT1A1 mRNA, decreased activity of ABCC1 protein, increased expression of CYP1A1 mRNA and protein, decreased activity of ABCC2 protein (inhibited by AHR gene mutant form)	Natural
-0.67043	0.697488	PiB	A cell-permeable napthalenetetracarboxylic-bisimide compound that displays anti-proliferative properties (IC50< 5 µM against a panel of human cancer cell lines). Causes cell cycle arrest and acts as a potent, selective, reversible, competitive, active site binding inhibitor of Pin1/Par14 PPIase (peptidyl prolyl cis-trans isomerase) activity (IC50 = ~ 1.5 µM). Does not bind to DNA or functions as …	LOPAC
-0.66919	0.263043	Splitomicin	A cell-permeable and selective inhibitor of NAD+-dependent deacetylase activity of Sir2 protein (IC50 = 60 µM). Creates a phenocopy of the sir2 deletion mutant in S. cerevisiae and sensitizes mammalian cells to a variety of DNA-damaging agents by abrogating Sir2p activity on p53. Reported to act by either altering or blocking access to the acetylated histone-binding pocket.	Epigenetic
-0.668137	0.702778	2,4-Diamino-6-hydroxypyrimidine	A selective, specific inhibitor of GTP cyclohydrolase I	LOPAC
-0.667071	0.267903	Artesunate	an iron(II) oxide-reactive endoperoxide that generates reactive oxygen species (ROS) upon cleavage of its endoperoxide bridge. Artesunate inhibits proliferation of germinal center B cells in vitro and prevents development of arthritis via inhibition of germinal center formation and autoantibody production in the K/BxN mouse model of rheumatoid arthritis. It also inhibits alveolitis and pulmonary …	Natural
-0.666274	0.460243	Prostaglandin E2	A primary COX product of arachidonic acid. Its activity influences inflammation, fertility and parturition, gastric mucosal integrity, and immune modulation.	Natural
-0.66575	0.635563	Lagochiline	a polyphenolic natural product isolated from Lagochilus spp. which is thought to provide some of the benefits of the herb. The physiological, immunological, and toxicological properties of this compound remain to be determined.	Natural
-0.66458	0.718586	Gallamine triethiodide	An allosteric modulator of muscarinic acetylcholine receptors	LOPAC
-0.66413	0.847052	2-methoxyestradiol	a natural metabolite formed by CYP450-mediated hydroxylation followed by catechol-O-methyltransferase (COMT) methylation of estradiol. Administration of 2-hydroxy estradiol (2-HE2) to rats results in formation and clearance of 2-ME2 with t½ values of 7.9 and 24.9 minutes, respectively. 2-ME2 exhibits no affinity for estrogen receptors. 2-ME2 has achieved considerable attention as an anti-cancer a…	LOPAC
-0.663488	0.629972	Naftifine·HCl	an allylamine compound that blocks ergosterol biosynthesis in fungi by inhibiting squalene epoxidase (Ki = 1.1 µM for C. albicans epoxidase).	FDA
-0.662015	0.824646	Macelignan	a neuroprotective lingan isolated from nutmeg (Myristica fragrans) that protects dopaminergic neurons from inflammatory degeneration. Apparently, the neuroprotective effect of macelignan is mediated by PPARγ activation and arginase-1 expression. Macelignan inhibits LPS induced production of NO as well and inflammatory cytokines including TNF and IL- 1β in primary cultures of microglia.	LOPAC
-0.657744	0.744302	Suramin hexasodium	Non-selective P2 purinergic antagonist. Also blocks calmodulin binding to recognition sites and G protein coupling to G protein-coupled receptors. Increases open probability of ryanodine receptor (RyR) channels. Also acts as a competitive α1β2γ2 GABAA receptor antagonist. Anticancer and antiviral agent.	LOPAC
-0.655428	0.710623	GW2974	Potent and selective dual inhibitor of EGFR (IC50 = 0.016 mM) and ErbB-2 receptor tyrosine kinase.	LOPAC
-0.65499	0.661067	Diosmin	a flavonoid glycoside found in citrus fruits, hyssop, and rosemary. It is metabolized by intestinal bacteria to an aglycone form, diosmetin, which is thought to be more bioavailable. Diosmin has been shown to exhibit vasoprotective, anti-inflammatory, free-radical scavenging, and antimutagenic properties through its ability to inhibit prostaglandin E2 and thromboxane A2, as well as inhibiting leu…	Natural
-0.652884	0.795489	Lamotrigine isethionate	an anticonvulsant, water soluble salt of Lamotrigine	LOPAC
-0.651957	0.772034	R(+)-Butylindazone	Potent [K+,Cl-]-cotransport inhibitor that shows no side effects on the bumetanimide-sensitive [Na+,K+,Cl-]-cotransport system.	LOPAC
-0.6518	0.719713	SIB 1757	a highly selective mGluR5 metabotropic glutamate receptor antagonist. It non-competitively inhibits glutamate-induced increase in Ca2+ at human metabotropic glutamate receptor 1 (hmGluR1). Inhibition of mGlu5 receptor renders protection to neurons against methamphetamine-induced oxidative damage.	LOPAC
-0.651143	0.60228	Bezafibrate	Bezafibrate has the ability to repress HCV assembly and secretion. It is used to treat dyslipidemia. The peroxisome proliferator-activated receptor (PPAR) is a member of the steroid nuclear receptor superfamily. Bezafibrate is a peroxisome proliferator-activated receptor agonist for PPARα, PPARδ, and PPARγ. Lipoprotein lipase (LPL) activator. PPARgamma agonists, including Bezafibrate, have benefi…	LOPAC
-0.650933	0.591411	L-Canavanine sulfate	NOS inhibitor	LOPAC
-0.650125	0.391873	Silver Sulfadiazine	popularly used for treating second-degree burn wounds as it acts as an antimicrobial agent and prevents infections. Silver sulfadiazine-impregnated polyurethane (PU) foam, chitosan/chondroitin sulfate films may be used for wound dressing.	FDA
-0.649245	0.699057	Clomipramine hydrochloride	a tricyclic antidepressant, the 3-chlorinated derivative of imipramine. Like imipramine, clomipramine potently inhibits serotonin and norepinephrine reuptake (Kis = 7.4 and 96 nM, respectively). It also is an antagonist at histamine, muscarinic acetylcholine, α1-adrenergic, and dopamine receptors (Kds = 31, 37, 38, and 190 nM for H1, M1, α1, and D2, respectively).	LOPAC
-0.644799	0.440027	Isotetrandrine	a biscoclaurine alkaloid which inhibits G-protein mediated activation of phospholipase A2 (PLA2) but not phospholipase C (PLC) or D (PLD). Cell permeable.	Natural
-0.642143	0.595369	Natamycin	natamycin is used to treat fungal infections, including Candida, Aspergillus, Cephalosporium, Fusarium, and Penicillium. Natamycin blocks fungal growth by binding specifically to ergosterol with an apparent affinity of ~100 μM, but it does not permeabilize cell membranes as other polyene antibiotics are known to do. Natamycin is also used in the food industry as a preservative.	FDA
-0.641992	0.538925	Brimonidine	An α2-adrenergic receptor agonist	FDA
-0.640409	0.356469	Aconitine	Neurotoxin. Activates tetrodotoxin-sensitive Na+ channels, inducing presynaptic depolarization, thus blocking the nerve action potential which, in turn, blocks the release of neurotransmitters and decreases the end plate potential at the neuromuscular junction. Aconitine also blocks norepinephrine reuptake. In the heart, aconitine induces ventricular tachycardia after intracoronary injection. In …	Natural
-0.640303	0.439394	Tetrabenazine	A cell permeable benzoquinolizine based compound that acts as a monoamine-depleting agent by blocking the activity vesicular monoamine transporter 2. Promotes late-stage differentiation of Pdx1-positive pancreatic progenitor cells into Neurog3 (Ngn3)-positive endocrine precursors without increasing their proliferation. Increases the number of insulin expressing cells in a dose dependent manner (E…	FDA
-0.640301	0.741693	Diclofenac sodium	A cell-permeable, non-selective cyclooxygenase inhibitor (IC50 = 60 nM and 200 nM for ovine COX-1 and COX-2 respectively) and potent non-steroidal anti-inflammatory drug with analgesic activity. Strongly inhibits insoluble transthyretin (TTR) amyloid fibril formation. Also inhibits liver phenol sulfotransferase activity (IC50 = 9.5 µM).	LOPAC
-0.639691	0.816362	5-Carboxamidotryptamine hemiethanolate maleate	An agonist at 5-HT1A, 5-HT1B, 5-HT1D, 5-HT5 and 5-HT7 serotonin receptors.	LOPAC
-0.639492	0.634921	CNS-1102	A non-competitive, subunit non-selective, potent antagonist for NMDA receptors (IC50 = 0.13, 0.068, 0.087, and 0.14 µM for NR2A - D, respectively). Widely used as neuroprotective agent after acute traumatic brain injury and stroke in animal researches.	LOPAC
-0.63853	0.703136	Entecavir	an antiviral guanine analog that inhibits reverse transcription, DNA replication and transcription in the viral replication process. Entecavir is used to treat hepatitis B.	LOPAC
-0.638256	0.554976	Amcinonide	a synthetic corticosteroid. Topical administration of amcinonide reduces inflammation in rat models of carrageenan-induced plantar edema and air pouch granulomas (ID50s = 1.85 and 4.2 mg/kg, respectively).	FDA
-0.637822	0.778942	(-)-Tetramisole hydrochloride	Shows both immunostimulant and immunosuppressant effects, depending on several controllable factors. Very effective in treatment of ascariasis (hookworm infestation). Useful in chemotherapy of colorectal cancers, possibly due to its stimulation of IL-1 production and direct activation of macrophages.	LOPAC
-0.636815	0.307545	Australine·HCl	a pyrrolizidine alkaloid originally isolated from C. australe that has enzyme inhibitory activities. It is an inhibitor of glucoamylase (IC50 = 5.8 µM) that also inhibits glucosidase I, sucrase, maltase, and A. niger α-glucosidase (IC50s = 20, 28, 35, and 28 µM, respectively). Australine is selective for these enzymes over glucosidase II, α- and β-mannosidase, and α- and β-galactosidase up to 500…	Natural
-0.636733	0.641123	Urapidil hydrochloride	An α1-AR antagonist and 5-HT1A receptor partial agonist	LOPAC
-0.63659	0.670695	Artemether	an antiparasitic compound and a derivative of artemisinin. It induces mortality in adult wild-type and pfatp6-mutant P. falciparum but the efficacy is decreased in the mutants (IC50s = 8.2 and 13.5 nM, respectively). Artemether reduces parasitemia in P. falciparum-infected monkeys and P. berghei-infected mice with 50% curative dose (CD50) values of 7.1 and 55 mg/kg, respectively. It also reduces …	LOPAC
-0.636245	0.388413	Morin	a flavonoid with antioxidant properties. It has been shown to protect cells against oxygen radical damage. Morin not only scavenges oxyradicals, but also moderately inhibits xanthine oxidase, a free-radical generating enzyme. At concentrations of 75-100 micromolar, morin inhibits oxidation of low density lipoprotein (LDL) by free radicals or Cu2+. Morin has been reported to inhibit rat brain phos…	Natural
-0.635832	0.848165	Metoclopramide hydrochloride	D2 antagonist; 5-HT3 antagonist; antipsychotic; anti-emetic.	LOPAC
-0.635274	0.66103	Thioperamide maleate	Potent and selective H3 histamine receptor antagonist that crosses the blood-brain barrier. It affects the central histaminergic system and decreases the duration of seizures and convulsions in mice. It also improves learning deficit induced by other drugs such as scopolamine.	LOPAC
-0.633765	1.0853	Quinacrine dihydrochloride	has anthelmintic functionality and used in the female sterilization. It is used to treat systemic lupus erythematosus and rheumatic diseases. Apart from malaria, Quinacrine is effective for treating giardia and tapeworm infections. It inhibits nicotinamide adenine dinucleotide phosphate (NADPH) oxidase activity in addition to monoamine oxidase inhibition. Non-selective MAO-A/B inhibitor.	LOPAC
-0.629981	0.635739	Micafungin	a semisynthetic echinocandin antifungal. Micafungin works by inhibiting the enzyme β(1,3)-D-Glucan synthase and thereby disturbing the integrity of the fungal cell wall. This enzyme does not exist in mammalian systems.	FDA
-0.628904	0.712118	Furamidine dihydrochloride	binds to strings of AT base pair sequences in DNA′s minor groove. Furamidine was originally developed as an anti-parasitic compound for a variety of diseases including Chagas′ disease. Furamidine targets AT rich sequences in trypanosome kinetoplast minicircle DNA (kDNA), resulting in subsequent destruction of the kinetoplast and cell death. Furamidine has also been found to inihbit tyrosyl-DNA ph…	LOPAC
-0.628745	0.380435	Varenicline Tartrate	a partial α4β2 nicotinic receptor agonist and α7 full agonist. Varenicline competitively binds to α4β2 receptors and partially stimulates without creating a full nicotine effect, while simultaneoudly blocking the ability of nicotine to bind to the receptors. Varenicline thus blocks the ability of nicotine to activate α4β2 receptors and stimulate the central nervous mesolimbic dopamine system, bel…	FDA
-0.628359	0.443708	Ketopinic acid	a chiral ketone.	Natural
-0.628359	0.632311	Retrorsine	a cytotoxic pyrrolizidine alkaloid compound	Natural
-0.628009	0.79366	O-Methylserotonin hydrochloride	Nonselective serotonin receptor agonist that lacks affinity for the 5-HT3 receptor.	LOPAC
-0.627785	0.68011	Triptorelin Acetate	decreases pituitary secretion of gonadotropins luteinizing hormone (LH) and follicle stimulating hormone (FSH)	FDA
-0.625574	0.803671	N-omega-Methyl-5-hydroxytryptamine oxalate salt	Serotonin receptor ligand.	LOPAC
-0.625069	0.713558	Zibotentan	inhibit cell proliferation, invasion and metastasis in cancer models. In clinical trials on patients with castration-resistant prostate cancer and bone metastasis, who were pain-free or had mild pain, zibotentan treatment resulted in better overall survival as compared to placebo. Zibotentan is a potent and selective endothelin ET(A) receptor antagonist with an IC50 of 21 nM for the ETA receptor …	LOPAC
-0.624863	0.646159	U-101958 maleate	a selective D4 dopamine receptor antagonist. Studies have reported that U-101958 maleate cannot inhibit bromocriptine-mediated [3H]thymidine incorporation in opossum kidney (OK) cells	LOPAC
-0.624491	0.428571	Spectinomycin	acts by inhibiting protein synthesis and elongation by binding to the bacterial 30S ribosomal subunit and interfering with peptidyl tRNA translocation.	Natural
-0.624037	0.513477	Kenpaullone	a Cdk and GKS-3 inhibitor	Natural
-0.623542	0.607631	Hespertin	a citrus flavonoid that has been reported to lower plasma cholesterol. Hesperetin reduces the transcription of ACAT-2 mRNA in HepG2 cells and reduces ApoB protein synthesis in a dose-dependent manner. The EC50 for these responses is approximately 50 µM. Hesperetin also inhibits histamine release from IgE-challenged RBL-2H3 cells, with a potency comparable to the antihistamine azelastine.	Natural
-0.622774	0.450135	Rapamycin	an allosteric inhibitor of the mammalian target of rapamycin (mTOR) complex 1 (mTORC1). It interacts with FKBP prolyl isomerase 1A (FKBP12) to form a complex that binds to and inhibits the kinase activity of mTORC1. Rapamycin inhibits growth of Rh1 and Rh30 rhabdomyosarcoma cells in serum-free medium, with 50% inhibition observed at concentrations of 0.1 and 0.5 ng/ml, respectively, and increases…	Natural
-0.622032	0.821021	LP 12 hydrochloride hydrate	a 5-HT7 receptor agonist displaying selectivity over D2, 5-HT1A and 5-HT2A receptors (Ki values are 0.13, 224, 60.9 and 1464 nM, respectively. It also displays selectivity over D2, 1723; over 5-HT1A, 468; over 5-HT2A, 11261; and high potency.	LOPAC
-0.621811	0.660662	Magnolol	a bioactive plant component isolated from the root and stem bark of Magnolia officinalis with antifungal, antibacterial and antioxidant effects. Magnolol also demonstrates anti-inflammatory activity by interferring with NF-κB signaling. It also appears to have anti-inflammatory properties related to vascular disorders such as atherosclerosis due to its ability to inhibit IL-6-induced STAT3 activa…	Natural
-0.620619	0.620585	Rubescensin A	High affinity NLRP3 inflammasome inhibitor	Natural
-0.62025	0.338154	Tolvaptan	Potent and selective vasopressin V2 receptor antagonist; renoprotective and orally active	FDA
-0.619577	0.463612	9-cis-Retinoic acid	An agonist of RAR and RXR isoforms	Natural
-0.619508	0.776981	Doxofylline	A PDE inhibitor with bronchodilator activity	LOPAC
-0.619095	0.729388	Erdosteine	inhibits LPS-induced IκB kinase (IKK) activity, NF-κB-mediated transcription, and production of IL-6 and IL-1β in RAW 264.7 cells. Erdosteine (7.5 mg/kg) prevents depletion of renal catalase and glutathione peroxidase (GPX) and increases in renal malondialdehyde (MDA) and nitric oxide (NO) levels in a rat model of nephrotoxicity induced by cisplatin. It reduces spinal cord lipid peroxidation and …	LOPAC
-0.61905	0.328076	CPI203	A bioavailable inhibitor of BET bromodomains	Epigenetic
-0.618431	1.0358	DFU	an orally available highly selective cyclo-oxygenase-2 (COX-2) inhibitor that potently inhibits lipopolysaccharide (LPS)-induced PGE2 production in a human whole blood assay.	LOPAC
-0.618263	0.580257	L-Ascorbic Acid	mainly exhibits antioxidant properties. It protects plants from oxidative stress and mammals from diseases associated with oxidative stress. L-ascorbic acid mainly protects from hydroxyl radicals, superoxide and singlet oxygen. In addition, it also reduces the membrane-linked antioxidant α-tocopherol (oxidised form). L-Ascorbic acid enhances endothelium-dependent vasodilation in various disorders…	FDA
-0.618103	0.466754	Quassin	a primary reference substance with assigned absolute purity	Natural
-0.617629	0.868736	Propofol	a short-acting, hypnotic drug intravenously administered for the induction and maintenance of general anesthesia and sedation.	FDA
-0.616244	0.262788	Caffeic acid	A cell-permeable natural dietary compound reported to have anti-carcinogenic and anti-inflammatory properties. A selective, non-competitive inhibitor of 5-lipoxygenase (ID50 = 3.7 µM). Inhibits Cu2+-induced LDL oxidation in the initiation phase but acts as a prooxidant in the propagation phase. An effective irreversible inhibitor of glutathione S-transferases and a non-competitive inhibitor of xa…	Natural
-0.614456	0.652023	Niacin (Known As Vitamin B3, Nicotinic Acid And Vitamin Pp)	involved in the production of nicotinamide adenine dinucleotide (NAD+), which is used in the adenine triphosphate (ATP) production in mitochondrial oxidative phosphorylation. It also decreases hepatic production of very-low density lipoproteins (VLDL), and apolipoprotein B (apo-B). Niacin deficiency leads to pellagra.	FDA
-0.611706	0.536388	Prostaglandin F2α	a widely distributed PG occurring in many species. It causes contraction of vascular, bronchial, intestinal, and myometrial smooth muscle, and also exhibits potent luteolytic activity. PGF2α exerts its receptor mediated physiological activity at 50-100 nM. Maximal ovine myometrial contraction can be achieved at 125 nM PGF2α in vitro.	Natural
-0.610507	0.848059	(±)-Normetanephrine hydrochloride	Norepinephrine metabolite	LOPAC
-0.610434	0.622204	16-Oxokahweol	a synthetic diterpene and derivative of kahweol. It increases cytosolic glutathione S-transferase (GST) activity and acid-soluble sulfhydryl levels in mouse liver and small bowel mucosa when administered at a dose of 10 µmol/animal once per day for three days.	Natural
-0.610168	0.530612	Tryptanthrin	an alkaloid tryptophan derivative originally isolated from various plants and found to have antimicrobial actions. Among its many actions in cells, it inhibits both 5-lipoxygenase and cyclooxygenase-2 (IC50s = 600 and 64 nM, respectively). Tryptanthrin suppresses angiogenesis in vivo and blocks signaling through VEGFR2 at the level of ERK1/2 signaling in vitro. It also prevents ERK signaling thro…	Natural
-0.609606	0.710039	Spiperone	Selective D2 dopamine receptor antagonist; α1B-adrenoceptor antagonist; mixed 5-HT2A/5-HT1 serotonin receptor antagonist; antipsychotic.	LOPAC
-0.609531	0.670003	Nevirapine	interacts with glycine 190 residue of human immuno deficiency virus (HIV-2) reverse transcriptase. It is an antiretroviral drug which increases bile synthesis and activates electron transport chain. Use of nevirapine leads to liver toxicity and is associated with Nevirapine hypersensitivity syndrome. Nevirapine is an allosteric, non-nucleoside inhibitor of HIV reverse transcriptase (NNRTI). The K…	FDA
-0.608962	0.38292	Streptozotocin	a glucosamine-nitrosourea which is commonly used to induce experimental diabetes in animals. It specifically targets beta cells, entering via the glucose transporter GLUT2 and causing alkylation of DNA. DNA damage induces activation of poly ADP-ribosylation, depletion of cellular NAD+ and ATP, and formation of superoxide radicals, leading to the destruction of beta cells. The effectiveness of STZ…	FDA
-0.607757	0.76412	(±)-Ibuprofen	A non-selective and reversible COX inhibitor	LOPAC
-0.606962	0.27686	a potent inhibitor of dipeptidyl peptidase 4 (DPP-4; IC50 = 18 nM). It is selective for DPP-4 over DPP-8 (IC50 = 48 µM) as well as several other peptidases, including DPP-9, DPP-2, and amino peptidase P. (–)-Sitagliptin improves glucose tolerance in insulin-resistant Zucker fatty and high-fat diet fed rats as well as ob/ob and high-fat diet fed mice. It also reduces hyperglycemia in mice fed a hi…	a topical anesthetic prepared as a sterile aqueous ophthalmic solution.	FDA
-0.606484	0.790556	GANT61	GANT61 blocks hedgehog pathway signaling by inhibiting the transcripional activity of Gli1 (IC50 = 5 μM). GANT 61 led to a regression of 22Rv1 human prostate tumor cell xenografts in nude mice.	LOPAC
-0.603702	0.459513	Carminic acid	an anthraquinone glucoside-containing small molecule natural product	Natural
-0.602977	0.431129	Sitagliptin Phosphate	a potent inhibitor of dipeptidyl peptidase 4 (DPP-4; IC50 = 18 nM). It is selective for DPP-4 over DPP-8 (IC50 = 48 µM) as well as several other peptidases, including DPP-9, DPP-2, and amino peptidase P. (–)-Sitagliptin improves glucose tolerance in insulin-resistant Zucker fatty and high-fat diet fed rats as well as ob/ob and high-fat diet fed mice.3 It also reduces hyperglycemia in mice fed a h…	FDA
-0.602262	0.567959	Matrine	inhibits LPS-induced splenocyte proliferation and release of IL-1 and IL-6 from mouse peritoneal macrophages in vitro. In mice, administration of matrine inhibits the development of LPS-induced hepatitis in a dose-dependent manner. Matrine reduces production of the hepatitis B surface antigen (HBsAG) and serum antigen (HBeAG) with IC50 values of 0.75 and 3.35 mg/mL, respectively, in vitro and inh…	Natural
-0.602034	0.614918	Madecassic acid	diverse anti-inflammatory and anti-diabetic effects, blocking NF-κB activation in macrophages and altering lipid metabolism in mice, at least in part through antioxidant actions.	Natural
-0.600098	0.71695	PAPP	Selective 5-HT1A serotonin receptor agonist and 5-HT1D serotonin receptor antagonist	LOPAC
-0.597325	0.686694	Tetracaine hydrochloride	Blocks voltage-sensitive release of Ca2+ from sarcoplasmic reticulum.	LOPAC
-0.597262	0.824615	(+-)-Muscarine chloride	Prototype muscarinic acetylcholine receptor agonist; active enantiomer.	LOPAC
-0.59627	0.904798	H2L5186303	A selective LPA2 receptor antagonist	LOPAC
-0.595905	0.471074	Terbutaline Hemisulfate	a β-adrenoceptor agonist and is known to function as a bronchodilator. Studies have reported that terbutaline is potent inhibitor of premature labor	FDA
-0.595682	0.558648	Tropine	a naturally-occurring tropane alkaloid extracted primarily from plants of the Solanaceae family. It serves as an intermediate in the synthesis of a variety of bioactive alkaloids, including atropine, benztropine, and scopolamine, many of which have potent neurological actions.	Natural
-0.595598	0.694215	L-Glutamic acid hydrochloride	plays key roles in development, learning, memory, plasticity and cognition. It plays crucial role in the pathogenesis of neuropathological diseases such as epilepsy, schizophrenia, stroke, ischemia, ALS (amyotrophic lateral sclerosis), Huntington’s disease and Parkinson’s disease. Glutamate is also responsible for the activation of long-term potentiation (LTP) and long-term depression (LTD). Indu…	LOPAC
-0.594632	0.432615	Mevastatin	An antibiotic that acts as a potent inhibitor of HMG-CoA reductase, thus suppresses Ras farnesylation. Inhibitor of myoblast fusion. Causes cell cycle arrest in late G1 phase. May induce bone morphogenic protein-2 (BMP-2). This product requires activation for use in cell culture and cell-free assay systems. To activate, treat with ethanol solution with 1 N NaOH and then neutralize with 1 N HCl to…	Natural
-0.592151	0.667431	Felbamate	an antiepileptic drug used for the treatment of epilepsy, partial seizures in adults, and partial and generalized seizures associated with Lennox-Gastautsyndrome in children.	LOPAC
-0.590436	0.734079	N-Allyl-(±)-SKF-38393 hydrobromide	a selective agonist of D1/D5 dopamine receptors. It mimics the physiological action of dopamine and enhances cognition, memory and learning. It decreases the age-related decline in long-term potentiation of mouse hippocampus. SKF-38393 increases the D1-mediated locomotion in rats.	LOPAC
-0.589945	0.342711	Acivicin	an inhibitor of GGT used for solid tumor research	Natural
-0.589312	0.376011	Parthenolide	Anti-inflammatory agent that inhibits NF-κB activation.	Natural
-0.589287	0.862711	CR 2249	Facilitates glycine action at NMDA glutamate receptors; may identify a separate allosteric modulatory site on the NMDA receptor; putative cognition enhancer.	LOPAC
-0.586808	0.683115	5-Fluorouracil	A potent antitumor agent that affects pyrimidine synthesis by inhibiting thymidylate synthetase, thus depleting intracellular dTTP pools. It is metabolized to ribonucleotides and deoxyribonucleotides, which can be incorporated into RNA and DNA. Treatment of cells with 5-FU leads to an accumulation of cells in S-phase and has been shown to induce p53 dependent apoptosis.	LOPAC
-0.586332	0.729162	SCH-28080	a potent inhibitor of gastric H+ and K+-ATPase. The novel antiulcer agents, SCH-28080 and SCH-32651 were examined for their ability to inhibit the H+K+ ATPase enzyme activity in a preparation of microsomal membranes from rabbit fundic mucosa. SCH- 28080 inhibited the isolated enzyme activity with a potency similar to omeprazole, IC50s of 2.5 and 4.0 μM respectively. SCH 32651 was less potent exhi…	LOPAC
-0.586041	0.393301	Homoorientin	a flavonoid that has been found in G. olivieri and has diverse biological activities. It induces apoptosis in and reduces cell viability of PATU-8988 and PANC-1 pancreatic cancer cells in a concentration-dependent manner. Isoorientin reduces expression of COX-2, IL-6, 5-lipoxygenase (5-LO), and TNF-α in RAW 264.7 cells. In vivo, isoorientin (20 mg/kg) reduces carrageenan-induced paw edema and air…	Natural
-0.586041	0.612903	(+)-Gibberellic acid	a diterpene fungal metabolite and plant hormone that has been found in Gibberella and various plants. It induces production of α-amylase to stimulate seed germination in cereal grains and stimulates photo- and skoto-morphogenesis and internode elongation in Arabidopsis. Gibberellic acid (150 μg per animal) increases testicular 3β-hydroxysteroid dehydrogenase (3β-HSD) and 17β-HSD activities and te…	Natural
-0.585563	0.768894	Papaverine hydrochloride	originally used to resolve male impotence. Smooth muscle relaxant and cerebral vasodilator; phosphodiesterase inhibitor.	LOPAC
-0.585134	0.539727	Bethanechol Chloride	A muscarinic acetylcholine receptor agonist	FDA
-0.583674	0.428571	Deltaline	An antiarrhythmic; fast inward Na+ current blocker.	Natural
-0.582842	0.579808	Droxinostat	a selective inhibitor of HDAC3, HDAC6, and HDAC8.	LOPAC
-0.5825	0.634598	Citalopram hydrobromide	A potent uptake inhibitor highly selective for 5-HT transporter without effect on noradrenalin or dopamine uptake (IC50 = 1.8, 8800 and 41000 nM for 5-HT, noradrenalin and dopamine, respectively). Clinically prescribed as an antidepressant drug. Widely used in research related to depressive disorders.	LOPAC
-0.581952	0.629633	Penicillamine (D-Penicillamine)	an orally bioavailable copper chelator and penicillin degradation product. It increases urinary and fecal copper excretion and decreases liver copper concentration in a rat model of copper overload when administered at 0.67 mmol/kg per day, but does not affect kidney, spleen, or brain copper levels. Penicillamine (100 mg/kg per day) dissolves copper-rich granules in hepatic lysosomes of Long-Evan…	FDA
-0.581082	0.407025	Tirofiban·HCl monohydrate	A GPIIb/IIIa antagonist	FDA
-0.580302	0.455646	Eriodictyol	a bitter-masking flavonoid with potential antioxidation activity. Eriodictyol may be used to study it mechanism of IgE/Ag-induced type I hypersensitivity inhibition at the level of mast cell degranulation and ceramide kinase activity. Eriodictyol may be studied to understand its potential antidiabetic activity and its neuroprotective activity via activation of Nrf2/ARE signaling pathway.	Natural
-0.580302	0.589824	Dipterocarpol	a useful chiral building block for steroid derivatives	Natural
-0.579531	0.684876	Chlorothiazide	a first-in-class thiazide diuretic initially discovered from its ability to inhibit carbonic anhydrase in vitro. As an antihypertensive agent, this thiazide increases renal excretion of sodium, potassium, chloride, and bicarbonate ions by inhibiting tubular reabsorptive mechanisms.	LOPAC
-0.578892	0.7763	NS 1619	A BKCa channel opener	LOPAC
-0.578347	0.635948	Pyrazine carboxamide	The active moiety of pyrazinamide is pyrazinoic acid (POA). POA is thought to disrupt membrane energetics and inhibit membrane transport function at acid pH in Mycobacterium tuberculosis. Iron enhances the antituberculous activity of pyrazinamide. Pyrazinamide and its analogs have been shown to inhibit the activity of purified FAS I.	LOPAC
-0.578342	0.751587	3,4-Dihydroxyphenylacetic acid	a normal constituent of rat brain tissue. A mass fragmentographic method for determination of DOPAC in rat brain tissue has been described. It is major metabolite of dopamine (DA). The voltammetric reduction of DOPAC has been studied at a glassy carbon electrode modified with single-wall carbon nanotubes (SWNTs). Semi-automatic fluorometric assay technique for DOPAC has been reported.	LOPAC
-0.578171	0.699646	Trifluoperazine dihydrochloride	Phenothiazine antipsychotic; D2 dopamine receptor antagonist; inhibits calmodulin-dependent stimulation of 3′:5′-cyclic nucleotide phosphodiesterase; inhibits cAMP-gated cation channels. Trifluoperazine dihydrochloride is useful in treating schizophrenia, disturbed behavior, severe anxiety, nausea and vomiting.	LOPAC
-0.577751	0.280051	CAPE	A cell-permeable active component of propolis from honeybee hives. Known to have antiviral, anti-inflammatory, and immunomodulatory properties. An inhibitor of HIV-1 integrase activity. Inhibits the growth of different types of transformed cells. Has been reported to suppress lipid peroxidation. Inhibits ornithine decarboxylase, protein tyrosine kinase (PTK) and lipoxygenase activities. Also indu…	Natural
-0.576998	0.439763	Strychnine·HCl	a potent convulsant, which is extracted from Strychnos nux vomica seeds. At high doses, the compound causes convulsions and ultimately death due to respiratory paralysis. Strychnine acts as a respiratory, circulatory and digestive stimulant. Convulsant; glycine receptor antagonist not associated with the NMDA receptor.	Natural
-0.576897	0.7503	Semicarbazide hydrochloride	a general reagent used to synthesize semicarbazones from aldehydes and ketones. It can be used to build a variety of heterocyclic compounds, some of which are potent antimicrobial and antiviral agents. It can also be used to prepare corrosion inhibitors.	LOPAC
-0.576491	0.634647	U-74389G maleate	an antioxidant which prevents iron-dependent lipid peroxidation. It protects against ischemia-reperfusion injury in animal heart, liver, and kidney models.	LOPAC
-0.575424	0.695354	Prilocaine hydrochloride	an analytical reference standard categorized as a local anesthetic.	LOPAC
-0.575285	0.725362	Chidamide	HDAC inhibitor	Epigenetic
-0.574169	0.68274	MB-3	MB-3 is a Gcn5 HAT (Histone Acetyltransferase) inhibitor; anti-inflammatory, anti-carcinogenic.	Epigenetic
-0.571151	0.700489	Fluspirilene	Dopamine receptor antagonist; antipsychotic; calcium channel blocker.	LOPAC
-0.570778	0.586985	Minocycline·HCl	a broad spectrum antibiotic with bacteriostatic function. Minocycline has anti-inflammatory properties. Minocycline inhibits lipopolysaccharide mediated inflammatory cytokine tumour necrosis factor (TNF-α) secretion by macrophages. Minocycline inhibits macrophage proliferation in a dose dependent manner. Minocycline inhibits neuroinflammation in pre-plaque of Alzheimer′s disease-like amyloid path…	Natural
-0.570668	0.687842	Lopinavir	an antiviral HIV Protease Inhibitor. Lopinavir has insufficient bioavailability alone, so it is used in therapy in combination with Ritonavir, a HIV protease inhibitor, which inhibits cytochrome P450-3A4 (CYP3A4), a liver enzyme that normally metabolizes protease inhibitors. Lopinavir also has an ability to inhibit ZMPSTE24 (zinc metallopeptidase STE24).	FDA
-0.570321	0.685761	Honokiol	a natural product derived from parts of the plant M. grandiflora used in Oriental herbal medicine. It is a lignan that produces diverse therapeutic effects, including acting as an anxiolytic in mice. Honokiol also inhibits nuclear factor-κB and phosphoinositide 3-kinase/Akt signaling, preventing inflammation, and interferes with angiogenesis while preventing tumor growth in vivo. It also scavenge…	Natural
-0.570288	0.77803	Auraptene	a coumarin derived from citrus plants that bears a geranyloxyl moiety at its C-7. It has anti-inflammatory, anti-carcinogenic, anti-bacterial, neuroprotective, and hepatoprotective activities. It inhibits leukocyte activation and induces phase II enzymes during the initiation phase of carcinogenesis. When examined for its potential use in Alzheimer’s disease treatment, auraptene was shown to inhi…	LOPAC
-0.569829	0.999238	BF-170 hydrochloride	a new probe for neurofibrillary tangles (tau fibrils). It exhibits greater binding affinity to tau than to Aβ fibrils, EC50 = 221 nM vs. EC50 = 786 nM (Ki for Aβ > 5,000 nM). BF-170 demonstrates fast clearance from the brain; clearly visualizes neurofibrillary tangles, neuropil threads, and paired helical filament-type neuritis. BF-70 may become one of the candidate compounds for in vivo imaging …	LOPAC
-0.56796	0.43318	Nonactin	a macrotetrolide that forms complexes with alkali cations, such as potassium and sodium. Nonactin has been reported to inhibit the processing of cytoplasmic precursor proteins destined for the mitochondria. Nonactin is an uncoupler of oxidative phosphorylation	Natural
-0.56763	0.487869	Epirubicin·HCl	A cell-permeable antitumor antibiotic. A stereoisomer of Doxorubicin that exhibits reduced cardiotoxicity. Its antitumor actions are mediated by targeting topoisomerase II.	FDA
-0.566329	0.555979	Triflusal	an anti-inflammatory antithrombotic platelet aggregation inhibitor with a 3-fold mechanism of action. It is an irreversible inhibitor of COX-1 inhibiting thromboxane A2, preventing aggregation; it preserves vascular prostacyclin, thus promoting anti-aggregant effect. Triflusal blocks phosphodiesterase leading to an increase in cAMP levels promoting anti-aggregant effect due to inhibition of calci…	LOPAC
-0.566058	0.305785	Trandolapril	Studies have reported that trandolapril inhibits atherosclerosis and decreases the occurrence of atrial fibrillation. Trandolapril is an ACE inhibitor. Trandolapril differs from other ACE inhibitors in that it has a longer biological half-life and a high degree of lipophilicity.	FDA
-0.564039	0.331956	Selegiline·HCl	Selective MAO-B inhibitor; anti-Parkinsonian agent.	FDA
-0.564002	0.797853	Lidocaine hydrochloride	Na+ channel blocker; class IB antiarrhythmic that is rapidly absorbed after parenteral administration	LOPAC
-0.563624	0.744701	Riluzole	An inhibitor of glutamatergic transmission	LOPAC
-0.563086	0.588245	Nebivolol·HCl	a potent and selective β1-adrenergic receptor (β1-AR) antagonist (IC50s = 7.41 and 251 nM for β1- and β2-ARs, respectively in a radioligand binding assay using rabbit lung membrane preparations). It is also selective for β1-ARs over serotonin 5-HT1A and 5-HT2, α1- and α2-adrenergic, histamine H1, and dopamine D2 receptors (IC50s = 27.5 and 2,239, 3,162 and >10,000, 5,623, and 10,000 nM, respectiv…	FDA
-0.563059	0.708323	Diindolylmethane	Acid-catalyzed reaction product of a phytochemical naturally found in Brassicaceae, indole-3-carbinol. It functions as an antitumor agent. This derivative can both directly stimulate apoptosis at relatively high concentrations and sensitize TRAIL-induced apoptosis in human cancer cells. DIM induces a G1 cell cycle arrest in human breast cancer MCF-7 cells by a mechanism that includes increased ex…	Natural
-0.56252	0.694864	Imperatorin	a furanocoumarin that has been found in A. dahurica and has diverse biological activities, including anticancer, anti-inflammatory, and antioxidant properties. It decreases MCL-1 protein levels and increases mitochondrial membrane depolarization and apoptosis in doxorubicin-resistant HepG2 (R-HepG2) cells, an effect that can be reversed by overexpression of MCL-1.1 Imperatorin inhibits the growth…	LOPAC
-0.561197	0.780475	Ketotifen fumarate	A histamine H1 receptor antagonist and mast cell stabilizer	LOPAC
-0.561037	0.402893	Rifabutin	a broad-spectrum rifamycin antibiotic that has applications against tuberculosis, H. pylori, M. avium complex, Chlamydia, and other bacteria.	FDA
-0.560856	0.720171	Rottlerin	An inhibitor of PKCδ and other protein kinases	LOPAC
-0.559904	0.605484	BMS-193885	a potent, selective Y1 antagonist that is active in both acute and chronic animal models of food intake. Although it is active in vivo, it is not orally bioavailable due to poor intestinal absorption, so it is not being pursued for pharmaceutical development. BMS-193885 has been used as a pre-clinical proof of concept tool for showing efficacy of Y1 antagonism in treating obesity.	LOPAC
-0.55937	0.722752	Tetraethylammonium chloride	Blocks K+ channels; blocks nicotinic acetylcholine neurotransmission by blocking the receptor-mediated K+ currents. Tetraethylammonium chloride (TEAC) blocks K+ channels non-specifically. In rat aorta rings, tetraethylammonium inhibits relaxation induced by peroxynitrite. It blocks nicotinic acetylcholine neurotransmission by blocking the receptor-mediated K+ currents. TEAC can increase the contr…	LOPAC
-0.558927	0.492588	Phloretin	a natural phenol which inhibits a variety of transporters. It inhibits the monocarboxylate transporters MCT1 and MCT2 (IC50 = 28 and 14 µM, respectively), restricting the rapid transport of monocarboxylates like lactate and pyruvate across the plasma membrane. Phloretin also blocks the sodium/D-glucose cotransporter (Ki = 86 µM) and the human concentrative nucleoside transporter 3 (Ki = 32 µM).	Natural
-0.558084	0.628926	Dexmedetomidine·HCl	An α2-adrenoceptor agonist	FDA
-0.557265	0.70073	Fusidic acid sodium salt	a fusidane antibiotic originally isolated from F. coccineum. It is active against the Gram-positive bacteria S. aureus, S. pyogenes, C. diphtheriae, B. subtilis, and C. tetani (MIC50s = 0.01-20 µg/ml) but not the Gram-negative bacteria E. coli, S. typhimurium, and P. vulgaris or the fungi C. albicans and A. fumigatus (MIC50s = >100 µg/ml for all). Fusidic acid inhibits ribosomal recycling and pro…	LOPAC
-0.556837	0.748289	1-Deoxynojirimycin hydrochloride	An inhibitor of α-glucosidase I and II	LOPAC
-0.556425	0.685761	Cryptotanshinone	a natural quinoid diterpene first isolated from Salvia miltiorrhiza roots, which are used in traditional Chinese medicine for a variety of conditions. Cryptotanshinone, at 10-20 µM, stimulates AMP-activated protein kinase in C2C12 myotubes and activates p38 MAPK in DU145 cells. It inhibits the protein tyrosine phosphatase SHP2 in vitro (IC50 = 22.5 µM) and, at 4-8 µM, blocks phosphorylation of ST…	Natural
-0.555359	0.942117	Pheniramine maleate	A histamine H1 receptor antagonist	LOPAC
-0.554749	0.697058	Tyrphostin 1	a small molecule inhibitor of epidermal growth factor (EGF) receptor kinase function. This molecule associates with the substrate subsite of the protein tyrosine kinase (PTK) domain. Tyrphostin 1 is also known to block EGF-dependent receptor autophosphorylation. Furthermore, studies have reported that tyrphostin 1 can block Ca2+ channels and inhibit growth in vascular smooth muscle cells. EGFR ty…	LOPAC
-0.554196	0.745652	(R)-2-HG	an α-hydroxy acid that is over-produced in the human neurometabolic disease D-2-hydroxyglutaric aciduria (D-2-HGA).1 It is normally synthesized from 2-ketoglutarate (2-KG) by hydroxyacid-oxoacid transhydrogenase (HOT), although defects in HOT are not known to be associated with D-2-HGA. Instead, type I D-2-HGA involves mutations in D-2-hydroxyglutarate dehydrogenase, which converts D-2-HG back to…	Epigenetic
-0.554094	0.326977	Daidzin	an isoflavone that occurs naturally in some plants, including soy and kudzu root. Like other isoflavones, daidzin has anti-oxidant, anti-carcinogenic, and anti-atherosclerotic activities.1 Daidzin directly inhibits mitochondrial aldehyde dehydrogenase 2 (IC50 = 80 nM) and is an effective anti-dipsotropic isoflavone.	Natural
-0.554094	0.577498	(+)-Catechine	a polyphenolic flavonoid which has been isolated from a variety of natural sources including tea leaves, grape seeds, and the wood and bark of trees such as acacia and mahogany. Catechin is a more potent antioxidant than ascorbate or α-tocopherol in certain in vitro assays of lipid peroxidation. Catechin inhibits the free radical-induced oxidation of isolated LDL by AAPH. It has also been reporte…	Natural
-0.55398	0.679688	5,6-Dehydrokawain	PAF receptor binding inhibitor	Natural
-0.552651	0.800138	8-Cyclopentyl-1,3-dimethylxanthine	An adenosine A1 receptor antagonist	LOPAC
-0.551981	0.768964	Rutaecarpine	a quinazolinone alkaloid originally isolated from E. rutaecarpa that has diverse biological activities. It inhibits COX-1 and COX-2 in BMMC cells (IC50s = 8.7 and 0.28 µM, respectively) and is selective for COX-2 in HEK293 cells (IC50s = >400 and 2.8 µM, for COX-1 and COX-2, respectively). It slows the growth of cancer cells in vitro with GI50 values of 8.41-31.6 µM.1 It also has cardiovascular p…	LOPAC
-0.551759	0.729821	Demeclocycline hydrochloride	a tetracycline antibiotic derived from a strain of Streptomyces aureofaciens. DMC protects neurons from glutamate induced toxicity by suppressing calpain I and II activities.	LOPAC
-0.550668	0.735098	(+/-)-Anisodamine	Anisodamine is a muscarinic receptor antagonist. Anisodamine is a naturally occurring atropine derivative isolated from Scopolia Tangutica Maxim plant indigenous to Tibet. Anisodamine is a non‐specific cholinergic antagonist. It is considered less efficient and less toxic than atropine. Anisodamine interferes with liposome structure and affects cell membrane. It might act as an anti‐oxidant, in p…	LOPAC
-0.550385	0.653291	2-Chloroadenosine	an analog of adenosine. It is an adenosine A1 receptor agonist.[2] It might possess anti-oxidant property.	LOPAC
-0.549042	0.699544	Tulobuterol hydrochloride	a sympathomimetic amine, possessing bronchodilator activity.	LOPAC
-0.548901	0.635563	Cafestol acetate	a coffee-specific diterpene. It has anti-carcinogenic and anti-inflammatory activities. Cafestol stimulates apoptosis in cells associated with colorectal and renal cancer (Caki cells). It is used to study mechanisms of anti-oxidation related to hydrogen peroxide induced oxidative stress and DNA damage. Cafestol increases the level of glutathione (GSH), by stimulating γ-glutamylcysteine synthetase…	Natural
-0.547024	0.463612	(-)-Guaiol	a sesquiterpene alcohol which has guaiane skeleton. It naturally occurs in essential oils extracted from Salvia lanigera and Helitta ongifoliata and has antibacterial activity.	Natural
-0.546817	0.694545	Nestorone	a potent progesterone receptor agonist with no androgenic, estrogenic, or glucocorticoid-like activities. Nestorone has been used as a female contraceptive, and recent studies inidicate that it may be useful as a male contraceptive as well. It has also been shown to have neurogenic and neuroprotective activity.	LOPAC
-0.546141	0.454205	Cephaeline·HBr	an alkaloid originally isolated from C. ipecacuanha with diverse biological activities. It inhibits the cytochrome P450 (CYP) isoforms CYP2D6 and CYP3A4 in vitro (Kis = 54 and 355 μM, respectively). Cephaeline reduces Zika virus (ZIKV) NS1 protein expression in HEK293 cells (IC50 = 26.4 nM) and reduces viral titer in ZIKV-infected SNB-19 cells (IC50 = 3.11 nM). In vivo, cephaeline (2 mg/kg, i.p.)…	Natural
-0.545741	0.806447	Nimesulide	A cell-permeable sulfonanilide that is shown to exhibit an antiproliferative effect against three HER-2-positive breast cancer cell lines, SKBR-3, BT474 and MDA-MB-453 (IC50= 0.9, 2.2, and 4.0 µM, respectively), and affects two HER-2-negative breast cancer cell lines, MCF-7 and MDA-MB-231 only at much higher concentrations (IC50 = 22.1 and 19.6 µM, respectively). The compound is not expected to b…	LOPAC
-0.545504	0.665897	Enalapril Maleate	an angiotensin-converting enzyme inhibitor	FDA
-0.545287	0.376598	Cevadine	a primary reference substance with assigned absolute purity	Natural
-0.544812	0.84594	MK-912	Selective α2-adrenoceptor antagonist	LOPAC
-0.544336	0.633309	(±)- Chlorpheniramine maleate	can prevent rhinitis and urticaria. It is used to cure several allergic conditions. This antihistamine is used in small-animal veterinary practices.	LOPAC
-0.54366	0.782536	S-Methyl isothiourea hemisulfate	A potent non-selective inhibitor of NOS	LOPAC
-0.543572	0.606821	Bergenin	a glycoside and a major constituent of Peltophorum plants and has diverse biological activities. It scavenges 2,2-diphenyl-1-picrylhydrazyl (DPPH) and ABTS radicals and inhibits nitrite production in vitro when used at concentrations ranging from 0.1 to 3 mM. Bergenin induces production of TNF-α, nitric oxide (NO), and IL-12 in M. tuberculosis-infected macrophages. In vivo, bergenin reduces pulmo…	Natural
-0.54252	0.772597	3-alpha,21-Dihydroxy-5alpha-pregnan-20-one	A neurosteroid and positive allosteric modulator of GABAA receptors	LOPAC
-0.542302	0.799221	Dihydrocapsaicin	the primary active component of the heat and pain-eliciting lipid soluble fraction of the Capsicum pepper. Capsaicin is found in natural hot pepper extracts along with a number of impurities, including dihydrocapsaicin and several lesser impurities. Separation by HPLC is required in order to obtain pure dihydrocapsaicin. Dihydrocapsaicin represents about 10% of the compound present in commercial …	LOPAC
-0.541794	0.847428	Daphnetin	a coumarin derivative that has been isolated from plants of the genus Daphne and has diverse biological activities, including kinase inhibitory, anti-proliferative, and antioxidative properties. It inhibits the EGF receptor (EGFR), PKA, and PKC (IC50s = 7.67, 9.33, and 25.01 µM, respectively, in kinase assays) and inhibits cell proliferation (IC50 = 73 µM) and reduces cyclin D1 levels in MCF-7 br…	LOPAC
-0.541669	0.327493	Phytosphingosine	a long chain sphingoid base that occurs broadly in yeast, plants and animals including mammals. In yeast it is involved in mediating the heat stress response, perhaps through activation of the AGC-type protein kinases, Pkh1, Pkh2, Ypk1, Ypk2, and Sch9. It is proapoptotic in human cancer cell lines. PHS induces ΔΨm and release of cytochrome c from mitochondria either directly or through activation…	Natural
-0.539964	0.862711	BMS-189453	a potent RARβ agonist that acts as an antagonist against RARα and RARγ. BMS-189453 induces RARβ reporter gene expression at sub nanomolar levels, and is 30 fold more potent than all-trans retinoic acid for inducing TGFβ activity in normal breast cells. The compound BMS-189453 does not transactivate RARα or γ transcriptional activity, but binding to those family members induces a strong transrepre…	LOPAC
-0.539179	0.680381	GYKI 52466 hydrochloride	Selective allosteric AMPA receptor antagonist; anti­convulsant; skeletal muscle relaxant.	LOPAC
-0.538168	0.700162	Evodiamine	an indole alkaloid found in Evodia rutaescarpa. It acts as an anti-inflammatory compound; the mechanism of action may be inhibition of prostaglandin E2 synthesis or by cyclooxygenase 2 induction and NF-κB activation. Evodiamine has been studied for multiple cellular effects, including apoptotic activity, interference with metastasis and inhibition of angiogenesis.	Natural
-0.537732	0.340934	Mitoxantrone dihydrochloride	a cytostatic anthracenedione that intercalates in DNA and increases the incidence of double-strand breaks by stabilizing the cleavable complex of topoisomerase II and DNA. Mitoxantrone also displays broad immunosuppressive activity inhibiting proliferation of all classes of lymphocytes and inducing apoptosis of antigen-presenting T cells. It used clinically as a chemotherapeutic agent against leu…	LOPAC
-0.537724	0.496379	Myricetin	a flavonoid compound found in many fruits and vegetables, including red wine, that acts as a powerful antioxidant. Myricetin inhibits TBARS formation with an IC50 value of 6.34 and at 20 µM, blocks oxLDL uptake by U937-derived macrophages, reducing CD36 expression. Myricetin demonstrates potent chemopreventative potential by binding JAK1/STAT3 to inhibit the neoplastic transformation of murine JB…	Natural
-0.537483	0.576244	Azelaic Acid	a naturally occurring and saturated dicarboxylic acid with diverse biological activities. It is a competitive inhibitor of tyrosinase, NADH dehydrogenase, succinic dehydrogenase, and reduced ubiquitinone:cytochrome C oxidoreductase in vitro. Azelaic acid inhibits the growth and colony formation of B16 murine as well as HMB2 and SK32 human melanoma cells in a concentration-dependent manner but has…	FDA
-0.537349	0.654166	(±)-7-Hydroxy-DPAT hydrobromide	Selective D3 dopamine receptor agonist; active enantiomer of (±)-7-hydroxy-DPAT.	LOPAC
-0.537332	0.33558	Ursolic acid	a pentacyclic triterpenoid that has been isolated from M. pumila and has diverse biological activities, including anticancer, hepatoprotective, anti-inflammatory, antioxidant, antimicrobial, and cardioprotective properties. It inhibits the proliferation of HepG2 liver, MCF-7 breast, and Caco-2 colon cancer cells (EC50s = 87.4, 14.4, and 34.4 μM, respectively). Ursolic acid reverses increases in h…	Natural
-0.536967	0.499671	(-)-Cotinine	Major metabolite of nicotine in humans.	Natural
-0.536963	0.7463	Tizanidine hydrochloride	An α2-adrenergic receptor agonist	LOPAC
-0.536	0.744002	DCEBIO	An activator of IKCa1/KCa3.1 channels	LOPAC
-0.53558	0.326819	Nigericin·Na	an antibiotic derived from S. hygroscopicus that acts as a potassium ionophore promoting K+/H+ exchange across mitochondrial membranes. Nigericin can be used as a research tool to disrupt intracellular H+ and K+ concentration, thus altering pH, membrane potential, and cell volume. At 10 μM, nigericin induces egress of T. gondii parasites by inducing efflux of K+.	Natural
-0.534744	0.368664	Kanamycin sulfate	The product acts by binding to the 70S ribosomal subunit, inhibiting translocation and eliciting miscoding.	Natural
-0.533234	0.305785	Temsirolimus	a specific inhibitor of mammalian target of rapamycin (mTOR) mTOR Complex 1 (mTORC1). Temsirolimus is an antiproliferative and antiangiogenic, the first-in-class mTOR inhibitor approved for the treatment of patients with advanced poor prognosis renal cell carcinoma. The inhibitory action of temsirolimus is mediated by FKBP-12 (FK506-binding protein 12), a major intracellular protein. It is useful…	FDA
-0.532018	0.361875	Givinostat (ITF2357)	a hydroxamate HDAC inhibitor that inhibits class I and class II enzymes. Givinostat posseses a very promising activity profile in multiple myeloma and acute myelogenous leukemia in vitro and in vivo. Givinostat also has anti-inflammatory activity and inhibits the secretion of the tumor necrosis factor-alpha (TNF-α), IL-1, and IL-6. Givinostat has been in multiple Phase 2 studies for both inflamma…	Epigenetic
-0.531846	0.740633	8-(4-Chlorophenylthio)-cAMP sodium	Membrane permeable cAMP analog. Used as a selective activator of cAMP dependent protein kinase (PKA). Inhibits cGMP-dependent phosphodiesterase and, at higher concentrations, inhibits cAMP-dependent phosphodiesterase. Inhibits phosphoinositide hydrolysis and secretion stimulated by n-formyl-Met-Leu-Phe but not platelet-activating factor in leukocytes. Renders HL-60 cells more resistant to NO-indu…	LOPAC
-0.530504	0.728962	L-Glutamine	an essential amino acid that is a crucial component of culture media that serves as a major energy source for cells in culture. L-Glutamine is very stable as a dry powder and as a frozen solution. In liquid media or stock solutions, however, L-glutamine degrades relatively rapidly. Optimal cell performance usually requires supplementation of the media with L-glutamine prior to use.	LOPAC
-0.529832	0.646398	17alpha-hydroxy progesterone	Metabolite of progesterone.	LOPAC
-0.529381	0.44146	Raltegravir potassium	An HIV-1 integrase inhibitor	FDA
-0.527818	0.392583	Cerulenin	An anti-fungal antibiotic that inhibits fatty acid biosynthesis by binding, in equimolar ratio, to β-keto-acyl-ACP synthase. Also inhibits sterol synthesis by blocking the activity of HMG-CoA synthetase activity. Systemic and intracerebroventricular of this compound reduces feeding and induces weight loss.	Natural
-0.524768	0.371968	All trans retinoic acid	Potent modulator of growth and differentiation. Exerts its effects by binding to nuclear retinoic acid receptors (RARs) which directly regulate gene expression. Inhibits melanocyte adhesion, motility, and growth. Has keratolytic activity. Induces differentiation of tumor cells of neural origin. Induces apoptosis in acute promyelocytic carcinoma cells. PROTECT FROM AIR.	Natural
-0.52442	0.497592	Artemether	a methyl ether derivative of artemisinin. It is used against multi-drug resistant strains of the malaria parasite, Plasmodium falciparum, and shows potential in treatment of schistosomiasis.	FDA
-0.52374	0.719268	Diethylenetriamine pentaacetic acid	a diethylenetriaminepentaacetic anhydride, which is a bifunctional chelating agent. It is used for the treatment of poisoning.	LOPAC
-0.523213	0.597915	Auraptene	an estrogen receptor modulator that also acts as an ACAT inhibitor. It displays anti-tumor effects in several xenograft and chemically-induced murine tumor models. Auraptene induces apoptosis and is anti-proliferative in cancer cell lines. It has agonistic properties against PPARs, and interferes with lipid and cholesterol production by inhibiting ACAT (IC50 = 4 uM). Auraptene (7-geranyloxycoumar…	Natural
-0.52269	0.67134	(+)-Chlorpheniramine maleate salt	H1 Histamine receptor antagonist.	LOPAC
-0.522424	0.475207	Repaglinide	An ATP-dependent potassium channel blocker	FDA
-0.522291	0.686454	Xylazine hydrochloride	a centrally acting drug, which exhibits muscle relaxant and analgesic properties. α2-Adrenergic receptor agonist, sedative, muscle relaxant.	LOPAC
-0.521509	0.678275	Dexamethasone	A synthetic glucocorticoid	FDA
-0.520424	0.298458	N-Formyl-Deacetylcolchicine	inhibits microtubule polymerization by binding to its constitutive protein, tubulin. as availability of tubulin is essential to mitosis, colchicine may inhibit mitosis. inhibits activation and migration of neutrophils to sites of inflammation.	Natural
-0.520424	0.634933	(+)-Cinchonine	cinchona bark alkaloid, which was used to treat malaria. Cinchonine is more efficient than quinine in increasing the intracellular accumulation and restoring the cytotoxicity of doxorubicin, mitoxantrone and vincristine on well-characterized multidrug resistance (MDR) cell lines. In the phase I of clinical trial was investigated the properties of cinchonine combined with the CHVP (cyclophosphamid…	Natural
-0.52007	0.406336	Sulfacetamide·Na	a sulfonamide antibiotic that is bacteriostatic against Gram-positive and Gram-negative bacteria. It inhibits dihydropteroate synthase (IC50 = 9.6 µM), blocking the synthesis of dihydrofolic acid, and also inhibits bacterial 4-aminobenzoic acid, which is required for the synthesis of folic acid.	FDA
-0.51718	0.469677	Rauwolscine	A reversible α2-adrenergic receptor antagonist	Natural
-0.516021	0.720704	Spironolactone	an analytical reference standard categorized as a steroid. It is a diuretic that has been abused as a performance-enhancing drug and masking agent in sports doping.	LOPAC
-0.516004	0.570605	Methotrexate	acts by inhibiting the metabolism of folic acid and blocking key enzymes in the synthesis of purines and pyrimidines required for cell proliferation. MTX is known to induce adenosine release, which mediates many of its anti-inflammatory effects, including the reduction of proinflammatory cytokines. Formulations containing MTX have been used in the treatment of cancer, autoimmune diseases, ectopic…	FDA
-0.515974	0.795996	Carvedilol	A non-selective β-adrenergic receptor antagonist	LOPAC
-0.515726	0.661876	Catharanthine	a precursor of the vinblastine and vincristine group of alkaloids found in the Vinca plant, C. roseus that have been used widely in chemotherapy regimens. It is biologically active in synergy with similar indole alkaloids and can be used as starting material for the synthesis of vinblastine and vincristine.	Natural
-0.515657	0.748949	3,4-Dichloroisocoumarin	Serine protease inhibitor. Active towards a wide range of serine proteases including granzymes. Not active toward β-lactamases.	LOPAC
-0.51534	0.338275	Wedelolactone	A natural NF-κB inhibitor	Natural
-0.514674	0.767417	Dantrolene sodium	An inhibitor of calcium release	LOPAC
-0.514468	0.356749	Sulconazole Nitrate	an azole antifungal that is active against dermatophyte fungal species, including isolates of various Candida species. It acts as a non-specific inhibitor of styrene metabolism by cytochrome P450 (CYP450) enzymes, with Ki values ranging from 0.008 to 3.5 µM against various CYP450 isoforms in human lymphoblast microsomes in vitro. In rat spleen microsomes, it inhibits the activity of heme oxygenas…	FDA
-0.514086	0.693489	Guvacine hydrochloride	An inhibitor of GABA uptake	LOPAC
-0.512917	0.37788	Nitrarine·2HCl	a hypotensive, spasmolytic, coronary dilating and sedative action. Its antiarrhythmic properties are due to its stabilizating effects on the membrane and its coronary dilating action.	Natural
-0.512695	0.673918	DMH4	a potent VEGF inhibitor and an angiogenesis inhbitor. It is a selective VEGF inhibitor with an IC50 of 161 nM for VEGFR inhibition compared to 8000 nM for AMPK. Unlike the structurally similar DMH1, which is a selective BMP inhibitor, DMH4 shows little affinitiy for BMP with an IC50 of 3500 nM for BMPR-I.	LOPAC
-0.510721	0.663087	Flunarizine dihydrochloride	Blocks T-type Ca2+/Na+ channels; inhibits K+-induced catecholamine release from chromaffin cells	LOPAC
-0.510415	0.426596	Delcorine	Antiarrhythmic and hypotensive; ganglion blocker; exhibits weak affinity at brain α-bungarotoxin-sensitive nicotinic acetylcholine receptors.	Natural
-0.509292	0.74697	Iloperidone	an atypical antipsychotic and adrenergic, dopamine, and serotonin (5-HT) receptor antagonist. It binds to several receptors, including the α1-adrenergic receptor (α1-AR), α2-AR, and dopamine D2 receptor (Kis = 0.31, 3, and 3.3 nM, respectively), as well as the 5-HT1A, 5-HT1D, 5-HT2A, and 5-HT2C receptors (Kis = 33, 15, 0.2, and 14 nM, respectively) in radioligand binding assays using human post-m…	LOPAC
-0.507457	0.829255	Zoledronic acid monohydrate	a third-generation heterocyclic nitrogen-containing bisphosphonate that inhibits the prenylation of GTPases critical to the signaling events related to osteoclast-mediated bone resorption. It has a high affinity for hydroxyapatite (Ki = 3.47 μM) and binds directly to mineralized bone where it decreases bone resorption by inhibiting osteoclast proliferation and inducing osteoclast apoptosis. At μM…	LOPAC
-0.506112	0.75584	Nitisinone	An HPPD inhibitor	LOPAC
-0.505045	0.450296	Baccatin III	a polycyclic diterpene originally isolated from the yew tree (Taxus) that is a precursor of paclitaxel. Baccatin III induces apoptosis in JR4-Jurkat leukemia, HepG2 liver hepatocellular carcinoma, HeLa cervical, OVCAR-3 ovarian carcinoma, and T47D breast cancer cell lines (IC50s = 3.5, 3, 4, 5, and 2 μM, respectively). It dose-dependently increases the antigen presenting cell (APC) capacity of bo…	Natural
-0.50414	0.782257	7-Cyclopentyl-5-(4-phenoxy)phenyl-7H-pyrrolo[2,3-d]pyrimidin-4-ylamine	A potent and selective pyrrolo[2,3-d]pyrimidine Lck inhibitor.	LOPAC
-0.50379	0.276215	Cytochalasin D	An inhibitor of actin polymerization	Natural
-0.503402	0.649554	L-Hyoscyamine	A muscarinic receptor antagonist	LOPAC
-0.502424	0.689389	Fiduxosin hydrochloride	α1-Adrenoceptor antagonist.	LOPAC
-0.501026	0.689704	Tolazamide	A sulfonylurea inhibitor of SUR1/KIR6.2	FDA
-0.500422	0.44108	Luteolin	a polyphenolic flavone found in many plants including soybeans and perilla leaves. Luteolin is one of the most potent flavanoid inhibitors of soybean and reticulocyte 15-lipoxygenases, with an IC50 of 0.6 µM. Luteolin has also been found to inhibit the release of TNFα from neutrophils, and to inhibit matrix metalloproteinases.	Natural
-0.499561	0.495957	Kahweol Acetate	an inducer of glutathione S-transferase (GST)	Natural
-0.499429	0.608261	Miglitol	an alpha-glucosidase inhibitor used as a glucose-lowering drug in diabetes research.	FDA
-0.499002	0.817212	(-)-Quinpirole hydrochloride	The putative D2 dopamine receptor agonist quinpirole (LY 171,555) is the most widely used D2 agonist in in vivo and in vitro studies Active enantiomer of (±)-quinpirole. Quinpirole is a dopamine agonist with high affinity for the D2 and D3 dopamine receptor subtypes. Specific [3H]quinpirole binding in rat brain was saturable, and dependent on temperature, membrane concentration, sodium concentrat…	LOPAC
-0.4986	0.659825	Nizatidine	A histamine H2 receptor antagonist	FDA
-0.498276	0.611653	Methyclothiazide	a thiazide diuretic. It inhibits norepinephrine- and vasopressin-induced contractions of aortic rings isolated from spontaneously hypertensive rats at a concentration of 100 μM. Methylclothiazide reduces salt-induced increases in blood pressure in salt-sensitive but not salt-resistant rats without affecting body weight or heart rate. Formulations containing methylclothiazide have been used to tre…	FDA
-0.497819	0.610749	Clemastine fumarate salt	an antihistamine H1-antagonist and anticholinergic that also has antipruritic activity.	LOPAC
-0.497802	0.74763	MKC-733	a 5-HT3 specific agonist.	LOPAC
-0.497465	0.358696	SBI-7406		Epigenetic
-0.497333	0.583676	Cinnarizine	Ca2+ channel blocker; central and peripheral vasodilator. Cinnarizine is a piperazine and a specific anti-vertigo agent. It is used to treat and prevent vertigo and motion sickness. In addition, cinnarizine is also used as an anti-histamine agent. Chronic use of this drug leads to side effects such as extrapyramidal reactions (Parkinson, tremor and akathisia) and depression.	LOPAC
-0.496349	0.60385	Nafcillin·Na	inhibits bacterial cell wall formation by inhibiting PBPs. The irreversible inhibition of the PBPs prevents the final crosslinking (transpeptidation) of the nascent peptidoglycan layer, which disrupts cell wall synthesis.	FDA
-0.495656	0.226343	L-Cycloserine	Blocks sphingosine biosynthesis by inhibition of ketosphinganine synthetase. Cytotoxicity toward neuroblastoma and medulloblastoma cells mediated by suppression of ganglioside synthesis. L-cycloserine is a potent inhibitor of serine palmitoyltransferase, the first step of sphingolipid synthesis.	Natural
-0.495438	0.576585	Cefsulodin sodium salt hydrate	a cephalosporin. Cephalosporins disrupt cell wall synthesis by inhibiting PBP crosslinking of peptidoglycan.	LOPAC
-0.494154	0.409847	Baicalein	A cell-permeable flavone that inhibits the activity of 12-lipoxygenase (IC50 = 120 nM) and reverse transcriptase. Protects cortical neurons from β-amyloid induced toxicity. Reduces leukotriene biosynthesis and inhibits the release of lysosomal enzymes. Also inhibits cellular Ca2+ uptake and mobilization, and adjuvant-induced arthritis. Reported to inhibit microsomal lipid peroxidation by forming …	Natural
-0.4929	0.688769	Pifithrin-	a reversible inhibitor of p53-mediated apoptosis and p53-dependent gene transcription such as cyclin G, p21/waf1, and mdm2 expression. Pifithrin-α enhances cell survival after genotoxic stress such as UV irradiation and treatment with cytotoxic compounds including doxorubicin, etopoxide, paclitaxel, and cytosine-β-D-arabinofuranoside. Pifithrin-α protects mice from lethal whole body γ-irradiation…	LOPAC
-0.4914	0.718837	(+)-CP-99994 dihydrochloride	an effective and selective non-peptide substance P receptor antagonist. It is synthesized from allylic and homoallylic C-H diamination of 4-phenyl-1-butene.[1] (+)-CP-99994 exhibits anti-emetic activity in ferrets. (+)-CP-99994 is a selective neurokinin (NK)-1 tachykinin antagonist. (+)-CP-99994 binds selectively and with high affinity with a Ki of 0.25 nM in a human cell line.	LOPAC
-0.491362	0.57646	16-Oxocafestol	a synthetic derivative of cafestol (sc-204663)	Natural
-0.490483	0.64897	Mupirocin	Antibiotic; inhibits isoleucyl-tRNA synthetase (IRS).	FDA
-0.48999	0.588585	Perphenazine	a phenothiazine that binds with high affinity to a wide variety of receptors, including dopamine, serotonin (5-HT), histamine, and α-adrenergic receptors (Kis = 1.4, 5.6, 8, 10, and 17 nM for D2, 5-HT2A, H1, α1A, and 5-HT6, respectively). It is described as a typical antipsychotic and has been used extensively for schizophrenia and schizophrenia-like psychoses.	FDA
-0.48976	0.396006	Sertraline·HCl	a tetraline that inhibits monoamine transporters with selectivity for the serotonin transporter (IC50s = 70, 520, and 720 nM for the serotonin, dopamine, and norepinephrine transporters, respectively). It is classified as a selective serotonin reuptake inhibitor. Formulations containing sertraline are applicable to depression and related disorders.	FDA
-0.488799	0.715804	Amygdalin	a cyanogenic glycoside that has been found in seeds from plants of the Rosaceae family and has diverse biological activities. It induces cell cycle arrest at the G0/G1 phase, decreases cyclin A and Cdk2 levels, and inhibits cell growth in UMUC-3, RT112, and TCCSUP bladder cancer cells when used at concentrations ranging from 1.25 to 10 mg/ml. Amygdalin (3 mg/kg) reduces the number of primary micr…	Natural
-0.488349	0.774571	Diltiazem·HCl	an analytical reference standard that is functionally categorized as a calcium channel blocker. It causes vasorelaxation and lowers blood pressure. Diltiazem is found as an adulterant in cocaine specimens.	FDA
-0.488256	0.309463	Aristolochic acid A	Potent phospholipase A2 inhibitor, including calcium ionophore-induced phospholipase A2 activity in neutrophils. Kidney tumor initiator in experimental animal model.	Natural
-0.485633	0.605981	Dyphylline	An adenosine receptor antagonist and phosphodiesterase inhibitor	FDA
-0.485579	0.786429	Mianserin hydrochloride	Antidepressant; antagonist/inverse agonist at 5-HT2 serotonin receptors; also blocks the H1 histamine receptor and the α2 adrenoceptor.	LOPAC
-0.484188	0.671584	(±)-gamma-Vinyl GABA	A selective, irreversible inhibitor of GABA transaminase with antiepileptic properties. Covalently binds to the active site of GABA tansaminase to inactivate it in a dose-dependent manner and increases extracellular GABA levels in the brain. Rapidly absorbed following oral administration and is shown to inhibit [3H]GABA uptake across the apical membrane of Caco-2 cell monolayers in a concentratio…	LOPAC
-0.483549	0.319928	2,4-Pyridinedicarboxylic Acid	an in vitro and in cell inhibitor, as well as a known inhibitor of the histone lysine demethylases. 2,4-Pyridinedicarboxylic acid has been used in a study to determine that ruthenium(II) complexes exert antimetastatic effects on several tumor cell lines in vitro, achieved mostly by the effect on cell adhesion, migration and angiogenesis. 2,4-Pyridinedicarboxylic acid has been used in a study to d…	Epigenetic
-0.482657	0.506912	Naringenin	a polyphenolic material, is used to prepare nickel(II) naringenin-oxime complex, which can be used as a catalyst for Mizoroki−Heck cross-coupling reaction. It has been used as a hypochlorite scavenger to prevent the formation of chloramines from oxidation of hypochlorite in the human serum albumin. It induces apoptosis in human pancreatic cancer SNU-213 cells. It also shows cytotoxic effects on v…	Natural
-0.482613	0.749279	Daidzein	Inactive analog of genistein. Blocks the G1 phase of the cell cycle in Swiss 3T3 cells by inhibiting casein kinase II activity. Inhibits epidermal growth factor (EGF) receptor autophosphorylation (IC50 >300 µM). Inhibits the growth of MiaPaC-2 and PANC-1 cells (IC50= 45 µM and 75 µM, respectively).	LOPAC
-0.48004	0.787746	1,3-Dimethyl-8-phenylxanthine	Selective A1 adenosine receptor antagonist.	LOPAC
-0.479955	0.664711	SB 269970 hydrochloride	A selective 5-HT7 receptor antagonist. Extremely potent in vivo and in vitro. Chronic or acute (even single dose) administration of SB269970 induces functional desensitization of the 5-HT7 receptor system, which precedes changes in the receptor density. This mechanism may be responsible for the rapid antidepressant-like effect of the 5-HT7 antagonist in animal models. SB-269970 is an analogue of …	LOPAC
-0.478221	0.741539	BAY 61-3606 hydrochloride hydrate	helps to prevent the degranulation of freshly isolated basophils. It also prevents B cell receptor (BCR)-mediated signaling. Spleen tyrosine kinase (Syk) inhibitor; anti-inflammatory. Syk plays a major role in inflammation pathways via receptors for the Fc portion of immunoglobulins, as well as B cell signaling. It is orally active, potent (Ki 7.5 nM), and highly selective for Syk vs other kinase…	LOPAC
-0.478055	0.459063	Xanthotoxin	8-methoxypsoralen (8-MOP) plus ultraviolet A (UVA) irradiation induces monoadducts and interstrand cross-links in DNA and therefore can be used to study DNA repair and recombination mechanisms. Cultured normal human melanocytes treated with 8-methoxypsoralen and irradiated with ultraviolet A (UVA) formed 8-methoxypsoralen-phospholipid photoadducts that could be substituted for diacylglycerol to a…	Natural
-0.478015	0.368598	Troleandomycin	a macrolide antibiotic and an inhibitor of CYP	Natural
-0.477631	0.802618	Atovaquone	an anti-protozoal mitochondrial electron transport inhibitor; Antimalarial; Antipneumocystic, and has also been used to treat toxoplasmosis. It is an analog of protozoan mitochondrial protein ubiquinone, and acts by inhibiting the cytochrome bc(1) complex via interactions with the Rieske iron-sulfur protein and cytochrome b in the ubiquinol oxidation pocket.	FDA
-0.476508	0.596029	ABT-418 hydrochloride	Neuronal nicotinic acetylcholine receptor agonist with cognition enhancing and anxiolytic activities.	LOPAC
-0.476484	0.522071	Budesonide	A glucocorticoid and an agonist of glucocorticoid receptors	FDA
-0.474611	0.767898	Ranitidine hydrochloride	A histamine H2 receptor antagonist	LOPAC
-0.474132	0.230179	Cytochalasin B	An inhibitor of actin polymerization	Natural
-0.473968	0.472021	Sterigmatocystin	a mycotoxin produced by species of Aspergillus and other fungi. It can have developmental, teratogenic, and carcinogenic effects in animals	Natural
-0.4732	0.708706	ANA-12	A TrkB receptor antagonist	LOPAC
-0.472951	0.412537	Ceftriaxone sodium salt	a third-generation, broad-spectrum cephalosporin antibiotic that disrupts the synthesis of the peptidoglycan layer of bacterial cell walls. It has been shown to increase excitatory amino acid transporter-2 pump expression in the central nervous system and to reduce glutamatergic toxicity in both in vitro and in vivo models.	LOPAC
-0.472788	0.985529	KRN633	a cell-permeable; reversible and ATP-competitive inhibitor of vascular endothelial growth factor receptor tyrosine kinase (VEGFR) with IC50 values of 170, 160, and 125 nM for VEGFR-1, -2, -3, respectively. Krn633 inhibits PDGFR-α and c-Kit only at higher concentrations (IC50 = 0.97 and 4.33 μM, respectively) and is inactive towards a panel of 17 other kinases (IC50 >/= 10 μM).	LOPAC
-0.471698	0.800483	SCH-50911	a selective, competitive, orally active GABAB receptor antagonist.	LOPAC
-0.470437	0.694381	Arbutin	a glycosylated hydroquinone used in traditional Chinese medicine (TCM). Arbutin inhibits melanin formation due to its tyrosinase inhibitory activity.	Natural
-0.469022	0.655274	Lorcainide hydrochloride	a Class 1c antiarrhythmic agent that blocks open fast acting voltage-gated sodium channels (subtype Nav1.5). Data shows that Lorcainide is a potent, selective antagonists/inverse agonists of human and rat H3 histamine receptors.	LOPAC
-0.468931	0.629294	Palonosetron·HCl	A 5-HT3 receptor antagonist	FDA
-0.468786	0.659263	Ipratropium bromide	A muscarinic receptor antagonist	LOPAC
-0.468434	0.858176	Myricetin	a flavonoid compound found in many fruits and vegetables, including red wine, that acts as a powerful antioxidant. Myricetin inhibits TBARS formation with an IC50 value of 6.34 and at 20 µM, blocks oxLDL uptake by U937-derived macrophages, reducing CD36 expression. Myricetin demonstrates potent chemopreventative potential by binding JAK1/STAT3 to inhibit the neoplastic transformation of murine JB…	LOPAC
-0.468342	0.397698	Citrinin	A mycotoxin that disrupts microtubule organization	Natural
-0.468281	0.658152	5HPP-33	a thalidomide derivative with cell-proliferation inhibitory properties	LOPAC
-0.467105	0.393965	Plumbagin	a natural 1,4-naphthoquinone first isolated from plants of the genus Plumbago. It has diverse effects in cells and animals. Plumbagin causes the generation of reactive oxygen species and induces apoptosis in cancer cells. It activates signaling through Nrf2 and the antioxidant response element, inducing the expression of Nrf2 target genes, including NQO1 and heme oxygenase-1 in cultured neuronal …	Natural
-0.467105	0.629688	Podocarpic acid	potent, semi-synthetic LXR agonist derived from extracts of the mayapple. APD acting through LXR in concert with the retinoid X receptor (RXR), its heterodimerization partner, induces the expression of the ABCA1 reverse cholesterol transporter. This acts to increase the efflux of cholesterol from enterocytes and thus inhibits the overall absorption of cholesterol (ED50 value of 1 nM). In transien…	Natural
-0.46359	0.7479	K145 hydrochloride	It has the ability to prevent leukemia cell growth in vitro. K145 (3-(2-amino-ethyl)-5-[3-(4-butoxyl-phenyl)-propylidene]-thiazolidine-2,4-dione) is a selective inhibitor of sphingosine kinase-2 (SphK2) and an anticancer agent. K145 selectively inhibited SphK2 in a dose-dependent manner with an IC50 of 4.30 +/- 0.06 μM with no inhibition of SphK1 at concentrations up to 10 μM. K145 significantly …	LOPAC
-0.462191	0.387076	Cephalexin hydrate	disrupts the synthesis of the peptidoglycan layer of bacterial cell walls which is responsible for cell wall structural integrity. Peptidoglycan synthesis is facilitated by transpeptidases known as penicillin-binding proteins (PBPs). PBPs bind to the D-Ala-D-Ala at the end of muropeptides (peptidoglycan precursors) to crosslink the peptidoglycan. Cephalexin antibiotics mimic the D-Ala-D-Ala site,…	LOPAC
-0.460883	0.439105	Norfluorocurarine	a CNS stimulant, a convulsant and probably a Glycinergic antagonist.	Natural
-0.460119	0.748998	SIB 1893	SIB 1893 non-competitively inhibits glutamate-induced increase in Ca2+ at human metabotropic glutamate receptor 1 (hmGluR1). It also acts as a positive allosteric modulator of hmGluR4. Selective and noncompetitive mGlu5 metabotropic glutamate receptor antagonist.	LOPAC
-0.459946	0.458221	Shikonin	A naphthoquinone found in the Chinese herb Lithospermum erythrorhizon. Possesses significant antibacterial, anti-inflammatory and antitumor activities. Inhibits TNF-α and B-16 melanoma-induced angiogenesis in mice. Blocks the expression of integrin αVβ3 and inhibits endothelial cells proliferation and migration in vitro. Also induces apoptosis in HL60 human promyelocytic leukemia cell line. Selec…	Natural
-0.459898	0.801519	Cirazoline hydrochloride	Selective α1-adrenoceptor agonist; non-selective imidazoline binding site ligand	LOPAC
-0.45988	0.464286	Rifampicin	Antibiotic that specifically inhibits DNA-dependent RNA polymerase in bacteria by forming an inactive complex. Does not affect mammalian RNA polymerase. Inhibits transcription by preventing the initial transcription complex from entering the elongation mode.	Natural
-0.459333	0.81012	NNC 55-0396	a T-type calcium channel antagonists. It is the structural analog of mibefradil.[1] NNC-55-0396 has the ability to block cell proliferation and stimulate cell apoptosis in leukemia cell lines. Selective T-type calcium channel inhibitor	LOPAC
-0.457875	0.531525	(+)-Tubocurarine chloride	A potent competitive antagonist of nAChR (IC50= 41 nM). Used as nondepolarizing muscle relaxants during electroshock treatments, in convulsive states, and as anesthesia adjuvant.	Natural
-0.457765	0.70072	Glyburide	A sulfonylurea that selectively blocks ATP-sensitive K+ channels. Reduced K+ conductance causes membrane depolarization and influx of Ca2+ through voltage sensitive Ca2+ channels. Blocks vascular smooth muscle relaxation produced by KATP channel openers. Inhibits the vasorelaxing effects of nitric oxide. Antidiabetic sulfonylurea that selectively blocks ATP-sensitive K+ channels. Reduced K+ condu…	FDA
-0.455677	0.794139	Methapyrilene hydrochloride	H1 histamine receptor antagonist. Potent liver carcinogen in rats.	LOPAC
-0.455615	0.664053	N-Methyl-beta-carboline-3-carboxamide	Benzodiazepine inverse receptor agonist; potent anxiogenic agent.	LOPAC
-0.453199	0.562072	1,10-Phenanthroline monohydrate	a metal chelator and inhibitor of metalloproteases. It inhibits zinc-dependent hydrolysis of Fa-Gly-Leu-NH2 by B. subtilis neutral protease and B. thermoproteolyticus thermolysin. 1,10-Phenanthrine is fungistatic against P. verrucosa (MIC = 0.8 μg/ml) and inhibits zinc-induced P. verrucosa metallo-type peptidase activity in a concentration-dependent manner. It induces uncoupling of and inhibits e…	LOPAC
-0.452828	0.708041	TPMPA	A selective GABAA-ρ1 (ρ1 GABAC) receptor antagonist	LOPAC
-0.45256	0.762276	Piperacillin	a broad-spectrum β-lactam antibiotic of the penicillin class. It is active against Gram-negative and Gram-positive bacteria, including Enterococcus species, E. coli, and P. mirabilis (MIC50s = 0.5-2 µg/ml) as well as gentamicin-susceptible and -resistant strains of P. aeruginosa (MIC50s = 8 and 125 µg/ml, respectively).2 In a mouse model of systemic infection, piperacillin is active against P. ae…	FDA
-0.451859	0.781687	Nisoxetine hydrochloride	A NET inhibitor	LOPAC
-0.450341	0.303708	Daunorubicin	DNA topoisomerase II inhibitor	Natural
-0.450288	0.772261	NBQX disodium	Potent AMPA antagonist	LOPAC
-0.450168	0.724404	Spironolactone	an analytical reference standard categorized as a steroid. It is a diuretic that has been abused as a performance-enhancing drug and masking agent in sports doping.	FDA
-0.449903	0.803671	Mibefradil dihydrochloride	selectively blocks Ca2+ entry into cells by inhibiting T-type Ca2+ channels	LOPAC
-0.449894	0.618018	Dexchlorpheniramine Maleate	A histamine H1 receptor antagonist	FDA
-0.448628	0.699057	Carbamazepine	Inhibitor of neuronal NaV channels; anticonvulsant	LOPAC
-0.446103	0.761232	SU 5416	VEGFR inhibitor. Also inhibits KIT, RET, MET and FLT3	LOPAC
-0.446024	0.616537	Naringin	a flavanoid in grapefruit and other citrus fruits, potently inhibits intestinal organic anion-transporting polypeptide 1A2 (OATP1A2). Grapefruit juice thereby reduces bioavailability of many pharmacological agents taken at the same time.	Natural
-0.445017	0.674563	Cystamine dihydrochloride	a useful reagent to derivatize various polymer monoliths for hydrophilic interaction liquid chromatography; as a crosslinking agent in the development of polymer hydrogels; and as a functional group in nanoparticles developed for siRNA and DNA delivery.	LOPAC
-0.444884	0.665986	Nefazodone·HCl	A potent 5-HT2A receptor antagonist (Kd = 26 nM), with moderate affinity for the alpha1-adrenergic receptor (Kd = 48 nM) and 5-HT1A receptor (Kd = 80 nM). Originally developed as a clinical antidepressant but discontinued in 2004, nefazodone (Serzone) still remains a specific inhibitor of certain serotonergic pathways. Nefazodone also has been reported to induce mitochondrial dysfuntion.	FDA
-0.444707	0.526485	Articaine·HCl	Articaine hydrochloride helps to alleviate pain and blocks transmission of the pain signal. Articaine is an amide local anesthetic widely used in dentistry. Articaine acts by inhibition of nerve impulse conduction by blockade of sodium channels.	FDA
-0.444581	0.612489	Methysticin	potent NF-κB inhibitory activity and minimum toxicity. It is shown to inhibit NF-κB (IC50 = 0.19 µg/ml) 100 times more potently than traditional kava in A549 cells in an in vitro luciferase-based assay. It is also reported to suppress the elevation of IKKα, p65, and COX-2 and the degradation of IκBα in A549 cultures stimulated with TNF-alpha; through Western Blot analysis.	Natural
-0.443641	0.880879	S-(4-Nitrobenzyl)-6 thioinosine	Inhibitor of equilibrative nucleoside transporters (ENTs), particularly adenosine transporters, in central nervous system and vascular smooth muscle. Potent adenosine uptake inhibitor	LOPAC
-0.442221	0.676819	Cinepazide maleate	a vasodilator used in China for the treatment of cardiovascular and cerebrovascular diseases, and peripheral vascular diseases. As a calcium channel blocker, cinepazide can stop calcium from entering vascular smooth muscle cells and relax smooth muscles of cerebral vessels, coronary arteries and peripheral vessels so as to relieve vasospasm, reduce vascular resistance, improve flexibility of red …	LOPAC
-0.442013	0.811722	Metolazone	a "water pill" (diuretic) that increases the amount of urine you make, which causes your body to get rid of excess water. This drug is used to treat high blood pressure.	LOPAC
-0.441356	0.424242	Ritonavir	sold under the trade name Norvir, is an antiretroviral medication used along with other medications to treat HIV/AIDS.	FDA
-0.440385	0.490234	Securinine	a major plant-derived alkaloid and also a GABAA receptor antagonist. (-)-Securinine is significantly potent on HeLa cells growth inhibition with IC50 values of 7.02±0.52 μg/mL (32.3 μM).	Natural
-0.440238	0.688708	IMS2186	an anti-proliferative and anti-angiogenic agent. Apparently IMS2186 blocks the cell cycle at G2 and inhibits the production of PGE2/TNF-α. IMS2186 inhibits cell growth in vitro in tumor cells, non-transformed fibroblasts, and retinal pigment epithelial cells. IMS2186 inhibits angiogenesis (IC50 = 0.1 μM) and cell migration. Intraocular injection of IMS2186 could be a long-lasting effective treatm…	LOPAC
-0.439603	0.789675	Rizatriptan benzoate salt	a serotonin 5HT-1B/1D-receptor agonist used to treat migraine.	LOPAC
-0.439156	0.759172	Retro-2	has been used to estimate retrograde trafficking of Shiga toxin subunit B (STxB)-Cy3.	LOPAC
-0.439075	0.608815	N6- Cyclopentyladeno sine	adenosine receptor subclass A3 ligand	LOPAC
-0.438537	0.807008	Moxonidine hydrochloride	a new-generation centrally acting antihypertensive drug approved for the treatment of mild to moderate essential hypertension.	LOPAC
-0.438044	0.62681	Zidovudine (3'-Azido-3'-Deoxythymidine)	has been used as the reverse transcriptase inhibitor to inhibit the viral genome integration[1] and as an antimicrobial agent to evaluate its anti-Salmonella activity.	FDA
-0.437641	0.605886	Mexiletine·HCl	Class IB antiarrhythmic; sodium channel blocker	FDA
-0.43689	0.623866	Nitisinone	a competitive inhibitor that reversibly inhibits 4-Hydroxyphenylpyruvate oxidase (dioxygenase). Nitisinone is used in the treatment of hereditary tyrosinemia type 1, where it blocks the degradation of tyrosine into harmful substances.	FDA
-0.436774	0.473928	4-(2- Aminoethyl)benzene sulfonyl fluoride hydrochloride	Irreversible serine protease inhibitor. Inhibition constants are similar to those of PMSF and DFP. AEBSF has been shown to inhibit trypsin, chymotrypsin, plasmin kallikrein and thrombin. As an alternative to PMSF and DFP, AEBSF offers lower toxicity, improved solubility in water and improved stability in aqueous solutions. AEBSF has been used in cell culture in concentrations of up to 0.25 mM.	LOPAC
-0.436572	0.854505	ML240	a selective, ATP-competetive inhibitor of AAA ATPase p97, also called valosine containing protein (VCP). The IC50 for p97 inhibition is 110 nM. ML240 rapidly induces activity of Caspases 3 and 7, leading to apoptosis. ML240 has potent antiproliferative activity towards NCI-60 cancer cell lines.	LOPAC
-0.436284	0.671227	Mycophenolate Mofetil	a rate-limiting enzyme in de novo synthesis of guanosine nucleotides. Mycophenolate mofetil is a prodrug of mycophenolic acid (Cat. # M5255) that is cleaved by nonspecific esterases in vivo to produce the parent compound. Mycophenolic acid blocks inosine monophosphate dehydrogenase and is a potent immunosuppresive agent.	FDA
-0.431178	0.605592	Bethanechol chloride	used to treat certain bladder problems such as the inability to urinate or empty the bladder completely due to certain causes (e.g., surgery, bladder muscle problems).	LOPAC
-0.429866	0.776637	Nylidrin hydrochloride	A beta-adrenergic agonist. Nylidrin causes peripheral vasodilation, a positive inotropic effect, and increased gastric volume of gastric juice.	LOPAC
-0.429446	0.681909	Fusaric acid	Dopamine β-hydroxylase inhibitor.	LOPAC
-0.429264	0.703562	Diazoxide	a potassium channel activator. Its mechanism of action revolves around enhancing cell membrane permeability to potassium ions.	FDA
-0.428399	0.679499	Xylometazoline hydrochloride	α-adrenoceptor agonist; imidazoline binding site ligand.	LOPAC
-0.427738	0.69519	Cimetidine	H2 histamine receptor antagonist; I1 imidazoline receptor agonist; anti-ulcer agent. Blocks cancer metastasis by inhibiting the expression of E-selectin on the surface of endothelial cells, thus blocking tumor cell adhesion.	LOPAC
-0.427327	0.498093	Kaempferol-7-neohesperidoside	shown to have anti-proliferative effects on a variety of human cancer cell lines in vitro	Natural
-0.427327	0.571204	Corydaline	an acetylcholinesterase inhibitor isolated from Corydalis yanhusuo	Natural
-0.426939	0.671823	Tipiracil hydrochloride	an inhibitor of thymidine phosphorylase. Tipiracil is used in combination with trifluridine as TAS-102 for the treatment of refractory metastatic colorectal cancer. Tipiracil increases the bioavailability of trifluridine by blocking the enzyme that would otherwise protect the tumors by metabolizing trifluridine.	LOPAC
-0.426568	0.629896	Euphorbiasteroid	a tricyclic diterpene that has been found in the plant E. lathyris.1 It inhibits early-stage adipogenesis of 3T3-L1 cells, decreasing intracellular triglyceride accumulation when used at concentrations of 25 and 50 µM.2 It decreases the expression of Fas, C/EBPα, PPARγ, and SREBP-1c and increases phosphorylation of AMP-activated protein kinase (AMPK) and acetyl-coenzyme A carboxylase (ACC) in 3T3…	Natural
-0.426065	0.403913	Myricitrin	found in plants, e.g. in the bark of Myrica esculenta (Myricaceae) and in the leaves of Myrica gale and in Chrysobalanus icaco. It is a feeding stimulant for some leaf beetles[6]; and shown to have strong antioxidant activity against DPPH.[4] Myricitrin may be of potential interest in the management of inflammatory conditions[3], and could constitute an attractive molecule of interest for the dev…	Natural
-0.426065	0.628377	Palmatine chloride	a natural compound found in the rhizomes of Coptis chinensis. Palmatine chloride is a uterine contractant and shows antibacterial and antimalarial properties.	Natural
-0.425823	0.272548	Protopine	a Ca2+ channel blocker and antiplatelet agent.	Natural
-0.425521	0.756964	ICI 204,448 hydrochloride	Peripherally acting κ agonist.	LOPAC
-0.424007	0.813837	Sertaconazole	a synthetic imidazole derivative, containing a benzothiophene ring, with antifungal, antibacterial, anti-inflammatory and anti-pruritic activity.	FDA
-0.423796	0.745501	SR9243	a selective inverse agonist of the nuclear receptor liver-X-receptor (LXR) that targets the Warburg effect, inhibiting glycolysis and lipogenesis by reducing glycolytic and lipogenic gene expression. SR9243 is believed to enhance corepressor recruitment to LXRs at target-gene promoters, resulting in suppression of gene expression. SR9243 induced apoptosis in tumor cells without harming normal cel…	LOPAC
-0.423437	0.414088	Ivermectin	Positive allosteric modulator of α7 neuronal nicotinic acetylcholine receptor; also modulates glutamate-GABA-activated chloride channels.	Natural
-0.423417	0.610118	Cycloserine	initially known as a tuberculostatic agent. It acts as a glutamatergic partial N-methyl-D-aspartate (NMDA) agonist. It binds at the glycine-binding site of the NMDA receptor and enable the opening of the NMDA channel.	FDA
-0.422673	0.704353	Prednisolone	a glucocorticoid with anti-inflammatory and immunosuppressive activity.	FDA
-0.42252	1.11881	cis-Piperidine-2,3- dicarboxylic acid	NMDA receptor agonist at the glutamate recognition site.	LOPAC
-0.421494	0.649102	Argatroban monohydrate	a potent, seletive, univalent direct inhibitor of thrombin. It directly inhibits thrombin by binding only to its active site (thus univalent) as compared to Bivalent DTIs (hirudin and analogs) which bind both to the active site and exosite 1.	LOPAC
-0.421016	0.530096	Bromfenac	a nonsteroidal anti inflammatory drug (NSAID) that inhibits both COX1 and COX2. It is used as an opthalmic analgesic.	FDA
-0.420346	0.759145	Imatinib Mesylate	a tyrosine kinase inhibitor with antineoplastic activity. Imatinib is a potent inhibitor of the Bcr-Abl kinase encoded by the bcr-abl oncogene as well as receptor tyrosine kinases encoded by c-kit and platelet-derived growth factor receptor (PDGFR) oncogenes. Imatinib mesylate inhibition of Bcr-Abl tyrosine kinase created by the Philadelphia chromosome abnormality found in CML decreases prolifera…	FDA
-0.419611	0.710363	Lavendustin B	a competitive inhibitor of glucose transporter 1 (Glut1; Ki = 15 µM).1 It is also an inhibitor of the interaction between HIV-1 integrase and LEDGF/p75 (IC50 = 94.07 µM).2 Lavendustin B is a weak inhibitor of tyrosine kinases (IC50 = 0.49 µg/ml) and has been used as a negative control for the protein tyrosine kinase inhibitor lavendustin A	Natural
-0.419142	0.532672	SBHA	A cell-permeable bishydroxamic acid histone deacetylase (HDAC) inhibitor with anti-tumor properties. Causes an increase in acetylated histone H4 in MEL cells and inhibits the human HDAC1 and HDAC3 activities with a similar potency (ID50 ~ 250-300 nM). Belongs to the hybrid polar class of compounds that acts both as inducers of differentiation of transformed cells and apoptosis. Suppresses the gro…	Epigenetic
-0.417607	0.386364	Saquinavir Mesylate	an HIV Protease Inhibitor used in antiretroviral therapy. It inhibits both HIV-1 and HIV-2 proteases. Studies have also looked at saquinavir as a possible anti-cancer agent.	FDA
-0.417594	0.608554	Ellipticine	A cell-permeable antitumor alkaloid that acts as an inhibitor of topoisomerase II and acts as an intercalative agent that stimulates topoisomerase II-mediated DNA breakage. Is also capable of uncoupling mitochondrial oxidative phosphorylation.	LOPAC
-0.416748	0.63202	SB 204741	a potent and selective antagonist at the serotonin 5-HT2B receptor	LOPAC
-0.41633	0.811874	SBI-0087702	A cell permeable naphthalene derivative that promotes the translocation of ATF2 from nucleus to mitochondria via PKCe that results in mitochondrial membrane leakage and cell death in melanoma cells	LOPAC
-0.415644	0.546549	Cefoxitin·Na	a β-lactam antibiotic derived from cephamycin C. It is used for intravenous and intramuscular injections.[3] It is found to be active against Bacteroides and is therapeutically used for the treatment of mixed aerobic-anaerobic infections	FDA
-0.414566	0.681667	GW9508	a selective FFA1/GPR40 agonist.	LOPAC
-0.413982	1.00533	2-Phenylamino adenosine	Selective A2 adenosine receptor agonist; potent coronary vasodilator; weak inhibitor of adenosine uptake by rat cerebral cortical synaptosomes.	LOPAC
-0.413197	0.391509	Perillic acid	a perillyl derivative with potent antimicrobial and anticancer activity. It can be prepared via bio-oxidation of R-(+)-limonene.	Natural
-0.412536	0.623014	Indole-3-acetic acid	a natural phytohormone (plant auxin) used as a supplement in media such as Murashige and Skoog media and Gamborg’s B5 media. IAA is a plant signaling molecule involved in plant organogenesis and growth control	Natural
-0.412154	0.453588	Quinine·HCl·2H2O	widely used in the treatment of malaria. It possesses erythrocytic and gametocytocidal action against Plasmodium sp. It also serves as an analgesic drug. Upon administration, quinine is present mostly bound to α-1 acid glycoprotein in the body fluids. Quinine has the ability to cross the placenta and the blood brain barrier. It has a half-life of 11-18 hours. Tinnitus, hearing defects, nausea and…	Natural
-0.411941	0.518868	Mycophenolic acid	produced by Penicillum brevi-compactum, is a selective inhibitor of inosine monphosphate dehydrogenase, thus inhibiting DNA synthesis in T and B lymphocytes. It has also been shown to act as an immunosuppressive agent, and as an inducer of monocyte differentiation and apoptosis in human lymphoid and monocytic cell lines	Natural
-0.410557	0.491461	Sinensetine	a citris flavonoid with anti-inflammatory and anti-proliferative activity. It has also been shown to enhance adipogenesis and lipolysis.	Natural
-0.410557	0.625229	Wogonin	an anti-inflammatory agent and COX-2 inhibitor, which inhibits the induction of both iNOS and COX-2. Wogonin inhibits COX-2 (IC50 = 46 μM) without affecting COX-1. Wogonin inhibits iNOS induction and thus inhibts activation-induced C6 glial cell death. Specifically, Wogonin inhibits NF-kappaB-mediated iNOS induction.	Natural
-0.41027	0.632325	Pimaricin	An antifungal polyene macrolide that binds specifically to ergosterol and blocks fungal growth. However, unlike nysatin and filipin, pimaricin does not change the permeability of the plasma membrane	Natural
-0.409306	0.630864	DL-Homatropine hydrobromide	Muscarinic acetylcholine receptor antagonist	LOPAC
-0.409134	0.727997	FPL 64176	Potent activator of L-type Ca2+ channels (EC50 = 16 nM). 40-fold more potent than Bay K 8644 (Cat. No. 1544) as a positive inotrope in guinea pig atria.	LOPAC
-0.409007	0.50926	Sedanolide	Inducer of glutathione S-transferases and inhibitor of chemically induced carcinogenesis. Mosquitocidal, nematicidal and antifungal. Was shown to inhibit cyclooxygenase-1 and -2 (COX-1 and COX-2) as well as topoisomerase I and topoisomerase II.	Natural
-0.40875	0.675784	4-Hydroxy phenethylamine HCl	Phenethylamine, being similar to amphetamine in its action at their common biomolecular targets, releases norepinephrine and dopamine.[12][13][34] Phenethylamine also appears to induce acetylcholine release via a glutamate-mediated mechanism.[35]Phenethylamine has been shown to bind to human trace amine-associated receptor 1 (hTAAR1) as an agonist	LOPAC
-0.408479	0.619007	Lacosamide	It is proposed that lacosamide's inhibition of sodium channels is responsible for analgesia. Lacosamide may be selective for inhibiting depolarized neurons rather than neurons with normal resting potentials. Pain and nociceptor hyperexcitability are associated with neural membrane depolarization. Lacosamide binds to collapsin response mediator protein-2 (CRMP-2), a phosphoprotein which is express…	FDA
-0.407212	0.75634	Montelukast·Na	Montelukast is in the leukotriene receptor antagonist family of medications.[3] It works by blocking the action of leukotriene D4 in the lungs resulting in decreased inflammation and relaxation of smooth muscle.[	FDA
-0.406873	0.2073	Posaconazole	a triazole antifungal agent, posaconazole blocks the synthesis of ergosterol, a key component of the fungal cell membrane, through the inhibition of the enzyme lanosterol 14α-demethylase and accumulation of methylated sterol precursors	FDA
-0.406853	0.809963	Eprosartan mesylate	blocks the vasoconstrictor and aldosterone-secreting effects of angiotensin II by selectively blocking the binding of angiotensin II to the AT1 receptor found in many tissues (e.g., vascular smooth muscle, adrenal gland).	LOPAC
-0.406056	0.644012	Tyrphostin AG 112	an inhibitor of the epidermal growth factor receptor (EGFR).	LOPAC
-0.405373	0.751917	Palonosetron hydrochloride	the hydrochloride salt of palonosetron, a carbazole derivative and a selective serotonin receptor antagonist with antiemetic activity. Palonosetron competitively blocks the action of serotonin at 5-hydroxytryptamine type 3 (5-HT3) receptors located on vagal afferents in the chemoreceptor trigger zone (CTZ), resulting in suppression of chemotherapy-induced nausea and vomiting.	LOPAC
-0.404859	0.755593	Penicillin V Potassium	a slow-onset antibiotic that is used to treat many types of mild to moderate infections caused by bacteria, including scarlet fever, pneumonia, skin infections, and infections affecting the nose, mouth, or throat. Penicillin V potassium is also used to prevent the symptoms of rheumatic fever.	FDA
-0.404718	0.685444	UNC 0646	Potent and selective inhibitor of the homologous protein lysine methyltransferases, G9a and GLP (IC50 values are 6 nM and 15 nM for G9a and GLP, respectively). Potently blocks G9a/GLP methyltransferase activity in cells (IC50 = 10 nM in MCF7 cells); exhibits low cellular toxicity (EC50 = 4.7 μM in MCF7 cells). Selective for G9a/GLP over a range of other protein lysine methyltransferases and prote…	Epigenetic
-0.404459	0.617241	(+-)-Epinephrine hydrochloride	the hydrochloride salt of the naturally occurring sympathomimetic amine with vasoconstricting, intraocular pressure-reducing, and bronchodilating activities. By stimulating vascular alpha-adrenergic receptors, epinephrine causes vasoconstriction, thereby increasing vascular resistance and blood pressure.	LOPAC
-0.404136	0.684536	Caroverine HCl	a nonselective NMDA and AMPA glutamate receptor antagonist. Also, Caroverine hydrochloride is a class B calcium-channel-blocker, antiglutamatergic agent, and acts as an antioxidant when administered to lab animals.	LOPAC
-0.403993	0.680465	Atazanavir	antiretroviral drug of the protease inhibitor (PI) class. Like other antiretrovirals, it is used to treat infection of human immunodeficiency virus (HIV).	FDA
-0.403753	0.717155	U-62066	Highly selective κ opioid receptor agonist; antitussive.	LOPAC
-0.403023	0.788428	Sulfaphenazole	a sulfonamide that is sulfanilamide in which the sulfonamide nitrogen is substituted by a 1-phenyl-1H-pyrazol-5-yl group. It is a selective inhibitor of cytochrome P450 (CYP) 2C9 isozyme, and antibacterial agent. It has a role as an antibacterial drug, an EC 1.14.13.181 (13-deoxydaunorubicin hydroxylase) inhibitor, an EC 1.14.13.67 (quinine 3-monooxygenase) inhibitor and a P450 inhibitor.	LOPAC
-0.402105	0.721094	Theobromine	Theobromine possesses antitussive action and might be useful in treating acute and chronic cough.[1] It is a catabolic product of caffeine and shows antioxidant and prooxidant properties.[2] Phosphosdiesterase inhibitor; weak adenosine receptor antagonist; diuretic; smooth muscle relaxant.	LOPAC
-0.402095	0.367647	Chaetomellic acid A	Potent inhibitor of farnesyltransferase in isolated enzyme assays (IC50=55nM) but is inactive in whole cells. Inhibition of farnesyltransferase is selective over geranylgeranyltransferase I and II (IC50=92µM and 34µM respectively).	Natural
-0.401833	0.626293	Darunavir	Darunavir has been sanctioned by the food and drug administration (FDA) as the first treatment of drug-resistant human immunodeficiency virus (HIV).[1] Darunavir is a second-generation antiviral HIV protease inhibitor with broad spectrum activity	FDA
-0.401244	0.699886	(±)-Verapamil hydrochloride	a phenylalkylamine calcium channel blocker used in the treatment of high blood pressure, heart arrhythmias, and angina, 16 and was the first calcium channel antagonist to be introduced into therapy in the early 1960s.	LOPAC
-0.401084	0.691802	Genipin	stimulates insulin secretion in UCP2-dependent manner (Uncoupling protein 2). Genipin is a protein, collagen, gelatin, and chitosan cross-linker.	LOPAC
-0.400925	0.552943	Doxepin·HCl	a psychotropic agent with antidepressant and anxiolytic properties.9 It is a tertiary amine that can be presented as (E) and (Z) stereoisomers with the (Z) stereoisomer corresponding to cidoxepin. Doxepin commonly produces a 5:1 (E):(Z) racemic mixture.8	FDA
-0.398999	0.4258	Picrotoxin	a toxin obtained from the seeds of the shrub Anamirta cocculus. It is used as a central nervous system stimulant, antidote, convulsant, and GABA (gamma aminobutyric acid) antagonist. It is a noncompetitive antagonist at GABAA receptors and thus a convulsant.	Natural
-0.398999	0.658012	6-Acetamido-6-deoxy-castanospermine	an O-GlcNAcase inhibitor	Natural
-0.398808	0.614256	Desipramine·HCl	the hydrochloride salt form of desipramine, a secondary amine tricyclic antidepressant (TCA). In the central nervous system (CNS), desipramine hydrochloride blocks the re-uptake of neurotransmitters, including norepinephrine and serotonin. This leads to an increase in the amount of these neurotransmitters in the synaptic cleft and prolongs their activities postsynaptically	FDA
-0.397518	0.640149	Naratriptan·HCl	a serotonin 5-HT1B/1D receptor agonist.	FDA
-0.397219	0.658261	CID2858522	specifically inhibits NF-kB activation downstream of protein kinsase C (PKC). CID2858522 dose dependently inhibits NF-kB reporter activity in PMA-ionomycin stimulated HEK293 cells, but does not affect NF-kB activity in cells challenged with TNFa, retinoic acid, or stimulation of the toll-like receptor signaling pathway.	LOPAC
-0.396331	0.674126	Tetrahydrozoline hydrochloride	the hydrochloride salt form of tetrahydrozoline, an imidazole derivative with sympathomimetic property. Applied locally to the eye or nose, tetrahydrozoline binds to and activates alpha-adrenergic receptors, resulting in vasoconstriction and decreased nasal and ophthalmic congestion.	LOPAC
-0.396322	0.314738	Rosuvastatin Calcium	Rosuvastatin calcium is a competitive inhibitor of hydroxymethylglutaryl-coenzyme A (HMG-CoA) reductase, the enzyme that catalyzes the conversion of HMG-CoA to mevalonic acid, the rate-limiting step in cholesterol biosynthesis. Rosuvastatin calcium is antilipemic and is used to reduce plasma cholesterol levels and prevent cardiovascular disease.	FDA
-0.396069	0.645916	Paliperidone	the primary active metabolite of risperidone. The mechanism of action is unknown but it is likely to act via a similar pathway to risperidone. It has been proposed that the drug's therapeutic activity in schizophrenia is mediated through a combination of central dopamine Type 2 (D2) and serotonin Type 2 (5HT2A) receptor antagonism. Paliperidone is also active as an antagonist at alpha 1 and alpha…	FDA
-0.395363	0.849833	(+-)-Metoprolol (+)- tartrate salt	β1-adrenoceptor antagonist.	LOPAC
-0.39532	0.619456	Penicillin G Potassium (Benzylpenicillin)	also known as penicillin G, is an antibiotic used to treat a number of bacterial infections. This includes pneumonia, strep throat, syphilis, necrotizing enterocolitis, diphtheria, gas gangrene, leptospirosis, cellulitis, and tetanus. It is not a first-line agent for pneumococcal meningitis.	FDA
-0.394713	0.525346	Kaempferol	Potent inhibitor of osteoclastic bone resorption. The effect is believed to be attributable to both the antioxidant and estrogenic activities of kaempferol.	Natural
-0.394472	0.637435	Nortriptyline·HCl	Tricyclic antidepressant that is a more potent inhibitor of the norepinephrine transporter (Ki = 3.4 nM) than the serotonin transporter (Ki = 161 nM). 5-HT2 serotonin receptor antagonist.	FDA
-0.39432	0.635475	5-hydroxydecanoic acid sodium salt	Blocks post-ischemic actions of the K+ channel activator cromakalim	LOPAC
-0.394275	0.660311	Bropirimine	an immunostimulating agent. The compound induces production of α and β interferons and enhances NK cell function. Bropirimine has antiproliferative effects in cancer cell lines and tumor growth in in vivo models.	LOPAC
-0.393782	0.717395	Vinpocetine	has been shown to be selective inhibitor of Ca(2+)-calmodulin dependent cGMP-PDE. It is assumed that this inhibition enhances intracellular a GMP levels in the vascular smooth muscle leading to reduced resistance of cerebral vessels and increase of cerebral flow.	LOPAC
-0.393544	0.722772	5alpha-Pregnan- 3alpha-ol-20-one	a positive allosteric modulator of γ-aminobutyric acid (GABA) A receptor (GABAA). It is also called pregnan and during pregnancy it modulates the atrial volume receptors transducer properties.	LOPAC
-0.393176	0.617751	Flavokawain A	a Novel Chalcone From Kava Extract, Induces Apoptosis in Bladder Cancer Cells by Involvement of Bax Protein-Dependent and Mitochondria-Dependent Apoptotic Pathway and Suppresses Tumor Growth in Mice	Natural
-0.391453	0.320081	Valinomycin	K+-selective ionophoric cyclodepsipeptide; potassium ionophore which uncouples oxidative phosphorylation, induces apoptosis in murine thymocytes, inhibits NGF-induced neuronal differentiation and antagonizes ET-induced vasoconstriction.	Natural
-0.391295	0.34097	Swainsonine	a potent α-mannosidase inhibitor. It also has antimetastatic, antiproliferative, and immunomodulatory activity [1]. It also inhibits glycoprotein processing.	Natural
-0.391165	0.38292	Rifaximin	Acts by inhibiting RNA synthesis in susceptible bacteria by binding to the beta-subunit of bacterial deoxyribonucleic acid (DNA)-dependent ribonucleic acid (RNA) polymerase enzyme. This results in the blockage of the translocation step that normally follows the formation of the first phosphodiester bond, which occurs in the transcription process.	FDA
-0.390833	0.665861	Cefotaxime sodium salt	Broad spectrum third generation cephalosporin antibiotic; interferes with cell wall synthesis	LOPAC
-0.390575	0.572817	S(-)-Schisandrin A	Schizandrin is a natural product with several biological properties involved with antioxidant and anti-inflammatory activities. It reduces the formation of ROS, inhibits the mitochondrial pathway of the apoptotic process and oxidative stress. Schizandrin has been reported to have hepatoprotective, antitumor, antiviral, and antiamnesic effects, and has neuroprotective activity against glutamate in…	Natural
-0.390572	0.642011	McN-A-343	M1 muscarinic acetylcholine receptor agonist.	LOPAC
-0.389312	0.671104	U0126	Specific inhibitor of MEK1 and MEK2 (MAP kinase kinase; MAPKK); also inhibits a constitutively active, mutant form of MEK	LOPAC
-0.388396	0.642515	(±)-8-Hydroxy- DPAT hydrobromide	a full 5-HT1A serotonin receptor agonist; active enantiomer of (±)-8-hydroxy-DPAT.	LOPAC
-0.387636	0.457547	Resveratrol	a phenolic phytoalexin found in grape skin and other plants. It has intracellular antioxidant activity and activates sirtuin 1 (SIRT1), a nicotinamide adenine dinucleotide (NAD+)-dependent histone deacetylase involved in mitochondrial biogenesis and the enhancement of peroxisome proliferator-g-activated receptor coactivator-1a (PGC-1a) and FOXO (forkhead box) activity. The anti-diabetic, neuropro…	Natural
-0.385403	0.601307	Wortmannin from Penicillium funiculosum	Potent and specific phosphatidylinositol 3-kinase (P13-K) inhibitor	LOPAC
-0.384516	0.293614	Chrysine	a flavonoid and an analog of apigenin. It inhibits aromatase and also suppresses human immunodeficiency virus (HIV) activation in models with latent infection. Chrysin exhibits anti-inflammatory and anti-oxidant effects. This molecule induces apoptosis in various cells, thereby exhibiting cancer chemopreventive activity.[2] Chrysin can modulate the activity of GABAA (Type-A γ-aminobutyric acid) a…	Natural
-0.384367	0.758566	INDY	INDY is a potent inhibitor of Dyrk1A and Dyrk1B (dual-specificity tyrosine-phosphorylation-?egulated kinase 1).	LOPAC
-0.382853	0.563043	Nicotinamide	Nicotinamide is an amide derivative of vitamin B3 and a PARP inhibitor	Epigenetic
-0.38222	0.744319	Naftopidil dihydrochloride	alpha1 Adrenoceptor antagonist; antihypertensive	LOPAC
-0.382165	0.667177	Anisodamine	a muscarinic receptor antagonist. Anisodamine is a naturally occurring atropine derivative isolated from Scopolia Tangutica Maxim plant indigenous to Tibet. Anisodamine is a non‐specific cholinergic antagonist. It is considered less efficient and less toxic than atropine. Anisodamine interferes with liposome structure and affects cell membrane. It might act as an anti‐oxidant, in protecting again…	Natural
-0.380856	0.68473	Bicalutamide	Competes with androgen for the binding of androgen receptors, consequently blocking the action of androgens of adrenal and testicular origin which stimulate the growth of normal and malignant prostatic tissue.	FDA
-0.380609	0.838743	Lomefloxacin hydrochloride	DNA gyrase inhibitor	LOPAC
-0.380466	0.387052	Rifapentine	Inhibits DNA-dependent RNA polymerase in susceptible strains of M. tuberculosis. Rifapentine acts via the inhibition of DNA-dependent RNA polymerase, leading to a suppression of RNA synthesis and cell death.	FDA
-0.380042	0.694721	Oxyacanthine sulfate	an alkaloid used for the treatment of various inflammatory diseases such as lumbago, rheumatism and to reduce fever.	Natural
-0.376706	0.805661	2-Chloro-2-deoxy- D-glucose	Derivative of D-(+)-Glucose	LOPAC
-0.376491	0.582396	1-Aminobenzo triazole	1-Aminobenzotriazole (1-ABT) is used as an in vitro tool in drug discovery. It can differentiate the P450 from non-P450 enzyme systems. 1-ABT exhibits inhibitory action by covalent alteration of the heme prosthetic group in the P450 enzym	LOPAC
-0.372716	0.645684	Santonin	antihelminthic; Santonin has the effect of paralyzing the anterior (front) end of the worm, while having a stimulant effect on the posterior end, depending on the concentration. Because of this, the worm cannot coordinate itself, and loses its ability to maintain its position in the host	Natural
-0.372029	0.798182	Piceatannol	Non-receptor kinase Syk and Lck inhibitor	LOPAC
-0.37057	0.563506	β-Ecdysone	a steroidal prohormone of the major insect molting hormone 20-hydroxyecdysone, which is secreted from the prothoracic glands.	Natural
-0.370014	0.811653	Luliconazole	Luliconazole is an imidazole antifungal	LOPAC
-0.369638	0.683796	Tolazamide	Oral hypoglycemic agent; stimulates pancreatic islet cells to secrete insulin	LOPAC
-0.369435	0.720224	Amphotericin B	Amphotericin B is fungistatic or fungicidal depending on the concentration obtained in body fluids and the susceptibility of the fungus. The drug acts by binding to sterols (ergosterol) in the cell membrane of susceptible fungi. This creates a transmembrane channel, and the resultant change in membrane permeability allowing leakage of intracellular components. Ergosterol, the principal sterol in …	Natural
-0.368832	0.417335	Ceftriaxone·Na	3rd Generation cefalosporin. Bacterial cell-wall synthesis inhibitor.	FDA
-0.368146	0.586421	Dopamine·HCl	Non-selective dopamine receptor agonist.	FDA
-0.367959	0.657807	Glipizide	ATP-dependent K+ channel blocker	LOPAC
-0.367893	0.297521	Travoprost	Selective FP prostanoid receptor agonist believed to reduce intraocular pressure by increasing the drainage of aqueous humor.	FDA
-0.367323	0.736417	Dicyclomine hydrochloride	Competitive muscarinic acetylcholine receptor antagonist	LOPAC
-0.367104	0.643281	Urapidil, 5-Methyl-	Selective alpha1A adrenoceptor antagonist; antihypertensive	LOPAC
-0.367027	0.372432	(±)-Anabasine	an alkaloid that has been found as a minor component in tobacco (Nicotiana). 1 It is a full agonist of nicotinic acetylcholine receptors	Natural
-0.366167	0.813126	(±)-Methoxy verapamil HCl	Blocks L-type Ca2+ channels	LOPAC
-0.365422	0.42779	Rhoifolin	a natural glycoside of apigenin, has been obtained from the green leaves of Rhus succedanea and possesses a variety of significant biological activities including antioxidant, anti-inflammatory, antimicrobial, hepatoprotective and anticancer effects	Natural
-0.365274	0.722896	DBO-83	Nicotinic acetylcholine receptor agonist	LOPAC
-0.364613	0.418044	Theophylline	Competitive Nonselective Phospho-diesterase Inhibitor and Nonselective Adenosine Receptor Antagonist.	FDA
-0.364531	0.679376	S(-)-Timolol maleate	beta Adrenoceptor antagonist; antihypertensive; antiarrhythmic; antiglaucoma agent	LOPAC
-0.364509	0.885428	MDL 28170	Cell permeable calpain I and II inhibitor	LOPAC
-0.363632	0.580443	Methoxsalen (Xanthotoxin)	After activation it binds preferentially to the guanine and cytosine moieties of DNA, leading to cross-linking of DNA, thus inhibiting DNA synthesis and function. Potent suicide inhibitor of cytochrome P450.	FDA
-0.363535	0.8213	Zolmitriptan	Selective serotonin receptor agonist of the 1B and 1D subtypes	FDA
-0.362955	0.565305	Cytosine-1-beta-D- arabinofuranoside hydrochloride	Ara-C is phosphorylated to Ara-CTP and is incorporatee into DNA. It inhibits DNA replication by forming cleavage complexes with topoisomerase I resulting in DNA fragmentation, and ultimately induces apoptosis via the PKC signaling pathway. Does not inhibit RNA synthesis. Anti-leukemia agent.	LOPAC
-0.362767	0.244609	Indirubin	Indirubin exerts its effects on the human body by downregulating expression of genes. Genes PLK1 and PIN1, both oncogenic, have been shown to be affected by indirubin. Indirubin has, in vitro and in vivo, been shown to reduce expression of the CDC25B gene, which codes for production of CDC25B enzyme.indirubin and derivatives are potent ATP-competitive inhibitors of CDKs and GSK3ß achieving IC50 v…	Natural
-0.36193	0.879707	NG-Nitro-L- arginine	Nω-Nitro-L-arginine/L-NNA helps to reduce the levels of cortical hyperemia and brain cGMP occurring due to hypercapnia. Irreversible inhibitor of constitutive nitric oxide synthase (nNOS) and a reversible inhibitor of inducible nitric oxide synthase (iNOS).	LOPAC
-0.361893	0.656233	YS-035 hydrochloride	L-type Ca2+ channel blocker; verapamil derivative	LOPAC
-0.361254	0.637177	Clozapine	Atypical neuroleptic agent which display greater affinity for the D4 dopamine receptors over D2 or D3	LOPAC
-0.361194	0.853333	Nimustine hydrochloride	Antineoplastic; bifunctional nitrosourea alkylating anticancer agent	LOPAC
-0.360589	0.715568	Amisulpride	selective D2/D3 dopamine receptor antagonist and atypical antipsychotic	LOPAC
-0.359969	0.458253	α-Solanine	a steroidal glycoalkaloid mainly found in potatoes.[1] It is a potential anti-carcinogenic agent against pancreatic cancer cells.	Natural
-0.359742	0.418044	Tenofovir	Tenofovir is a nucleotide analogue reverse transcriptase inhibitor (nRTI) that causes premature termination of DNA transcription. Tenofovir is an antiretroviral used for HIV treatment and prevention.	FDA
-0.358851	0.603172	Nepafenac	a prodrug of amfenac,[2] is used in the treatment of diabetic retinopathy.[1] It is metabolized to its active form through intraocular enzymatic hydrolysis.[2] Nepafenac has a molecular weight of 254.28 kDa and effectively penetrates through the cornea.[3] Its molecule structure enables nepafenac to possess better permeability. Nepafenac has a low inhibitory effect on cyclooxygenase.[3	FDA
-0.35883	0.697727	L2-b	L2-b is a bifunctional Aß-interacting, metal-chelating molecule that modulates ROS production in, and improves survival of neuroblastoma cells incubated in the presence of Aß along with Copper or Zinc	LOPAC
-0.358607	0.751257	Cytidine 5'- diphosphocholine sodium salt hydrate	Cytidine 5′-diphosphocholine (CDP-choline) is generated by choline-phosphate cytidylyltransferase EC 2.7.7.15 in support of the synthesis of phosphatidylcholine. CDP-choline is being used in studies of its affects on neurorecovery.	LOPAC
-0.354547	0.530096	Cefditoren Pivoxil	3rd Generation cefalosporin. Bacterial cell-wall synthesis inhibitor.	FDA
-0.354234	0.692974	Retinoic acid	all−trans−Retinoic acid (ATRA) is a ligand for both the retinoic acid receptor (RAR) and the retinoid X receptor (RXR). The bound RAR and RXR act as transcription factors that regulate the growth and differentiation of both normal and malignant cells. Cytochromes P450 (CYPs) catalyze the 4-hydroxylation of ATRA. Retinoic acid primes embryonic stem cells to become neurons.	LOPAC
-0.353108	0.875604	Nicardipine hydrochloride	Blocks L-type voltage-dependent calcium channels; antihypertensive.	LOPAC
-0.351491	0.649648	Nadolol	β-Adrenergic blocker	FDA
-0.350825	0.805588	PRE-084	Potent and highly selective sigma1 receptor agonist	LOPAC
-0.350542	0.464931	Citreoviridin	a mycotoxin isolated from several Penicillium species that has been shown to inhibit the mitochondrial ATP synthetase system.	Natural
-0.350542	0.646997	Visnagin	Found in the toothpick-plant, Ammi visnaga. It has a role as a phytotoxin, an EC 1.1.1.37 (malate dehydrogenase) inhibitor, a vasodilator agent, an antihypertensive agent, an anti-inflammatory agent and a plant metabolite.	Natural
-0.349975	0.261356	Veratramine	Voltage-gated Na+ channel opener; increases intracellular Ca2+ with no effect on the Na+/Ca2+ exchanger. Steroid-derived alkaloid neurotoxin. Increases membrane Na+ permeability and depolarizes excitable tissues.	Natural
-0.349888	0.696443	Penciclovir	Penciclovir is converted to its active form, penciclovir triphosphate, by cellular kinases. It inhibits viral DNA polymerase by competing with deoxyguanosine triphosphate. It inhibits DNA synthesis of virus-infected cells. Penciclovir has in vitro activity against herpes simplex virus types 1 (HSV-1) and 2 (HSV-2). It does not inhibit DNA synthesis in non-infected cells. Mode of resistance is via…	FDA
-0.349628	0.67205	Tolmetin sodium dihydrate	a nonsteroidal anti-inflammatory drug (NSAID) that inhibits prostaglandin synthetase in vitro and reduces plasma levels of prostaglandin E. Tolmetin sodium exhibits anti-inflammatory, analgesic and antipyretic activity Its precise mechanism of is unknown. Tolmetin is used to treat rheumatoid arthritis, osteoarthrosis, pain, and ankylosing spondylitis.	FDA
-0.349437	0.532345	Quisqualic acid	Active enantiomer of quisqualic acid; excitatory amino acid at glutamate receptors.	Natural
-0.349369	0.820835	Metoclopramide·HCl	D2 antagonist; 5-HT3 antagonist; antipsychotic; anti-emetic.	FDA
-0.346074	0.748949	BPTES	Selective inhibitor of Glutaminase GLS1.	LOPAC
-0.346035	0.602773	Panaxadiol	a triterpene sapogenin originally found in species of Panax (ginseng) and exhibits anticancer, cardioprotective, anti-arrhythmic, and antioxidative activities. It inhibits Ca2+ channels, decreasing channel open time and open state probability in vitro and displaying anti-arrhythmic potential.	Natural
-0.345231	0.669777	Sulindac	COX inhibitor; Anti-inflammatory	LOPAC
-0.344884	0.289084	Vinpocetin	Ca2+-calmodulin-dependent phosphodiesterase I (PDE1) inhibitor.	Natural
-0.344208	0.848165	6-Methyl-2- (phenylethynyl) pyridine hydrochloride	GRIN2B (glutamate ionotropic receptor NMDA type subunit 2B) plays an important role in the growth of neurons and is highly essential for learning and memory.[1] GRIN2B mutation is associated with neuropsychiatric and developmental disorders[1] like schizophrenia, Parkinson′s disease and bipolar disorder.[2] MPEP (2-methyl-6-(phenylethynyl)pyridine hydrochloride) is used to treat Alzheimer′s disea…	LOPAC
-0.343407	0.5421	Clotrimazole	Specific inhibitor of Ca2+-activated K+ channels	LOPAC
-0.34235	0.768406	SP 600125	Selective c-Jun N-terminal kinase (c-JNK) inhibitor.	LOPAC
-0.342318	0.615761	Desoximetasone	Corticosteroids are thought to act by the induction of phospholipase A2 inhibitory proteins, collectively called lipocortins. This is achieved first by the drug binding to the glucocorticoid receptors which then translocates into the nucleus and binds to DNA causing various activations and repressions of genes. It is postulated that these proteins control the biosynthesis of potent mediators of i…	FDA
-0.341991	0.420799	Tetrahydrozoline·HCl	α-adrenoceptor agonist; imidazoline binding site ligand; vasoconstrictor.	FDA
-0.340701	0.614706	Mitotane	generally used to reduce the endogenous CORT neuropeptide, which might mask the total population of intracellular corticosteroid receptors in sparrows.[1] It is an adrenal specific agent, which can find potent applications in the treatment of adrenocortical carcinoma (ACC)	FDA
-0.33842	0.536393	Clomipramine·HCl	Tricyclic antidepressant; inhibits serotonin and norepinephrine transporters.	FDA
-0.336939	0.542536	Beclomethasone Dipropionate	a prodrug of an active metabolite beclomethasone 17-monopropionate (17-BMP)1 which acts on the glucocorticoid receptor to mediates its therapeutic action. Beclomethasone dipropionate itself posesses weak glucocorticoid receptor binding affinity and is rapidly converted into 17-BMP upon administration	FDA
-0.336908	0.683598	NS8593 hydrochloride	Selective KCa2 (SK) channel negative modulator; inhibits SK channel currents (Kd values are 0.42, 0.6 and 0.73 μM for SK1, SK2 and SK3 respectively at 0.5 μM Ca2+). Exhibits selectivity for SK channels over KCa1.1 (BK), KCa3.1 (IK), Kv, Nav and Cav channels. Inhibits afterhyperpolarization in hippocampal slices.	LOPAC
-0.336315	0.580453	DL-p- Chlorophenyl alanine methyl ester HCl	Tryptophan hydroxylase inhibitor. Crosses blood brain barrier better than p−chlorophenylalanine.	LOPAC
-0.336147	0.558731	Metolazone	a "water pill" (diuretic) that increases the amount of urine you make, which causes your body to get rid of excess water. This drug is used to treat high blood pressure.	FDA
-0.334515	0.836923	Methoctramine tetrahydrochloride	A drug that binds to but does not activate muscarinic cholinergic receptors, thereby blocking the actions of endogenous acetylcholine or exogenous agonists.	LOPAC
-0.333919	0.60899	Dexrazoxane	Dexrazoxane is a cardioprotective compound against anthracyclines. It functions by inhibiting topoisomerase II without inducing DNA strand breaks. Dexrazoxane is a + enantiomer of razoxane	FDA
-0.330482	0.333033	JNJ-26481585	Quisinostat (JNJ-26481585) 2HCl is a novel second-generation HDAC inhibitor with highest potency for HDAC1 with IC50 of 0.11 nM in a cell-free assay, modest potent to HDACs 2, 4, 10, and 11; greater than 30-fold selectivity against HDACs 3, 5, 8, and 9 and lowest potency to HDACs 6 and 7. Phase 2.	Epigenetic
-0.330279	0.693742	Tetramisole hydrochloride	Shows both immunostimulant and immunosuppressant effects, depending on several controllable factors. Very effective in treatment of ascariasis (hookworm infestation). Useful in chemotherapy of colorectal cancers, possibly due to its stimulation of IL-1 production and direct activation of macrophages.	LOPAC
-0.330239	0.67407	Hydroquinone	Hydroquinone acts as a skin depigmentation agent by inhibiting melanin synthesis. It inhibits the conversion of L-3,4- dihydroxyphenylalanine (L-DOPA) to melanin by inhibiting tyrosinase due to its structural similarity to an analog of melanin precursors	LOPAC
-0.329459	0.419137	Lincomycin	inhibits protein synthesis in susceptible bacteria by binding to the 50 S subunits of bacterial ribosomes and preventing peptide bond formation upon transcription. It is usually considered bacteriostatic, but may be bactericidal in high concentrations or when used against highly susceptible organisms	Natural
-0.328913	0.736702	Spermine tetrahydrochloride	Mixed NMDA agonist/antagonist at the polyamine site. Neuroprotective effects have been observed at high concentrations (1 mM), while neurotoxicity is observed at lower concentrations. It enhances agonist effectiveness at the strychnine-insensitive glycine site. Plays a role in cellular proliferation and differentiation; inhibits neuronal nitric oxide synthase (nNOS).	LOPAC
-0.328583	0.325651	Decylubiquinone	Mitochondrial permeability transition pore (MPTP) inhibitor.	Natural
-0.328583	0.494886	Boldine	an aporphine alkaloid isolated from Boldo tree and other plant species. It is a free radical scavenger with anti-inflammatory activity while exhibiting other pharmacological effects such as antidiabetic, antiplatelet aggregation, antipyretic, antinociceptive, antiatherogenic, hepatoprotective and endothelium-protective activity	Natural
-0.328069	0.601963	Salsolodine	alkaloid	Natural
-0.32805	0.510862	Austricin	sesquiterpene lactone isolated from white wormwood (Artemisia leucodes Schrenk.	Natural
-0.327395	0.521433	Benzamide	Inhibits poly(ADP-ribose) polymerase (PARP).	LOPAC
-0.327233	0.785053	JW55	JW55 is a potent and selective inhibitor of Wnt/ß-catenin signaling.	LOPAC
-0.326779	0.592815	Dienogest	a fourth-generation progestin, an orally active synthetic progestogen with approximately 10% of the relative affinity of progesterone, but has a very potent progestagenic effect in the endometrium with some antiandrogenic activity and without any androgenic, glucocorticoid or mineralocorticoid effects. It has been used alone or in combination as a contraceptive and to treat uterine fibroids. Dien…	FDA
-0.32652	0.719314	3-Tropanyl-indole- 3-carboxylate hydrochloride	hydrochloride salt form of tropisetron, a selective, competitive serotonin 5-hydroxytryptamine type 3 (5-HT3) receptor antagonist, with antinauseant and antiemetic activities. Tropisetron competitively binds to and blocks the action of serotonin at 5HT3 receptors peripherally on vagus nerve terminals located in the gastrointestinal (GI) tract as well as centrally in the chemoreceptor trigger zone…	LOPAC
-0.323828	0.775662	Venlafaxine hydrochloride	Venlafaxine is an antidepressant. The mechanism of the antidepresant action of venlafaxine in humans is associated with its potentiation of neurotransmitter activity in the CNS. Venlafaxine is a potent inhibitor of neuronal serotonin and norepinephrine reuptake and weak inhibitor of dopamine reuptake. Venlafaxine has no significant activity for muscarinic, histaminergic, or α-1 adrenergic recepto…	LOPAC
-0.323827	0.593725	Metolazone	a "water pill" (diuretic) that increases the amount of urine you make, which causes your body to get rid of excess water. This drug is used to treat high blood pressure.	LOPAC
-0.323801	0.390054	8-(p-Sulfophenyl) theophylline	Polar adenosine receptor antagonist, which penetrates cells to a limited extent and is relatively soluble in water.	LOPAC
-0.323408	0.648127	Formoterol fumarate dihydrate	β2-Adrenoreceptor agonist.	LOPAC
-0.322876	0.723816	Rivastigmine Tartrate	Rivastigmine is an orally available, brain penetrant, reversible cholinesterase inhibitor that enhances cognitive function in patients with Alzheimer′s and Parkinson′s diseases. Rivastigmine inhibits both butyrylcholinesterase and acetylcholinesterase.	FDA
-0.322456	0.648291	Pemetrexed Disodium	Folate antimetabolite. It works by inhibiting three enzymes used in purine and pyrimidine synthesis—thymidylate synthase (TS), dihydrofolate reductase (DHFR), and glycinamide ribonucleotide formyltransferase (GARFT). By inhibiting the formation of precursor purine and pyrimidine nucleotides, pemetrexed prevents the formation of DNA and RNA, which are required for the growth and survival of both n…	FDA
-0.322375	0.668877	Verruculogen	Blocker of KCa1.1 (BK) Channels	Natural
-0.322325	0.716978	Nelfinavir Mesylate	the mesylate salt form of nelfinavir, a synthetic antiviral agent that selectively binds to and inhibits human immunodeficiency virus (HIV) protease. Nelfinavir has activity against HIV 1 and 2.	FDA
-0.321177	0.789675	Lamotrigine	Anticonvulsant	LOPAC
-0.321158	0.771969	Famciclovir	Antiviral	LOPAC
-0.320748	0.646595	Oxytetracycline·HCl	the hydrochloride salt form of oxytetracycline, a tetracycline derivative produced by Streptomyces rimosus exhibiting antimicrobial activity. Oxytetracycline hydrochloride interferes with binding of aminoacyl-tRNA to the mRNA-ribosome complex, thereby preventing peptide elongation and inhibiting protein synthesis. It is often used to treat skin conditions.	FDA
-0.319582	0.651023	S-Ethylisothiourea hydrobromide	Inhibitor of inducible human, endothelial and neuronal nitric oxide synthetase isozymes.	LOPAC
-0.319572	0.496491	YM 976	Phosphodiesterase type IV (PDE4) inhibitor. Exhibits anti-inflammatory activity without emesis. PDE4 inhibitors are of interest for asthma.	LOPAC
-0.319022	0.860366	NF 023	NF 023 is a potent, selective P2X1 purinoceptor antagonist.	LOPAC
-0.318203	0.376057	Homoeriodictyol	has a role as a metabolite and a flavouring agent. It is a monomethoxyflavanone, a trihydroxyflavanone, a member of 3'-methoxyflavanones and a member of 4'-hydroxyflavanones. It derives from an eriodictyol.	Natural
-0.318203	0.611854	Indole-3-butyric acid	Indole-3-butyric acid (IBA) is auxin-family plant hormone. IBA is thought to be a precursor of indole-3-acetic acid (IAA) the most abundant and the basic auxin natively occurring and functioning in plants. IAA generates the majority of auxin effects in intact plants, and is the most potent native auxin.	Natural
-0.317576	0.616063	Pentamidine Isethionate	a synthetic amidine derivative, Pentamidine Isethionate is an antiprotozoal and antifungal agent that appears to interact with the minor groove of AT-rich DNA regions of the pathogen genome, interfering with DNA replication and function. It is effective in the treatment of trypanosomiasis, leishmaniasis, some fungal infections, and Pneumocystis carinii pneumonia in HIV-infected patients.	FDA
-0.317563	0.4875	Glycopyrrolate Iodide	A novel pharmaceutical compound based on PDE IV inhibitors; used in the treatment of respiratory complaints.	FDA
-0.317229	0.730812	Rufinamide	Broad-spectrum anticonvulsant.	LOPAC
-0.317135	0.665574	Haloperidol	Haloperidol is a butyrophenone antipsychotic. It is also classified as a neuroleptic (powerful tranquilizer). Haloperidol acts as a D2, D3, and D4 dopamine receptor antagonist and thus causes Parkinson′s disorder. It also has a negative effect on the central nervous system.	LOPAC
-0.316904	0.658655	DL-Thiorphan	Enkephalinase inhibitor.	LOPAC
-0.31665	0.639204	EMPA	EMPA is a potent, selective OX2R antagonist	LOPAC
-0.315778	0.714007	Praziquantel	Praziquantel is in the anthelmintic class of medications.[2] It works partly by affecting the function of the worm's sucker	FDA
-0.315663	0.607804	Dopamine hydrochloride	works as neurotransmitter in the central nervous system.[2] It is a catecholamine made from the amino acid L-tyrosine. It also works as a hormone in vesicles of the adrenal medulla, thereby controlling heart beat rate and blood pressure.	LOPAC
-0.315194	0.328512	Quinidine·HCl·H2O	Class IA antiarrhythmic; potassium channel blocker.	FDA
-0.314066	0.65879	Tranexamic Acid	a synthetic derivative of the amino acid lysine that exerts its antifibrinolytic effect through the reversible blockade of lysine binding sites on plasminogen molecules	FDA
-0.313974	0.45129	TBBz	Cell-permeable casein kinase 2 (CK2) inhibitor.	LOPAC
-0.313793	0.366772	Piperine	an amide isolated from the plant, Piper longum.[2] It is a known inhibitor of hepatic and intestinal glucuronidation.[1] Piperine is found to exhibit pharmacological properties like antitumor, antipyretic and anti-inflammatory activities	Natural
-0.313793	0.66824	Lobeline·HCl	Agonist at high-affinity neuronal nicotinic acetylcholine receptors; respiratory stimulant. Inhibits synaptosomal accumulation of dopamine by interaction with the tetrabenazine binding site of the vesicular monoamine transporter (VMAT2). Blocks amphetamine-induced dopamine release.	Natural
-0.313679	0.79366	ML324	ML324 is a potent JMJD2 demethylase inhibitor that is highly effective in reducing herpes simplex virus (HSV) IE gene expression.	LOPAC
-0.313551	0.652952	6-Hydroxy-DL- DOPA	6-Hydroxy-DL-DOPA is an inhibitor of APE1 (apurinic/apyrimidinic endonuclease) repair-function activity. APE1 is a nuclease crucial for DNA base excision repair pathway.[1] 6-Hydroxy-DL-DOPA also blocks RAD52 (DNA repair protein) single-stranded DNA binding domain	LOPAC
-0.311227	0.625052	Uridine 5'- diphosphate sodium salt	Uridine 5′-diphosphate (UDP) and Uridine 5′-triphosphate (UTP) may be used in studies on nucleic acid (RNA) biosynthesis and cell signaling. UDP is a nucleotide that upon phosphorylation to UTP becomes a substrate for enzymes such as RNA polymerase(s) and GTPases. These enzymes are involved in a wide range of applications from the synthesis of RNA to the regulation of G-coupled Protein Receptors …	LOPAC
-0.310107	0.688613	Trimethoprim	The combination of trimethoprim and sulfamethoxazole interferes with the cellular metabolism of folic acid in the bacterial cell by blocking the biosynthesis of nucleotides. Trimethoprim binds to dihydrofolate reductase and inhibits the reduction of dihydrofolic acid (DHF) to tetrahydrofolic acid (THF). THF is an essential precursor in the thymidine synthesis pathway and interference with this pa…	LOPAC
-0.309926	0.42923	Hernandezine	a novel AMPK activator, can inhibit LPS-induced TNFα expression/production in human macrophage cells (THP-1 and U937 lines). 2. Hernandezine is a potent and selective reversing agent for ABCB1-mediated MDR in cancer cells. 3. Hernandezine inhibits calcium-depletion stimulated calcium entry in human and bovine endothelial cells. 4. Hernandezine induces autophagic cell death in drug-resistant cance…	Natural
-0.309307	0.515249	Cefdinir	3rd Generation cefalosporin. Bacterial cell-wall synthesis inhibitor.	FDA
-0.30915	0.65757	Bupivacaine·HCl	Sodium channel blocker, local anesthetic	FDA
-0.309114	0.649551	Acyclovir (Acycloguanosine) Zovirax	Antiviral agent. Phosphorylation by herpes simplex virus thymidine kinase (HSV-TK) leads to the formation of acycloguanosine triphosphate that competitively inhibits the viral DNA polymerase.	FDA
-0.308264	0.71873	Nystatin	Nystatin exerts its antifungal activity by binding to ergosterol found in fungal cell membranes. Binding to ergosterol causes the formation of pores in the membrane. Potassium and other cellular constituents leak from the pores causing cell death.	FDA
-0.3074	0.767519	3-MFA	3-MFA is a mefenamic acid analog that blocks the transient receptor potential melastatin 2 (TRPM2) channel. Unlike other TRPM2 blockers such as 2-APB and flufenamic acid, 2-APB does not induce release of calcium from intracellular stores.	LOPAC
-0.307343	0.792742	CyPPA	CyPPA is a positive modulator of small conductance Ca2+-activated K+ channels; selective for SK3 and SK2. CyPPA is a first subtype selective SK channel positive modulator with an EC50 of 5.6 μM and 14 μM, efficacy 90% and 71% for hSK3 and hSK2, respectively. CyPPA is a tool for distinguishing SK2 and SK3 from SK1 and IK; no other agents distinguish these channels.	LOPAC
-0.306968	0.873387	Nicardipine·HCl	Blocks L-type voltage-dependent calcium channels; antihypertensive.	FDA
-0.30631	0.835347	SB-334867	SB-334867 is a non-peptide selective antagonist of the orexin OX1 receptor.	LOPAC
-0.305872	0.433838	Eudesmine	Found in the Rutaceae family that has estrogenic and sedative effects.	Natural
-0.305337	0.679399	Oseltamivir Phosphate	Tamiflu - inhibits the neuraminidase enzyme, which is expressed on the viral surface. The enzyme promotes release of virus from infected cells and facilitates viral movement within the respiratory tract.	FDA
-0.304492	0.677776	(-)-JQ1	a high affinity, potent and selective inhibitor of BET bromodomain proteins, including BRD2, BRD3, BRD4 and BRDT.	LOPAC
-0.304446	0.793469	Oxybutynin Chloride	Muscarinic acetylcholine receptor antagonist; inhibits proliferation of bladder smooth muscle cells, perhaps by downregulation of growth promoting genes.	LOPAC
-0.304324	0.813404	(S)-(-)-Perillic acid	Interferes with activity of p21ras and other small G proteins by inhibiting post-translational cysteine isoprenylation.	LOPAC
-0.304114	0.655225	DL-Cycloserine	Inhibitor of alanine aminotransferase and other pyridoxal-phosphate-requiring transaminases; blocks sphingosine biosynthesis by inhibition of ketosphinganine synthetase.	LOPAC
-0.303542	0.76307	Moxisylyte hydrochloride	An alpha-adrenergic blocking agent that is used in Raynaud's disease. It is also used locally in the eye to reverse the mydriasis caused by phenylephrine and other sympathomimetic agents.	LOPAC
-0.30349	0.563506	Rutin	A polyphenolic flavonoid that acts as an antioxidant and NO scavenger. It can attenuate peroxide production in glial cells by acting as a free radical scavenger and protect renal cells from oxidative injury. Inclusion of rutin in the diet of rats significantly reduced the appearance of single-strand breaks in nuclear DNA caused by hepatocarcinogens aflatoxin B1 and N-nitrosodiumethylamine. This p…	Natural
-0.301928	0.61727	Retinoic acid p- hydroxyanilide	Vitamin A acid analogue with antiproliferative activity in cultured human breast cancer cells; induces apoptosis in malignant hemopoietic cell lines.	LOPAC
-0.3019	0.433759	Eriodictyol-7-O-glucoside	Flavonoid which exhibits antioxidant activities, potent free radical scavenger[	Natural
-0.3019	0.547076	Dehydrocostus lactone	Suppressors of cytokine signaling (SOCS) proteins negatively regulate cytokine receptor signaling. The SOCS family include eight members SOCS-1 to SOCS-7 and CIS. Dehydrocostuslactone (DHE) is a sesquiterpene lactone extracted from Saussurea lappa and Aucklandia lappa. The compound possess antifungal and antimycobacterial activity and exhibit a cytotoxic effect against HepG2, OVCAR-3, and HeLa ce…	Natural
-0.301644	0.490798	Harmalol·HCl·2H2O	Harmalol, a harmala (β-carboline) alkaloid, is a monoamine oxidase inhibitor (MAOi) useful for studies involving melanogenesis. Harmalol is use in β-carboline nucleic acid (DNA and RNA) binding studies.	Natural
-0.301644	0.672699	Trigonelline·HCl	a pyridine derivative known to contribute indirectly to the formation of desirable flavor products, including furans, pyrazine, alkyl-pyridines, and pyrroles, during coffee roasting. In addition, the urinary concentrations of trigonelline and its thermal product N-methylpyridinium of coffee drinkers are higher than those of noncoffee drinkers, which indicates that trigonelline and N-methylpyridin…	Natural
-0.301401	0.259381	Pinocembrin	a major flavonoid molecule, isolated from a variety of plants such as Euphorbia, Sparattosperma leucanthum, Populus, Eucalyptus, Pinus heartwood, etc. It exhibits antitumor, antimicrobial, anti-inflammatory and antioxidant properties	Natural
-0.300903	0.718092	Procarbazine·HCl	the hydrochloride salt of a methylhydrazine derivative with antineoplastic and mutagenic activities. Although the exact mode of cytotoxicity has not been elucidated, procarbazine, after metabolic activation, appears to inhibit the trans-methylation of methionine into transfer RNA (t-RNA), thereby preventing protein synthesis and consequently DNA and RNA synthesis. This agent may also undergo auto…	FDA
-0.300546	0.660311	TDFA trifluoroacetate salt	Inhibitor of serine and cysteine proteases. Inhibits plasmin, trypsin, papain, calpain, and cathepsin B. Does not inhibit pepsin, cathepsins A and D, thrombin, or α-chymotrypsin. Effective concentration 10-100 μM. There have been numerous studies using leupeptin to protect against hearing loss caused by acoustic overstimulation or the ototoxic antibiotic gentamicin. (Loss of cochlear hair cells i…	LOPAC
-0.300486	0.244609	Grayanotoxin III	The toxicity of grayanotoxin is derived from its ability to interfere with voltage-gated sodium channels located in the cell membrane of neurons. The Nav1.x channels consist of four homologous domains (I-IV), each containing six transmembrane alpha-helical segments (S1-S6). Grayanotoxin has a binding affinity (IC50) of approximately 10 μM and binds the group II receptor site located on segment 6 …	Natural
-0.300365	0.736707	Bumetanide	a loop diuretic and works by decreasing the reabsorption of sodium by the kidneys. The main difference between bumetanide and furosemide is in their bioavailability and potency. About 60% of furosemide is absorbed in the intestine, and there are substantial inter- and intraindividual differences in bioavailability (range 10-90%). About 80% of bumetanide is absorbed, and its absorption does not ch…	FDA
-0.299331	0.734753	RepSox	RepSox is a cell permeable, selective inhibitor of the TGF-β type 1 receptor	LOPAC
-0.299072	0.814636	Debrisoquin sulfate	An adrenergic neuron-blocking drug similar in effects to guanethidine. It is also noteworthy in being a substrate for a polymorphic cytochrome P-450 enzyme	LOPAC
-0.298934	0.780647	Erlotinib	Erlotinib is a quinazoline derivative with antineoplastic properties. Competing with adenosine triphosphate, erlotinib reversibly binds to the intracellular catalytic domain of epidermal growth factor receptor (EGFR) tyrosine kinase, thereby reversibly inhibiting EGFR phosphorylation and blocking the signal transduction events and tumorigenic effects associated with EGFR activation.	FDA
-0.297439	0.683115	Ro 11-1464	Ro 11-1464 induces the hepatic expression of apoA-1	LOPAC
-0.295961	0.653465	Phloretin	Phloretin is known to decrease interfacial dipole potential of lipid bilayer.[2] Phloretin possess antitumor action by preventing protein kinase C (PKC) activity and stimulating programmed cell death.[3] It is found to inhibit the transport functions of GLUTs (glucose transporter) and aquaporins	LOPAC
-0.295379	0.867341	Carbachol (Carbamylcholine ) Chloride	Non-selective cholinergic agonist that is resistant to the action of cholinesterases; inhibits apoptotic death of cultured neurons	FDA
-0.294516	0.639132	Orlistat (Tetrahydrolipstatin)	Orlistat, used in obesity research, is a pancreatic lipase inhibitor that acts locally in the gastrointestinal tract to inhibit lipase.	FDA
-0.294494	0.654074	AMG 9810	AMG 9810 is the cinnamide TRPV1 (vanilloid receptor 1) antagonist	LOPAC
-0.294186	0.57622	Glybenclamide	Selectively blocks ATP-sensitive K+ channels; high affinity binding sites found in brain, pancreatic β cells, and cardiovascular system	LOPAC
-0.292547	0.575296	Carbetapentane citrate	High affinity σ1 agonist; ORL1 antagonist; antitussive	LOPAC
-0.291885	0.466506	(±)-Atenolol	Atenolol is a selective β1 receptor antagonist	LOPAC
-0.291374	0.637992	KU-55933	KU-55933 is a specific inhibitor of ATM kinase	LOPAC
-0.290862	0.365372	(-)-Nicotine	agonist at nicotinic cholinergic receptors	Natural
-0.290528	0.641715	Dimenhydrinate	Dimenhydrinate, a diphenhydramine salt of 8-chlorotheophylline, exhibits antihistaminic activity, with antimuscarinic and sedative effects	FDA
-0.290275	0.704116	Melatonin	Melatonin is a derivative of tryptophan. It binds to melatonin receptor type 1A, which then acts on adenylate cylcase and the inhibition of a cAMP signal transduction pathway	LOPAC
-0.290153	0.556581	Balsalazide	Balsalazide has antioxidative and anti-inflammatory properties. It inhibits superoxide production and was found to scavenge hypochlorite radicals.	FDA
-0.288702	0.651023	Emodin	Inhibitor of NF-κB activation and adhesion molecule expression. Casein Kinase 2 (CK2) inhibitor.	LOPAC
-0.288314	0.819468	Phenytoin sodium	Phenytoin sodium promotes sodium efflux from neurons located in the motor cortex, thereby stabilizing the neuron and inhibiting synaptic transmission	LOPAC
-0.285954	0.263306	Strophantidin	Strophanthidin is a cardiotonic steroid that elevates the activity of Na+/K+-ATPase	Natural
-0.285954	0.666667	Homatropine·HBr	a competitive inhibitor of acetylcholine at the muscarinic receptor, blocks parasympathetic nerve stimulation	Natural
-0.285452	0.442754	Ancitabine hydrochloride	Ancitabine Hydrochloride is the hydrochloride salt of a cytarabine congener prodrug with antineoplastic activity. Upon administration, ancitabine is slowly hydrolyzed into cytarabine. Subsequently, cytarabine is converted to the triphosphate form within the cell and then competes with cytidine for incorporation into DNA. Because the arabinose sugar sterically hinders the rotation of the molecule …	LOPAC
-0.284982	0.626252	(±)- Vanillylmandelic acid	Epinephrine and norepineprine metabolite	LOPAC
-0.282354	0.833407	Moclobemide	A reversible monoamine oxidase inhibitor (MAOI) selective for isoform A (RIMA)	LOPAC
-0.281202	0.684783	GSK2801	GSK2801 is a potent inhibitor of the BAZ2 family of bromodomain containing proteins. BAZ2A is an essential component of the nucleolar remodeling complex (NoRC), which mediates recruitment of histone modifying enzymes and DNA methylase involved in the silencing of ribosomal RNA transcription. BAZ2B is believed to be involved in regulating nucleosome mobilization along linear DNA	Epigenetic
-0.281044	0.658448	Cyproterone acetate	Cyproterone acetate is a synthetic steroid and an androgen antagonist.	LOPAC
-0.281025	0.647454	Hydrocotarnine HBr	a non-narcotic opium alkaloid	Natural
-0.280935	0.637903	Guanabenz acetate	Centrally acting α2 adrenoceptor agonist; I2 imidazoline binding site ligand; antihypertensive.	LOPAC
-0.280581	0.209719	Bromocriptine mesylate	an ergot derivative with potent dopamine receptor agonist activity	Natural
-0.28025	0.646201	Chlorzoxazone	The precise mechanism of action has not been determined. Chlorzoxazone acts in the central nervous system (CNS) rather than directly on skeletal muscle. It acts primarily at the spinal cord level and at subcortical areas of the brain and preferentially depresses polysynaptic reflexes. {05} The muscle relaxing effects may also be related to chlorzoxazone's CNS depressant (sedative) effects	LOPAC
-0.27867	0.691971	THIP hydrochloride	Systemically active GABAA receptor agonist and GABAA-ρ receptor antagonist	LOPAC
-0.27852	0.408822	Quercetin·2H2O	Quercetin is a mitochondrial ATPase and phosphodiesterase inhibitor. It Inhibits PI3-kinase activity and slightly inhibits PIP kinase activity	Natural
-0.278112	0.278302	Apigenin	Inhibits PMA-mediated tumor promotion by inhibiting protein kinase C. It has also been reported to inhibit topoisomerase I-catalyzed DNA re-ligation and enhance gap junctional intercellular communication. It is a potent inhibitor of the cluster of differentiation 38 (CD30) nucleotide adenine dinucleotide (NAD+) nucleosidase.	Natural
-0.277829	0.650039	6-Hydroxy melatonin	Melatonin metabolite with agonist activity	LOPAC
-0.276133	0.70228	Cephradine	Cefradin is a semi-synthetic cephalosporin that inhibits the last stage of bacterial cell wall synthesis by binding to certain penicillin-binding proteins (PBPs), such as PBP3, which results in cell lysis. Cell lysis is mediated by bacterial cell wall autolytic enzymes. It is effective against Gram-positive and Gram-negative bacteria. Cefradin may also interfere with autolysin inhibitors.	LOPAC
-0.276083	0.238315	Sevedindione	Sevedindione is an antiarrhythmic, belonging to a novel structural class of antiarrhythmics	Natural
-0.275553	0.69077	Didanosine	Didanosine in converted to dideoxyadenosine-triphosphate (ddATP), which competes with endogenous nucleotides for incorporation into the viral DNA and once incorporated causes chain termination due to the lack of a 3’ OH group	FDA
-0.275315	0.245868	Pralidoxime Chloride	The principal action of pralidoxime chloride is to reactivate cholinesterase which has been inactivated by phosphorylation	FDA
-0.274669	0.66103	CIQ	CIQ is positive allosteric modulator of NR2C/NR2D subunit containing NMDA receptors. CIQ increases channel opening frequency of recombinant NR2Cor NR2D containing receptors	LOPAC
-0.274601	0.718038	SNC80	SNC80 is a highly selective agonist of δ opioid receptor but also binds to μ-δ opioid receptor heteromers to produce antinociception	LOPAC
-0.27352	0.656713	Ara-G hydrate	Ara-G is an inducer of apoptosis; inhibitor of DNA synthesis; antineoplastic; and antimetabolite. Ara-G is converted by cellular kinases to the active 5′-triphosphate, Ara-GTP. Incorporation of Ara-GTP into DNA leads to inhibition of DNA synthesis and apoptosis.	LOPAC
-0.272224	0.748949	XL388	XL388 is a highly potent, selective, ATP-competitive inhibitor of mTOR	LOPAC
-0.270638	0.276854	Doxorubicin	Substrate of MRP1; used for measurement of drug efflux pump activities. Doxorubicin hydrochloride (DOX) inhibits topoisomerase II by intercalating between base pairs and by inducing strand breaks, resulting in the inhibition of nucleic acid and protein synthesis.[1] It also contributes to the formation of free radicals for the disruption of membrane lipids and DNA strands.	Natural
-0.270024	0.776189	Tolbutamide	Anti-diabetic agent. Metabolized by CYP2C9 (tolbutamide hydroxylase).	FDA
-0.269965	0.589263	Perindopril Erbumine	Perindopril erbumine is an angiotensin converting enzyme (ACE) inhibitor; antihypertensive; becomes hydrolyzed in vivo to the active diacid metabolite; unlike the other ACE inhibitors, inhibits tumor growth in hepatocellular carcinoma cells due to suppression of VEGF levels; also suppresses angiotensin II production	FDA
-0.269901	0.611274	Azomycin	Azomycin (2-Nitroimidazole) is a natural antimicrobial antibiotic produced by a strain of Nocardia mesenterica, that have been used to combat anaerobic bacterial and parasitic infections. Azomycin and other 2’-nitroimidazoles show anti-ischemic and anti-inflammatory pharmacological properties. Azomycin is cytotoxic and change drug-metabolizing cytochrome P450, NADPH dependent reductase enzymes an…	Natural
-0.269806	0.590628	Biochanin A	Biochanin A is an isoflavone phytoestrogen found in red clover (Trifolium pratense) that is a selective agonist at ER-β estrogen receptors,	Natural
-0.269474	0.597534	GR 79236X	A1 adenosine receptor agonist	LOPAC
-0.268218	0.427255	Heliotrine	Heliotrine iS a monoester pyrrolizidine alkaloid that can be found in the seeds of Heliotropium indicum	Natural
-0.268066	0.726363	Oseltamivir phosphate	Oseltamivir phosphate is hydrolyzed in the liver to its active form, oseltamivir carboxylate, which is an inhibitor of influenza viral neuraminidases essential for viral replication. Oseltamivir has a broad spectrum of activity against a range of influenza A and B subtypes	LOPAC
-0.267667	0.647386	Dapiprazole hydrochloride	Dapiprazole hydrochloride is an an α-adrenergic blocking agent	LOPAC
-0.267437	0.664456	Tranilast	inhibits vascular smooth muscle cell proliferation by inhibiting the cyclin-dependent kinase inhibitor-1(p21Waf1/Cip1). Tranilast is an anti-asthma drug, which inhibits LTC4 and PGE2 formation in stimulated monocytes, but does not inhibit cyclooxygenase or lipoxygenase activity; inhibits mast cell degranulation; inhibits VEGF-induced angiogenesis in vivo and also inhibits proliferation and tube f…	LOPAC
-0.267356	0.371212	Tadalafil	Tadalafil is a potent, selective inhibitor of cGMP specific phosphodiesterase type 5 (PDE5)	FDA
-0.267339	0.692637	Theophylline	Theophylline is a tea alkaloid that functions as a nonselective PDE4 inhibitor	LOPAC
-0.267098	0.747959	DL-alpha- Difluoromethyl ornithine HCl	DL-α-Difluoromethylornithine hydrochloride inhibits polyamine biosynthesis by selective, irreversible inhibition of ornithine decarboxylase (ODC)	LOPAC
-0.267047	0.37741	Testosterone Enanthate	Testosterone enanthate is a testosterone ester	FDA
-0.266939	0.567237	Decitabine	causes DNA demethylation or hemi-demethylation	FDA
-0.266163	0.616555	1- Aminocyclopropanec arboxylic acid Hydrochloride	NMDA agonist acting at the glycine site	LOPAC
-0.265213	0.57739	Methenamine Hippurate	Methenamine Hippurate is the hippurate salt form of methenamine, a prodrug and inactive weak base that slowly hydrolyzes in acidic urine to ammonia and the effective, urinary tract antiseptic formaldehyde	FDA
-0.264916	0.577428	SU 4312	SU 4312 inhibits the neuronal NOS and exhibits neuroprotection against NO-mediated neurotoxicity. SU 4312 is a vascular endothelial growth factor (VEGF) receptor protein tyrosine kinase 1/2 and platelet derived growth factor (PDGF) receptor inhibitor.	LOPAC
-0.261812	0.725204	(±)-SKF-38393 hydrochloride	The selective D1-R agonist SKF-38393 (hydrochloride) induces a similar change in cytomorphology and increased the levels of media cAMP	LOPAC
-0.260399	0.749795	Exemestane	Exemestane is a steroidal antiestrogen and irreversible aromatase inhibitor. Exemestane acts as a false substrate for the aromatase enzyme. Exemestane also prevents the conversion of androgens to estrogens and is used to treat estrogen-dependent breast cancer.	FDA
-0.260392	0.617216	Levetiracetam	Levetiracetam is a pyrrolidine with antiepileptic activity. Stereoselective binding of levetiracetam was confined to synaptic plasma membranes in the central nervous system with no binding occurring in peripheral tissue. Levetiracetam inhibits burst firing without affecting normal neuronal excitability, which suggests that it may selectively prevent hyper-synchronization of epileptiform burst fir…	FDA
-0.260368	0.79358	8-Cyclopentyl-1,3- dipropylxanthine	Selective A1 adenosine receptor antagonist.	LOPAC
-0.258899	0.625896	D-Cycloserine	Inhibits cell wall biosynthesis (D-Ala peptide bond formation). Also prevents conversion of D-Ala to L-Ala. Bacteriostatic. Partial agonist at the glycine modulatory site of NMDA glutamatergic receptors; antibiotic against Gram-negative bacteria.	LOPAC
-0.258492	0.771587	AS605240	AS-605240 is a specific and orally active inhibitor of the PI3Kγ	LOPAC
-0.258163	0.528892	Cefotetan Disodium	Cefotetan (cefotan) is a second-generation cephalosporin that is active against some strains of β-lactamase producing bacteria. Cefotetan binds to penicillin-binding proteins and disrupts the cell wall synthesis.	FDA
-0.255014	0.84044	7-Nitroindazole	Selective inhibitor of nitric oxide synthase from mouse brain	LOPAC
-0.254228	0.595449	Dicloxacillin·Na Salt Monohydrate	Docloxacillin binds to specific penicillin-binding proteins (PBPs) in the bacterial cell wall and therefore inhibits the last stage of bacterial cell wall synthesis.	FDA
-0.253708	0.819446	Tizanidine·HCl	α2-adrenoceptor agonist. Tizanidine hydrochloride is known to function as a skeletal muscle relaxant that acts centrally. Furthermore, this relaxant functions at spinal and supraspinal levels to block excitatory interneurons.	FDA
-0.252618	0.737542	LY-294,002 hydrochloride	Specific cell permeable phosphatidylinositol 3-kinase inhibitor.	LOPAC
-0.252356	0.593944	Desvenlafaxine Succinate Hydrate	5-HT and NE reuptake inhibitor	FDA
-0.251892	0.666729	Oxiconazole Nitrate	Oxiconazole is a broad-spectrum antifungal agent that inhibits ergosterol biosynthesis. Oxiconazole destabilizes Lanosterol 14-α demethylase	FDA
-0.24988	0.391185	Pyridostigmine Bromide	Acetylcholinesterase inhibitor	FDA
-0.247191	0.416533	Atorvastatin Calcium	specific inhibitor of HMG-CoA reductase	FDA
-0.246276	0.633048	BAY-678	highly potent and selective inhibitor of human neutrophil elastase (HNE)	LOPAC
-0.246215	0.735073	Ofloxacin	Ofloxacin inhibits bacterial DNA gyrase and topoisomerase IV, which haults DNA replication and cell division. Ofloxacin has been shown to convert LytA from the inactive E-form to the active C-form	FDA
-0.245882	0.539402	Drospirenone	fourth-generation progestin that has antimineralocorticoid, and antiandrogenic activity in addition to potent progestogenic activity	FDA
-0.245747	0.770253	Loxapine succinate	D2/D4 dopamine receptor antagonist; 5-HT2A/2B, 5-H7 serotonin receptor antagonist; dibenzoxazepine antipsychotic agent	LOPAC
-0.245125	0.870897	AZ191	potent and selective inhibitor of DYRK1B that promotes a G1 cell cycle arrest	LOPAC
-0.243928	0.419811	Neomycin	aminoglycoside antibiotic	Natural
-0.241604	0.327824	Regadenoson	A2A adenosine receptor agonist	FDA
-0.241374	0.698076	Esomeprazole magnesium dihydrate	a leading proton pump inhibitor	LOPAC
-0.24121	0.520465	Baclofen	GABAB receptor agonist; skeletal muscle relaxant; antispastic agent.	FDA
-0.240806	0.376722	Pyrimethamine	a diaminopyrimidine that acts as a folic acid antagonist	FDA
-0.240161	0.554195	Myristicin	induces the expression of glutathione S-transferase and cytochrome P450 (Cyp1a-1)	Natural
-0.240152	0.457039	Mitomycin C	an alkylating agent that specifically targets the guanine nucleoside sequence 5′-CpG-3′. It inhibits DNA synthesis by covalently reacting with DNA, forming crosslinks between complementary strands of DNA. This interaction prevents separation of complementary DNA strands, inhibiting DNA replication	Natural
-0.239872	0.67407	Claramine trifluoroacetate salt	a protein tyrosine phosphatase 1B (PTP1B) inhibitor, an analog of Trodusquemine	LOPAC
-0.239628	0.59503	Methylergonovine Maleate	Ergot alkaloid which interacts with serotonergic, dopaminergic and α-adrenergic systems. Dopamine antagonist	FDA
-0.239584	0.664572	Lumefantrine	an antimalarial for the treatment of multi-drug resistant strains of falciparum malaria	LOPAC
-0.238496	0.653677	Epalrestat	inhibits Aldose Reductase (AR) involved in the rate limiting step in the conversion of glucose to sorbitol under hyperglycemic conditions	LOPAC
-0.23835	0.631785	Pamidronate Disodium Pentahydrate (Pamidronic Acid)	Bone resorption inhibitor; inhibitor of farnesyl diphosphate synthase	FDA
-0.238195	0.669905	Thioridazine hydrochloride	D2 dopamine receptor antagonist; phenothazine antipsychotic with reduced extrapyramidal side effects; Ca2+ channel blocker	LOPAC
-0.237169	0.551619	L-Arginine	a non-essential amino acid	LOPAC
-0.236944	0.629893	Hexamethonium bromide	Preferentially blocks nicotinic receptors at autonomic ganglia; crosses blood-brain barrier only at high doses	LOPAC
-0.236452	0.650956	Remodelin hydrobromide	an inhibitor of N-acetyltransferase 10 (NAT10)	LOPAC
-0.23559	0.374656	Sulfanilamide	A competitive inhibitor of dihydropteroate synthestase to block the synthesis of folic acid	FDA
-0.235588	0.471363	Pilocarpine	Nonselective muscarinic acetylcholine receptor agonist	Natural
-0.234135	0.661277	Ergotamine Tartrate	binds to alpha-adrenergic receptors. Also blocks serotonin 5-HT1D receptors	FDA
-0.232923	0.387466	Piceatannol	an analog of resveratrol that possess potential anti-oxidant,[3] anti-cancer and anti-inflammatory properties; interferes with the cytokine signaling pathway; also inhibits the activation of NFκB	Natural
-0.23268	0.728172	2,2'-Bipyridyl	Metalloprotease inhibitor, high-affinity chelator of iron	LOPAC
-0.232485	0.855678	T0070907	T0070907 is very similar in structure and activity to the PPAR-γ antagonist GW9662. T0070907 is more potent and has higher selectivity for PPAR-γ over all other subtypes (about 800-fold) whereas GW9662 has been reported to have some PPAR-α agonist activity	LOPAC
-0.232412	0.974867	Paromomycin sulfate	Paromomycin inhibits the initiation and elongation steps of protein synthesis by binding to 16S ribosomal RNA. Paramomycin binds to the A site, which causes defective polypeptide chains to be produced	LOPAC
-0.232095	0.783569	Capsazepine	Capsazepine is a specific vanilloid receptor antagonist; synthetic analog of capsaicin	LOPAC
-0.231957	0.338875	Degeulin	Inhibitor of activated Akt. Does not affect MAPK, ERK1/2, or JNK.	Natural
-0.230731	0.762514	Buclizine dihydrochloride	a piperazine antihistamine and anticholinergic that exerts its antiemetic and antimotion sickness effects	LOPAC
-0.230399	0.623997	Bimatoprost	Potent FP prostanoid receptor agonist	FDA
-0.229878	0.849833	Lorglumide sodium	Potent and selective non-peptide cholecystokinin (CCKA) receptor antagonist	LOPAC
-0.228706	0.84087	Rosuvastatin calcium	Rosuvastatin calcium is a competitive inhibitor of hydroxymethylglutaryl-coenzyme A (HMG-CoA) reductase, the enzyme that catalyzes the conversion of HMG-CoA to mevalonic acid, the rate-limiting step in cholesterol biosynthesis	LOPAC
-0.227655	0.602493	Nitrofurantoin	antibactericidal compound; inhibitor of glutathione reductase	FDA
-0.227584	0.751257	6,7-ADTN hydrobromide	Dopamine D1 agonist	LOPAC
-0.22505	0.904798	Pergolide methanesulfonate	Dopaminergic agonist; suppresses pituitary secretion of prolactin	LOPAC
-0.224439	0.756204	3,7-Dimethyl-1- propargylxanthine	Selective A2 adenosine receptor antagonist	LOPAC
-0.224068	0.772233	Captopril	Angiotensin converting enzyme inhibitor.	FDA
-0.223647	0.379156	C6 Ceramide	involved in inhibiting proliferation and inducing apoptosis	Natural
-0.223021	0.814981	Diacylglycerol Kinase Inhibitor II	Diacylglycerol kinase inhibitor.	LOPAC
-0.222302	0.556357	Metyrapone	a glucocorticoid synthesis inhibitor; also inhibits cytochrome P450-mediated prostaglandin ω/ω-1 hydroxylase activity	FDA
-0.22027	0.645928	Nabumetone	Nonselective non-steroidal anti-inflammatory drug (NSAID)	FDA
-0.21933	0.643281	CCT007093	an effective PPM1D inhibitor	LOPAC
-0.218029	0.674157	Metoprolol Tartrate	β1-adrenoceptor antagonist.	FDA
-0.217771	0.920733	Norcantharidin	blocks SK-N-SH neuroblastoma cell growth by stimulating autophagy and apoptosis	LOPAC
-0.216777	0.808587	Isonipecotic acid	GABAA receptor partial agonist.	LOPAC
-0.216464	0.62937	Tyrphostin 51	a selective inhibitor of the epidermal growth factor receptor (EGFR) tyrosine kinase	LOPAC
-0.21564	0.853726	Linopirdine	Stimulates release of acetylcholine and other neurotransmitters; cognitive enhancer.	LOPAC
-0.215583	0.635999	1-[2- (Trifluoromethyl)ph enyl]imidazole	Potent nitric oxide synthase inhibitor.	LOPAC
-0.215582	0.77529	Propafenone hydrochloride	Blocks hKv1.5 and ATP-sensitive K+ channels; class 1C antiarrhythmic agent that is also an antagonist at β adrenergic receptors.	LOPAC
-0.215552	0.636276	SQ 22536	adenylyl cyclase inhibitor	LOPAC
-0.21546	0.451531	Mestranol	Pharmacological estrogen molecule	FDA
-0.215229	0.602647	Imipenem	a broad spectrum B-lactam antibiotic	FDA
-0.214855	0.263774	Trientine Dihydrochloride	a histamine H1-receptor antagonist	FDA
-0.214396	0.60385	Permethrin	a pyrethroid insecticide	FDA
-0.21284	0.651981	Valganciclovir hydrochloride hydrate	an antiviral used to treat cytomegalovirus infection. It is the prodrug of ganciclovir, a synthetic analog of 2′-deoxy-guanosine which is phosphorylated to a dGTP analog that competitively inhibits the incorporation of dGTP by viral DNA polymerase.	LOPAC
-0.212681	0.654994	Dihydrotanshinone	a naturally occurring compound extracted from Salvia miltiorrhiza Bunge, has been reported to have cytotoxicity to a variety of tumor cells	Natural
-0.21266	0.62431	DL-threo-beta- Hydroxyaspartic acid	a glutamate uptake inhibitor	LOPAC
-0.211456	0.399449	Reserpine	Inhibits vesicular uptake of catecholamines and serotonin	FDA
-0.211138	0.472227	Ajmaline	reversibly blocks hERG	Natural
-0.211138	0.691319	Kinetin	an adenine-type cytokinin phytohormone	Natural
-0.210633	0.547222	GSK-650394	GSK-650394 is a potent and selective Serum- and glucocorticoid-regulated kinase 1 (SGK1) antagonist	LOPAC
-0.210447	0.364987	Topotecan·HCl	selectively stabilizes topoisomerase I-DNA covalent complexes, inhibiting religation of topoisomerase I-mediated single-strand DNA breaks and producing potentially lethal double-strand DNA breaks	FDA
-0.208293	0.644589	Cinoxacin	a synthetic antimicrobial agent that interferes with DNA replication by inhibiting DNA gyrase and topoisomerase IV (topo IV) through tight DNA binding	LOPAC
-0.207928	0.436639	Rasagiline Mesylate	an irreversible inhibitor of monoamine oxidase selective for MAO type B	FDA
-0.20714	0.523676	Arsenic Trioxide	potent agent against acute promyelocytic leukemia (APL)	FDA
-0.207064	0.670384	WAY-100635 maleate	selective 5-HT1A serotonin receptor antagonist	LOPAC
-0.205499	0.654651	Iodoacetamide	By virtue of reaction with cysteine, it is an irreversible inhibitor of enzymes with cysteine at the active site. It reacts much more slowly with histidine residues, but that activity is responsible for inhibition of ribonuclease.	LOPAC
-0.20501	0.614616	L-798106	an EP3-selective agonist	LOPAC
-0.204637	0.637903	Hydroxyurea	Inactivates ribonucleoside reductase by forming a free radical nitroxide that binds a tyrosyl free radical in the active site of the enzyme. This blocks the synthesis of deoxynucleotides, which inhibits DNA synthesis and induces synchronization or cell death in S-phase.	LOPAC
-0.203884	0.560793	Cantharidic Acid	Inhibits protein phosphatase 2A	LOPAC
-0.202762	0.669084	Canrenone	aldosterone antagonist with potassium-sparing diuretic activity	LOPAC
-0.20225	0.664249	Cefazolin sodium salt	broad-spectrum cephalosporin antibiotic	LOPAC
-0.202134	0.671937	Minoxidil	Activates ATP-activated K+ channels	FDA
-0.199276	0.897944	S(-)-3PPP hydrochloride	Dopamine autoreceptor agonist; postsynaptic dopamine receptor antagonist	LOPAC
-0.19882	0.659737	ML277	ML277 is a potent activator of KCNQ1 (Kv7.1) channels with >100-fold selectivity versus KCNQ2 and KCNQ4 and no activity against the hERG potassium channel up to 30 μM	LOPAC
-0.198663	0.855713	Tocainide hydrochloride	a sodium channel blocker; Class IB antiarrhythmic	LOPAC
-0.197674	0.707906	7,8- Dihydroxyflavone hydrate	selective tyrosine kinase receptor B (TrkB) receptor agonist	LOPAC
-0.196192	0.726037	RX 821002 hydrochloride	Selective α2-adrenoceptor antagonist	LOPAC
-0.196096	0.566212	Bacitracin	Inhibits bacterial cell wall synthesis by inhibiting dephosphorylation of lipid pyrophosphate.	FDA
-0.195715	0.649746	Calmidazolium chloride	Inhibitor of calmodulin-regulated enzymes. It is also believed to directly block calcium channels in smooth muscle cells	LOPAC
-0.194943	0.64834	Efinaconazole	triazole antifungal drug; inhibits sterol biosynthesis by inhibition of cytochrome P450 14α-demethylase	LOPAC
-0.194918	0.659016	Sclerotiorin	aldose reductase inhibitor	Natural
-0.193433	0.885357	Acitretin	Synthetic retinoid that is a metabolite of etretinate. Preferentially binds to cellular retinoic acid binding proteins (CRABPs)	FDA
-0.193332	0.501021	AS-252424	potent and selective phosphoinositide 3-kinase PI3Kγ inhibitor	LOPAC
-0.193141	0.658261	S-(+)-Fluoxetine hydrochloride	Selective serotonin reuptake inhibitor; antidepressant	LOPAC
-0.192934	0.751137	Ranolazine·2HCl	Ranolazine 2HCl is a calcium uptake inhibitor via the sodium/calcium channal	FDA
-0.192685	0.774954	Promethazine hydrochloride	H1 histamine receptor antagonist; CNS depressant; anticholinergic	LOPAC
-0.191391	0.681586	Omeprazole	binds covalently to proton pump (H+, K+-ATPase) and inhibits gastric secretion; Omeprazole is preferred over antagonists of histamine H2-receptor and ranitidine for its higher efficiency	FDA
-0.19034	0.459063	Scopoletin	peroxynitrite scavenger; acetylcholinesterase inhibitor.	Natural
-0.190279	0.65609	Efaroxan hydrochloride	(+)-Isomer is a selective α-adrenoceptor antagonist; (−)-isomer is an imidazoline ligand that induces insulin secretion, mediated by the blockade of ATP-sensitive potassium channels in pancreatic β cells; I1 imidazoline binding site antagonist	LOPAC
-0.189219	0.666307	4-DAMP	4-DAMP is a M3 preferring cholinergic receptor antagonist	LOPAC
-0.187734	0.206715	Tschimganine	antimicrobial agent and an antineoplastic agent	Natural
-0.186905	0.833993	Proglumide	CCK antagonist; selectively blocks CNS effects	LOPAC
-0.186875	0.540458	Aurintricarboxylic acid	Readily polymerizes in aqueous solution, forming a stable free radical that inhibits protein-nucleic acid interactions. It is a potent inhibitor of ribonuclease and topoisomerase II by preventing the binding of the nucleic acid to the enzyme. It stimulates tyrosine phosphorylation processes including the Jak2/STAT5 pathway in NB2 lymphoma cells, ErbB4 in neuroblastoma cells, and MAP kinases, Shc …	LOPAC
-0.1867	0.585236	Calcipotriene	a synthetic derivative of calcitriol or Vitamin D, is used in the treatment of psoriasis and marketed under the trade name Dovonex. It has comparable affinity with calcitriol (Vit. D) for the Vitamin D receptor (VDR), while being less than 1% as active as the calcitriol in regulating calcium metabolism	FDA
-0.186144	0.664249	Colchicine	Antimitotic agent that disrupts microtubules by binding to tubulin and preventing its polymerization. Stimulates the intrinsic GTPase activity of tubulin. Induces apoptosis in several normal and tumor cell lines and activates the JNK/SAPK signaling pathway.	LOPAC
-0.186006	0.650781	Flutamide	a potent competitor of testosterone and dihydrotestosterone receptors	LOPAC
-0.185794	0.608775	SR-58611A	Selective β3-adrenergic receptor agonist	LOPAC
-0.184885	0.453451	Cephalexin Monohydrate	a bactericidal agent that acts by the inhibition of bacterial cell-wall synthesis	FDA
-0.184576	0.229383	CAY10603	HDAC6 inhibitor	Epigenetic
-0.184008	0.807565	Fosmidomycin sodium salt hydrate	an inhibitor of 1-deoxy-D-xylulose 5-phosphate reductoisomerase (DXR) (MEP synthase)	LOPAC
-0.182605	0.78337	R(-)-N6-(2- Phenylisopropyl) adenosine	A1 adenosine receptor agonist	LOPAC
-0.181373	0.80359	CGS-21680 hydrochloride	Adenosine receptor agonist, which possesses selectivity for A2 verses A1 receptors	LOPAC
-0.180929	0.265435	LSD1-C12	highly potent, specific, and reversible Lysine Specific Demethylase-1 (LSD1) inhibitor	Epigenetic
-0.179696	0.472422	Solanesol	This C45 isoprenoid alcohol is the most abundant lipid in tobacco leaves. It may be an important precursor of the tumorigenic polynuclear aromatic hydrocarbons of smoke	Natural
-0.178854	0.678925	Sumanirole maleate	highly selective and potent dopamine D2 receptor agonist	LOPAC
-0.178075	0.423854	Kainic acid	an agonist at the kainate class of ionotropic glutamate receptors	Natural
-0.177377	0.344222	Marein	1. Marein shows neuroprotective effect on PC12 cell damage induced by methylglyoxal, which is due to a reduction of damage to mitochondria function and activation of the AMPK signal pathway, indicates that marein may be a potent compound for preventing/counteracting diabetic encephalopathy. 2. Marein shows antioxidant activity. 3. Marein can improve insulin resistance induced by high glucose in H…	Natural
-0.177377	0.631524	Narasin	Polyether ionophores, such as Narasin, have a hydrophilic interior and a hydrophobic exterior. The lipophilic ionophore attaches to the lipid rich cell membranes of Gram-positive bacteria. Ionophores bind Na+, K+, and H+ and facilitate their transfer across the bacterial cell membrane, resulting in an increase in H+ concentration on the inside of the Gram-positive cell. Therefore, the H+ ATPase p…	Natural
-0.176569	0.517255	Carbinoxamine Maleate	H1 Histamine receptor antagonist.	FDA
-0.174743	0.656331	Fluphenazine dihydrochloride	D1/D2 dopamine receptor antagonist; phenothiazine antipsychotic; H1 histamine receptor antagonist.	LOPAC
-0.174549	0.601843	Difluprednate	a topical corticosteroid and prednisolone acetate derivative, with anti-inflammatory activity. Upon instillation into the eye, difluprednate binds to and activates the glucocorticoid receptor (GR). The receptor-ligand complex binds to promoter regions of certain genes and initiates RNA transcription. This results in an induction of synthesis of phospholipase A2 inhibitory proteins, thereby inhibi…	FDA
-0.174491	0.275482	Topiramate	Kainate GluR5 receptor antagonist; anticonvulsant.	FDA
-0.17423	0.732008	Pindolol	β1-adrenoceptor antagonist; putative 5-HT1A serotonin receptor agonist; vasodilator.	FDA
-0.174028	0.609754	Sulindac	Nonsteroidal anti-inflammatory; preferential inhibitor of COX-1.	FDA
-0.173907	0.772301	Pentoxifylline	Phosphodiesterase inhibitor; inhibits synthesis of tumor necrosis factor α (TNF-α).	FDA
-0.173789	0.66339	4-Hydroxy benzhydrazide	4-Hydroxybenzhydrazide (PAHBAH), is used for assaying α-amylase and glucoamylase activities. The assay based on PAHBAH measures non-specifically the free reducing sugar groups present in samples at 415nm colorimetrically	LOPAC
-0.173399	0.620275	Deferoxamine Mesylate	iron chelating agent	FDA
-0.173381	0.717289	L-3,4-Dihydroxy phenylalanine	natural isomer of the immediate precursor of dopamine that crosses the blood-brain barrier	LOPAC
-0.172825	0.854505	S-Nitroso glutathione	S-Nitrosoglutathione (GSNO) inhibits the activity of sarcoplasmic reticulum-bound creatine kinase in rabbit skeletal muscle and eventually reduces ATP driven Ca2+ uptake in sarcoplasmic reticulum vesicles.[2] GSNO in airway cells relaxes airway smooth muscle and enhances airway ciliary motility. It also blocks airway epithelial amiloride-sensitive sodium transport while stimulating calcium-depend…	LOPAC
-0.17279	0.557081	Cortisone Acetate	Cortisone 21-acetate is a prodrug,[3] which has glucocorticoid and mineralocorticoid properties.[2] It is used as a therapeutic option for glucocorticoid replacement	FDA
-0.171588	0.557061	WZ4003	a potent and selective inhibitor of NUAK1 and NUAK2 kinases	LOPAC
-0.171406	0.78549	Glipizide	an ATP-dependent K+ channel blocker	FDA
-0.171253	0.227273	Prilocaine·HCl	Used for local nerve block and for spinal anesthesia; pharmacological properties are similar to those of lidocaine	FDA
-0.171035	0.400138	Protriptyline·HCl	Norepinephrine uptake blocker	FDA
-0.169428	0.584744	Cilengitide trifluoroacetic acid salt	a vascular targeting agent (VTA) that acts as an integrin antagonist; selectively blocks activation of the αvβ3 and αvβ5 integrins	LOPAC
-0.169241	0.390425	Amiloride hydrochloride	Selective T-type calcium channel blocker and blocker of epithelial sodium channel. Selective inhibitor of urokinase plasminogen activator (uPA).	LOPAC
-0.168939	0.683294	ZD 7114 hydrochloride	β3-adrenoceptor agonist.	LOPAC
-0.168809	0.537762	Amlexanox	an anti-allergy and anti-asthma drug that blocks histamine and leukotriene release from leukocytes and mast cells. Amlexanox has also been shown to inhibit cahaperone activity of Hsp90, and S100A13, which is involved in transport of proteins devoid of signal peptide sequences	LOPAC
-0.168721	0.55821	Darifenacin·HBr	an antispasmodic muscarinic antagonist, selective for blocking the M3 muscarinic acetylcholine receptor	FDA
-0.167148	0.799192	Perphenazine	D2 dopamine receptor antagonist; α-adrenergic receptor antagonist and σ-receptor agonist	LOPAC
-0.166751	0.671533	5-fluoro-5'- deoxyuridine	a mitotic inhibitor	LOPAC
-0.166617	0.654166	4-Hydroxy-3- methoxy phenylacetic acid	catecholamine metabolite	LOPAC
-0.166363	0.588604	Lupinine	quinolizidine alkaloid present in Lupinus species of the Family Fabaceae. It has been shown to lower the locomotion excitation brought on by ethanol anesthesia in mice. Lupinine has also shown some ability to inhibit human and rabbit cholinesterases	Natural
-0.165462	0.631698	Cortisone 21- acetate	a prodrug,[3] which has glucocorticoid and mineralocorticoid properties.[2] It is used as a therapeutic option for glucocorticoid replacement	LOPAC
-0.164328	0.637027	beta-Estradiol	major premenopausal hormone in women and is essential for spermiogenesis, sperm maturation and motility in men; mediates physiological functions through estrogen receptor (ER) α and ERβ	LOPAC
-0.162662	0.576875	Imatinib mesylate	a tyrosine kinase inhibitor with antineoplastic activity. Imatinib is a potent inhibitor of the Bcr-Abl kinase encoded by the bcr-abl oncogene as well as receptor tyrosine kinases encoded by c-kit and platelet-derived growth factor receptor (PDGFR) oncogenes	LOPAC
-0.162304	0.551766	Busulfan	an alkylsulfonate; an alkylating agent that forms DNA-DNA intrastrand crosslinks between the DNA bases guanine and adenine and between guanine and guanine	FDA
-0.161765	0.510032	Alosetron·HCl	a potent and highly selective antagonist of serotonin 5-HT3 receptors	FDA
-0.161227	0.347745	Aminoguanidine hydrochloride	Irreversible inhibitor of iNOS that displays some selectivity over eNOS and nNOS	LOPAC
-0.160698	0.722772	Quinidine sulfate	the sulfate salt form of quinidine, an alkaloid with antimalarial and antiarrhythmic (Class la) properties. Quinidine sulfate exerts its anti-malarial activity by acting primarily as an intra-erythrocytic schizonticide through association with the hemepolymer (hemozoin) in the acidic food vacuole of the parasite thereby preventing further polymerization by heme polymerase enzyme. This results in …	LOPAC
-0.159881	0.538377	Pimecrolimus	a macrolactam ascomycin derivative that acts as an immune suppressant. It binds with high affinity to macrophilin-12 (FKBP-12) and inhibits calcineurin, a calcium-dependent phosphatase. Pimecrolimus inhibits production of pro-inflammatory cytokines by T cells and mast cells and prevents the release of inflammatory cytokines and mediators from mast cells. It has been used clinically as a treatment…	FDA
-0.159309	0.616658	Dofequidar fumarate	a potent inhibitor of MDR-1	LOPAC
-0.159215	0.348117	cis-4- Aminocrotonic acid	GABAC receptor agonist	LOPAC
-0.159059	0.567014	Azelastine·HCl	H1 histamine receptor antagonist; NF-kB activator	FDA
-0.157814	0.639602	Oxaliplatin	Oxaliplatin a platinum analogue, causes DNA damage and cell death by binding to DNA and forming inter and intrastrand crosslinks preventing replication and transcription.	FDA
-0.157695	0.835252	Ipratropium·Br	a nonselective muscarinic acetylcholine receptor antagonist and a bronchodilator; acts as a β2 adrenoreceptor agonist; anticholinergic agent and competes with acetylcholine	FDA
-0.156552	0.545556	L-allylglycine	Glutamic acid decarboxylase inhibitor	LOPAC
-0.155934	0.738564	Perlapine	a potent and selective agonist of hM3Dq DREADD (Designer Receptors Exclusively Activated by Designer Drugs), which does not activate the native human M3 receptor. Perlapine is a neuroleptic agent that exhibits sedative and sleep-promoting properties	LOPAC
-0.155877	0.454852	Monensin	Na+ ionophore; blocks glycoprotein secretion	Natural
-0.154967	0.495586	Cefaclor	a second generation cephalosporin with broad spectrum activity against Gram-negative and Gram-positive bacteria. It binds to penicillin-binding proteins and thereby inhibits the cell wall synthesis causing cell death	FDA
-0.154892	0.738564	Kynurenic acid	Kynurenic acid (KynA) is a non-selective antagonist of N-methyl-d-aspartate (NMDA),[1] α-amino-3-hydroxy-5-methyl-4-isoxazolepropionic acid (AMPA) and kainate receptors.[2] It blocks kainic acid neurotoxicity.[3] Kynurenic acid also blocks nicotinic acetylcholine receptors.	LOPAC
-0.152917	0.496631	Prostaglandin A1	Cyclopentenone prostaglandin that stimulates the expression of stress genes.	Natural
-0.15261	0.646197	Erythro-9-(2- hydroxy-3- nonyl)adenine HCl	Adenosine deaminase inhibitor.	LOPAC
-0.152325	0.728832	3,5- Dinitrocatechol	Selective inhibitor of catechol O-methyl transferase (COMT)	LOPAC
-0.152263	0.785726	Oxymetazoline hydrochloride	a partial α2A-adrenoceptor agonist; agonist at 5-HT1A, 5-HT1B, and 5-HT1D serotonin receptors. It is a mixed agonist-antagonist at 5-HT1C serotonin receptors.	LOPAC
-0.151229	0.672614	Hypotaurine	Antioxidant that binds hydroxyl radicals. Endogenous inhibitory neuromodulator that is blocked by strychnine and picrotoxin. Inhibits the Na2+-dependent transport of GABA and β-alanine	LOPAC
-0.151034	0.202685	Colchicine	Antimitotic agent that disrupts microtubules by binding to tubulin and preventing its polymerization. Stimulates the intrinsic GTPase activity of tubulin. Induces apoptosis in several normal and tumor cell lines and activates the JNK/SAPK signaling pathway.	Natural
-0.150781	0.634505	L-Dopa ethyl ester	L-Dopa ethyl ester is a prodrug of levodopa that has greater gastric solubility.	LOPAC
-0.149321	0.365014	Thioguanine (6-Thioguanine)	Ribosylated and phosphorylated by the same pathway as natural purine bases; as the nucleotide, inhibits a variety of cellular processes involved in nucleic acid synthesis.	FDA
-0.147938	0.581907	Daptomycin	a cyclic lipopeptide antibiotic; it disrupts the plasma membrane causes rapid depolarization and inhibits the synthesis of protein, RNA and DNA.	FDA
-0.146831	0.644928	MI-2	an essential component of histone methyltransferase complexes involving the mixed lineage leukemia (MLL) gene product.1,2 Also, the leukemogenic activity of MLL fusion proteins depends on their direct interaction with menin.3 MI-2 potently binds menin, blocks the menin-MLL fusion protein interaction (IC50 = 0.45 μM), and induces apoptosis in cells expressing MLL fusion proteins.	Epigenetic
-0.146334	0.78564	SANT-1	a potent sonic hedgehog pathway (Shh) antagonist that directly inhibits by binding to the smoothened (Smo) receptor.	LOPAC
-0.145839	0.619296	Tamoxifen citrate	Protein kinase C inhibitor.	LOPAC
-0.145079	0.629442	9-cyclopentyl adenine monomethanesulf onate	A stable, cell-permeable, non-competitive adenylyl cyclase inhibitor that targets the P-site domain.	LOPAC
-0.144753	0.65789	Diatrizoate Meglumine	The osmotic effect of diatrizoate sodium, and diatrizoate meglumine and diatrizoate sodium combination solutions draws fluid into the intestine, thus helping to dislodge the meconium impaction	FDA
-0.144539	0.612429	Indole-3-carbinol	Indole-3-carbinol (I3C) activates aryl hydrocarbon receptor (AhR) and induces G1 cell cycle arrest and apoptosis.	Natural
-0.143924	0.482542	Vindoline	a monoterpenoid indole alkaloid exclusive to the Madagascar periwinkle plant (Catharanthus roseus). Vindoline combines catharanthine to derive the anti-cancer agents vinblastine and vincristine.	Natural
-0.142459	0.639132	Olsalazine·Na	an anti-inflammatory drug used in the treatment of Inflammatory Bowel Disease and Ulcerative Colitis. Olsalazine is a derivative of salicylic acid. Inactive by itself (it is a prodrug), it is converted by the bacteria in the colon to mesalamine. Mesalamine works as an anti-inflammatory agent in treating inflammatory diseases of the intestines.	FDA
-0.140139	0.650057	(-)-Eseroline fumarate	Metabolite of physostigmine (eserine) that is cytotoxic in several neuronal cell lines; it displays both anti-acetylcholinesterase and opiate agonist activities; potent analgesic.	LOPAC
-0.140134	0.652	Tobramycin	Binds to 70S ribosomal subunit; inhibits translocation; elicits miscoding	FDA
-0.136801	0.791508	Cyclothiazide	Blocks the rapid desensitization of the AMPA glutamate receptors and markedly prolongs the decay time of the evoked excitatory post-synaptic current.	LOPAC
-0.135713	0.488363	Benazepril·HCl	Benazepril is a long-acting angiotensin converting enzyme (ACE) inhibitor.	FDA
-0.13562	0.522851	Econazole Nitrate	interacts with 14-α demethylase, a cytochrome P-450 enzyme necessary to convert lanosterol to ergosterol. Inhibition of ergosterol results in increased cellular permeability causing leakage of cellular contents. Econazole may also inhibit endogenous respiration, interact with membrane phospholipids, inhibit the transformation of yeasts to mycelial forms, inhibit purine uptake, and impair triglyce…	FDA
-0.135352	0.800483	L-3,4-Dihydroxy phenylalanine methyl ester hydrochloride	a precursor to L-DOPA[1] that crosses the blood-brain barrier	LOPAC
-0.134783	0.522873	Almotriptan malate	a serotonin 5HT-1B/1D-receptor agonist	FDA
-0.133697	0.664456	Tyrphostin 23	a small molecule inhibitor of epidermal growth factor (EGF) receptor kinase function. This molecule associates with the substrate subsite of the protein tyrosine kinase (PTK) domain	LOPAC
-0.132418	0.783224	Doxepin hydrochloride	Tricyclic antidepressant that is a more potent inhibitor of norepinephrine uptake than of serotonin uptake; antagonist at H1 histamine, muscarinic cholinergic, and α-adrenoreceptors.	LOPAC
-0.131549	0.6749	Glimepiride	a potent blocker of cardiac KATP channels activated by pinacidil	FDA
-0.131531	0.748949	Vanillic acid diethylamide	CNS and respiratory stimulant	LOPAC
-0.130284	0.699702	Clemizole hydrochloride	a potent and preferring inhibitor of TRPC5 that efficiently blocks heterologously expressed homomeric TRPC5 channels as well as heteromeric TRPC1:TRPC5 channels. Clemizole is a potent and selective H1 histamine receptor antagonist.	LOPAC
-0.12924	0.313785	Ammonium pyrrolidine dithiocarbamate	Prevents induction of nitric oxide synthetase by inhibiting translation of NOS mRNA	LOPAC
-0.128438	0.663351	SR 59230A Oxalate salt	a β3-adrenoceptor antagonist	LOPAC
-0.128251	0.689812	A-68930 hydrochloride	a potent and selective agonist of D1 dopamine receptor	LOPAC
-0.128107	0.659207	Taurine	Non-selective endogenous agonist at glycine receptors. Conditionally essential sulfonated amino acid which modulates apoptosis in some cells; functions in many metabolic activities; a product of methionine and cysteine metabolism.	LOPAC
-0.126931	0.744662	GBR-12909 dihydrochloride	Highly selective dopamine reuptake inhibitor with behavioral effects similar to cocaine.	LOPAC
-0.126351	0.415188	Maritimein	an aurone, a type of natural phenol	Natural
-0.126351	0.615788	Noreleagnine	a selective inhibitor of monoamine oxidase type A (MAO-A) and beta-secretase	Natural
-0.126246	0.643	MHPG piperazine	Cerebral norepinephrine metabolite.	LOPAC
-0.125951	0.720245	L-745,870 hydrochloride	Selective D4 dopamine receptor antagonist.	LOPAC
-0.125812	0.647708	Cafestol	a coffee-specific diterpene.[1] It has anti-carcinogenic and anti-inflammatory activities.[2] Cafestol stimulates apoptosis in cells associated with colorectal and renal cancer (Caki cells). It is used to study mechanisms of anti-oxidation related to hydrogen peroxide induced oxidative stress and DNA damage.[1] Cafestol increases the level of glutathione (GSH), by stimulating γ-glutamylcysteine s…	Natural
-0.125197	0.516051	Carmustine	a DNA alkylating agent causing DNA interstrand crosslinks	FDA
-0.124881	0.349862	Triamterene	Weak diuretic with potassium sparing properties; blocks Na+ reuptake in the kidneys.	FDA
-0.124654	0.518459	Cefadroxil Monohydrate	a broad spectrum cephalosporin antibiotic	FDA
-0.124475	0.727912	(-)-MK-801 hydrogen maleate	Highly potent and selective non-competitive NMDA glutamate receptor antagonist that acts at the NMDA receptor-operated ion channel as an open channel blocker.	LOPAC
-0.123781	0.657826	Pivmecillinam	a penicillanic acid ester that is the [(2,2-dimethylpropanoyl)oxy]methyl ester and prodrug of mecillinam. It has a role as an antiinfective agent, an antibacterial drug and a prodrug.	LOPAC
-0.123255	0.437801	Atomoxetine·HCl	a selective norepinephrine (noradrenaline) reuptake inhibitor	FDA
-0.121562	0.569494	Cyclopentolate	blocks the action of acetylcholine; anticholinergic effect similar to atropine	FDA
-0.121445	0.650144	Temozolomide	a DNA methylating agent and drug resistance-modifying agent; anti-tumor and anti-angiogenic. Temozolomide induces G2/M arrest and apoptosis through adduction of a methyl group to O6 position of guanine in genomic DNA and functional inactivation of DNA repair protein O(6)-alkylguanine DNA alkyltransferase (AGT) in base excision repair (BER) pathway.	FDA
-0.121444	0.855092	L-alpha-Methyl-p- tyrosine	a tyrosine hydroxylase enzyme inhibitor	LOPAC
-0.121276	0.633364	Midodrine·HCl	α-Adrenergic agonist; vasoconstrictor	FDA
-0.120929	0.615795	Allopurinol	Inhibitor of xanthine oxidase and de novo pyrimidine biosynthesis	FDA
-0.120431	0.523676	Betaine	End-product of oxidative metabolism of choline, betaine is a general methyl donor, in particular in a minor pathway of methionine biosynthesis. It is used to treat homocystinuria, which is a defect in the major pathway of methionine biosynthesis.	FDA
-0.120369	0.776898	Gemifloxacin mesylate	a broad-spectrum quinolone antibacterial	LOPAC
-0.11955	0.69325	NS5806	increases peak current amplitude of the potassium channel Kv4.3 (EC50 = 5.3 uM). NS5806 also slows Kv4.3 and Kv4.2 current dacay in channel complexes containing KChIP2.	LOPAC
-0.119246	0.673714	Lapatinib Ditosylate	the ditosylate salt of lapatinib, a synthetic, orally-active quinazoline with potential antineoplastic activity. Lapatinib reversibly blocks phosphorylation of the epidermal growth factor receptor (EGFR), ErbB2, and the Erk-1 and-2 and AKT kinases; it also inhibits cyclin D protein levels in human tumor cell lines and xenografts.	FDA
-0.118116	0.775973	Trifluoperazine· HCl	a phenothiazine derivative and a dopamine antagonist with antipsychotic and antiemetic activities. Trifluoperazine exerts its antipsychotic effect by blocking central dopamine receptors	FDA
-0.117007	0.650237	WIN 62,577	Non-peptide NK1 tachykinin receptor antagonist.	LOPAC
-0.114953	0.69964	Tazarotene	a synthetic, topical retinoid. Tazarotene induces the expression of tazarotene-induced gene 3 (TIG3), a tumor suppressor gene.	LOPAC
-0.114681	0.617999	Hydralazine HCl	Inhibits DNA methyltransferase and modulates epigenetic regulation of gene expression. Non-selective MAO-A/B inhibitor; antihypertensive; semicarbazide-sensitive amine oxidase inhibitor.	LOPAC
-0.113966	0.813394	Cimetidine	H2 histamine receptor antagonist; I1 imidazoline receptor agonist; anti-ulcer agent. Blocks cancer metastasis by inhibiting the expression of E-selectin on the surface of endothelial cells, thus blocking tumor cell adhesion.	FDA
-0.112587	0.721576	Donitriptan monohydrochlorid e	a potent, selective 5-HT1B/1D agonist.	LOPAC
-0.11237	0.209366	Torsemide	a loop diuretic of the pyridine-sulfonylurea class with antialdosteronergic properties and inhibitor of the Na+/K+/2Cl- carrier system.	FDA
-0.11148	0.769188	alpha-Methyl-DL- tyrosine methyl ester HCl	Tyrosine hydroxylase inhibitor.	LOPAC
-0.111087	0.752735	Oxolinic acid	a quinolone antibiotic. It is a DNA-gyrase (topoisomerase II) inhibitor used for studies on DNA winding and coiling and acts as a dopamine reuptake inhibitor for studies on dopaminergic neurotransmission processes.	LOPAC
-0.110518	0.506488	Methazolamide	a cell-permeable and potent carbonic anhydrase (CA) inhibitor that is used in the treatment of glaucoma	FDA
-0.110004	0.785348	DFB	Positive allosteric modulator of the metabotropic glutamate receptor mGluR5	LOPAC
-0.109194	0.639199	Flumazenil	Highly specific benzodiazepine receptor antagonist.	LOPAC
-0.107243	0.610869	Zerumbone	a TRAIL-induced apoptosis potentiator. It potentiates TRAIL-induced apoptosis through the up-regulation of DR4 and DR5 expression and the down-regulation of cFLIP.	Natural
-0.107235	0.463921	Sinomenine	a herbal medicine used to treat inflammatory diseases like rheumatoid arthritis. Sinomenine had anti-inflammatory effects in several animal models of inflammation, and inhibits mast cell degranulation and histamine release. Additionally, Sinomenine potentiates renewal of human embryonic stem cells.	Natural
-0.107118	0.488712	Rivastigmine tartrate	an orally available, brain penetrant, reversible cholinesterase inhibitor that enhances cognitive function in patients with Alzheimer′s and Parkinson′s diseases. Rivastigmine inhibits both butyrylcholinesterase and acetylcholinesterase.	LOPAC
-0.106944	0.666787	4-Imidazoleacrylic acid	Competitive antagonist at GABAC receptors.	LOPAC
-0.106894	0.482554	(+)-Taxifolin	chemopreventive agent by regulating genes via an ARE-dependent mechanism	Natural
-0.106763	0.621882	GSK2578215A	a potent inhibitor of leucine-rich repeat kinase-2 (LRRK2); stimulates mitochondrial fragmentation, autophagy and mitophagy	LOPAC
-0.106157	0.411986	Flunisolide	activates glucocorticoid receptors	FDA
-0.106001	0.767559	Sildenafil Citrate	a potent, selective inhibitor of cGMP specific phosphodiesterase type 5 (PDE5)	FDA
-0.105975	0.832234	Fenobam	a potent, selective, noncompetitive glutamate mGluR5 receptor antagonist	LOPAC
-0.10423	0.638964	Darglitazone sodium salt	the sodium salt form of darglitazone, an agent belonging to the glitazone class of antidiabetic agents with antihyperglycemic and anti-inflammatory activities. Darglitazone may be able to abrogate acute cerebral inflammatory responses via its suppression of proinflammatory gene expression.	LOPAC
-0.103411	1.02133	Protoporphyrin IX	Protoporphyrin IX penetrates human erythrocytes and aids the release of oxygen from them. It forms complexes with myoglobin and hemoglobin. It is a photosensitizer used in the photodynamic therapy of cancer.[2][3] Protoporphyrin IX levels are elevated in tumor cells due to metabolism anomalies compared to normal cells.[7]	LOPAC
-0.103193	0.734837	Amlodipine	an L-type calcium channel blocker	FDA
-0.102393	0.612597	Anastrozole	Anastrozole, which contains a triazole functional group, reversibly binds to the cytochrome P-450 component of aromatase.[4][1] Binding interferes with the catalytic properties of aromatase, which results in inhibition of estrogen synthesis	FDA
-0.102347	0.729602	Primaquine diphosphate	Although its mechanism of action is unclear, primaquine bind to and alter the properties of protozoal DNA. This agent eliminates tissue (exo-erythrocytic) malarial infection, preventing the development of the erythrocytic forms of the parasite which are responsible for relapses in Plasmodium vivax and ovale malaria.	FDA
-0.102333	0.803115	TFCA	a Liver X receptor α (LXRα) antagonist that reduces lipid accumulation and fatty liver in mice	LOPAC
-0.101191	0.780868	BIO	6-bromoindirubin-3′-oxime (BIO) is a potent, reversible and ATP-competitive GSK-3α/β inhibitor and the first pharmacological agent shown to maintain self-renewal in human and mouse embryonic stem cells.	LOPAC
-0.100737	0.782536	MRS 1523	Selective A3 adenosine receptor antagonist in the rat.	LOPAC
-0.100454	0.452032	SB 200646 hydrochloride	5-HT2C/2B serotonin receptor antagonist.	LOPAC
-0.0994471	0.699044	Paroxetine·HCl	a selective serotonin reuptake inhibitor	FDA
-0.0992604	0.686902	Prednisone	a synthetic glucocorticoid with anti-inflammatory and immunosuppressive activity	FDA
-0.099064	0.656514	Clofibrate	Peroxisome proliferator-activated receptor-α (PPARα) agonist. Antihyperlipoproteinemic believed to act by inhibiting cholesterol biosynthesis.	LOPAC
-0.0988364	0.762161	Pimozide	D2 dopamine receptor antagonist; binds with high affinity to the cloned 5-HT7 receptor; Ca2+ channel antagonist; antipsychotic	LOPAC
-0.0986253	0.561241	Idoxuridine	anti-herpesvirus antiviral drug. It is a nucleoside analogue, a modified form of deoxyuridine, similar enough to be incorporated into viral DNA replication, but the iodine atom added to the uracil component blocks base pairing	FDA
-0.0984018	0.65009	(±)-Taxifolin	chemopreventive agent by regulating genes via an ARE-dependent mechanism	LOPAC
-0.0977458	0.692691	Trifluperidol hydrochloride	a dopamine receptor antagonist with antipsychotic effects used in the treatment of schizophrenia	LOPAC
-0.0967514	0.537414	Kyotorphin acetate salt	a neuroactive dipeptide (Tyr-Arg) shown to have analgesic, neuroprotective, and neuromodulatory properties. It is synthesized in nerve terminals and found in the brain and in cerebro-spinal fluid (CSF). Kyotorphin indirectly stimulates opioid receptors by releasing methionine enkephalin (met-enkephalin). CSF levels are lower in patients with persistent pain and in patients with Alzheimer’s diseas…	LOPAC
-0.0963282	0.45233	Isosakuranetin	an O-methylated flavonoid	Natural
-0.0963282	0.619722	(+)-Isocorydine hydrochloride	an aporphine alkaloid	Natural
-0.0954371	0.790187	JNJ-63533054	Potent and selective GPR139 agonist (EC50 = 16 nM). Selective for GPR139 over a panel of GPCRs, ion channels and transporters, including GPR142. Brain and cell penetrant. Orally bioavailable.	LOPAC
-0.0953862	0.473338	Feroline	Terpenoid ester exhibiting estrogenic activity.	Natural
-0.0935346	0.794326	Tolcapone	an orally active catechol-O-methyltransferase (COMT) inhibitor. It inhibits both central and peripheral COMT. Tolcapone crosses the blood-brain barrier, and has been used for L-DOPA adjunct therapy in the treatment of Parkinson′s Disease.	FDA
-0.0932143	0.588245	Phenelzine Sulfate	Non-selective MAO-A/B inhibitor.	FDA
-0.0931318	0.418733	Tazarotene	induces the expression of tazarotene-induced gene 3 (TIG3), a tumor suppressor gene. It is a prodrug of tazarotenic acid, which specifically activates RARb and RARg, only weakly activates RARa, and is inactive at retinoid X receptors (RXRs).	FDA
-0.0924092	0.645473	EGTA	Chelating agent selective for Ca2+. Binds one cation per molecule.	LOPAC
-0.0922578	0.392503	Pentostatin	a ring-expanded nucleoside (REN) that potently inhibits adenosine deaminase, which leads to lymphocyte toxicity.	FDA
-0.0894728	0.740616	MTEP HCl	MTEP is a potent and highly selective antagonist for mGluR5.	LOPAC
-0.0894723	0.503593	R(+)-Schisandrin A	a bioactive lignan found in the fruits of several species of the Schisandra genus that has liver-protective, anti-tumor and antioxidant activities. It increases the activity of superoxide dismutase and glutathione peroxidase and shows anti-ischemic effects in vivo.	Natural
-0.0882953	0.828699	Molsidomine	Orally active, long acting vasodilator; antianginal; converted by the liver to the active metabolite, SIN-1	LOPAC
-0.0881764	0.474144	Ezetimibe	inhibits intestinal cholesterol absorption by preventing cholesterol uptake by Niemann-Pick C1 Like 1 (NPC1L1) protein	FDA
-0.0874533	0.578484	Altretamine	antineoplastic; alkylating agent	FDA
-0.0874145	0.711353	Doxazosin mesylate	α1-adrenoceptor antagonist; relaxes smooth muscles of the prostate	LOPAC
-0.0872127	0.839853	5-Nitro-2-(3- phenylpropyl amino)benzoic acid	potent Cl- channel blocker	LOPAC
-0.0867553	0.403043	gamma-Acetylinic GABA	Irreversible GABA transaminase inhibitor	LOPAC
-0.0864017	0.819831	Labetalol hydrochloride	Competitive β-adrenoceptor antagonist.	LOPAC
-0.0858522	0.231405	Pravastatin·Na	Pravastatin sodium is a competitive, water-soluble 3-hydroxy-3-methylglutaryl coenzyme A (HMG-CoA) reductase inhibitor	FDA
-0.0855527	0.686488	Pyrocatechol	a useful precursor to various pesticides, flavors, and fragrances. It is the conjugate acid of a chelating agent used widely in coordination chemistry	LOPAC
-0.0851425	0.504013	Benztropine Mesylate	centrally acting muscarinic acetylcholine receptor antagonist and dopamine transporter (DAT) inhibitor	FDA
-0.0843903	0.738055	Cephalosporin C zinc salt	Cephalosporins disrupt the synthesis of the peptidoglycan layer of bacterial cell walls.	LOPAC
-0.0842304	0.421988	Lapidin	bicyclic sesquiterpene; antinociceptive, anti-inflammatory, and antipyretic activities	Natural
-0.0833931	0.563118	p-Aminoclonidine hydrochloride	α2-adrenoceptor agonist.	LOPAC
-0.0829066	0.639376	Tinidazole	an antiprotozoal, antibacterial agent. The nitro- group of tinidazole is reduced by cell extracts of Trichomonas. The free nitro- radical generated as a result of this reduction may be responsible for the antiprotozoal activity	FDA
-0.0819122	0.75952	SB 674042	potent and selective OX1R antagonist. SB-674042 binds with high affinity to OX1R and mediates intracellular calcium flux in OX1R-expressing cells	LOPAC
-0.0818773	0.890842	Nortriptyline hydrochloride	antidepressant that is a more potent inhibitor of the norepinephrine transporter (Ki = 3.4 nM) than the serotonin transporter (Ki = 161 nM). 5-HT2 serotonin receptor antagonist.	LOPAC
-0.081771	0.627597	Nicotine	Prototype nicotinic acetylcholine receptor agonist; naturally occurring isomer.	FDA
-0.0813041	0.626919	Miconazole	interacts with 14-α demethylase, a cytochrome P-450 enzyme necessary for ergosterol biosynthesis. The inhibition of ergosterol results in increased cellular permeability causing leakage of cellular contents. Miconazole may also inhibit endogenous respiration, interact with phospholipids in the cell membrane, inhibit the transformation of yeasts to mycelial forms, inhibit purine uptake, and interf…	FDA
-0.0810329	0.489727	Acetylsalicylic acid	Blocks the production of prostaglandins by inhibiting cyclooxygenase (prostaglandin H synthase), with greater selectivity toward the COX-1 isoform. The antithrombotic effect is due to the inhibition of COX-1 in platelets that blocks thromboxane production and platelet aggregation. Chemopreventive against colorectal and other solid tumors.	LOPAC
-0.080984	0.476324	Aminohippurate·Na	Aminohippurate sodium is an agent to measure effective renal plasma flow (ERPF). It is the sodium salt of para-aminohippuric acid, commonly abbreviated “PAH”.	FDA
-0.0797088	0.788756	Pirfenidone	inhibits collagen production and fibroblast proliferation. It has shown antifibrotic and anti-inflammatory properties	LOPAC
-0.0792248	0.749938	Yoda1	a specific activator of mouse and human cation channel Piezo1, a mechanosensitive channel that mediates Ca2+ influx	LOPAC
-0.0792245	0.276571	Isorhoifolin	Isorhoifolin and vicenin II are main compounds of ethyl acetate fraction (EAcF) obtained from Erythrina velutina leaves, EAcF increases the cardiac contractile force by increasing the l-type calcium current and activating the adrenergic receptor pathway. Isorhoifolin has antioxidant effects. It displays an anti-leakage effect comparable to or greater than diosmin. Isorhoifolin in Pilea microphyll…	Natural
-0.0792245	0.727773	6-Hydroxytropinone		Natural
-0.0786553	0.785955	Dobutamine·HCl	a synthetic catecholamine that stimulate the β1 -adrenoceptor receptor.	FDA
-0.0779989	0.422484	Laudanosoline·HBr·3H2O		Natural
-0.0779989	0.675321	18-β-Glycyrrhetinic acid	a pentacyclic triterpenoid found in the Glycyrrhiza glabra L.(liquorice) roots.[1] It is the key metabolite of glycyrrhizin[2] and glycyrrhizic acid.	Natural
-0.0779967	0.383609	Rabeprazole·Na	gastric proton pump inhibitor. It suppresses the production of acid in the stomach by inhibiting the gastric H+/K+ATPase (hydrogen-potassium adenosine triphosphatase) at the secretory surface of the gastric parietal cell. Rabeprazole sodium has been used clinically to treat acid-reflux disorders (GERD), peptic ulcer disease, H. pylori eradication, and prevent gastroinetestinal bleeds associated w…	FDA
-0.0749591	0.50321	Bupropion	Inhibits the dopamine and norepinephrine transporters with Kis of 2.8 μM and 1.4 μM, respectively. Does not inhibit the serotonin transporter (Ki = 45 μM). Antidepressant.	FDA
-0.0743075	0.560594	Azacitidine	A potent growth inhibitor and cytotoxic agent; inhibits DNA methyltransferase	FDA
-0.0731745	0.380854	Pyrazinamide	a prodrug that stops the growth of M. tuberculosis.	FDA
-0.0720042	0.529501	Bulleyaconotine A	Bulleyaconitine has analgesic and anti-inflammatory properties and has been used for the treatment of chronic pain and rheumatoid arthritis	Natural
-0.0719191	0.480595	Acetazolamide	a member of sulfonamide drug family.[4] It as an ability to inhibit the activity of carbonic anhydrase.[1] It rapidly increases cerebral blood flow (CBF) and is used as an investigative tool in CBF studies.[1] Acetazolamide acts as a therapeutic agent for epilepsy, glaucoma and pseudotumor cerebri.[1] Inhibits water permeability of membranes by interacting with aquaporins	LOPAC
-0.0707968	0.677129	Loratadine	a non-sedating histamine H1-receptor antagonist. Shown to inhibit the two-pore domain potassium channel K2P18.1 (also called TRESK or KCNK18)	FDA
-0.0705646	0.618966	Artemesinin	Artemisinin (Qinghaosu), a sesquiterpene lactone, is a highly active anti-malarial (falciparum malaria) drug. Artemisinin is also an anthelmintic (parasitic worm) effective against the blood fluke, schistosomiasis.	Natural
-0.0696276	0.793469	Picrotoxin	GABAA receptor antagonist; binds to the GABA receptor-linked Cl− channel.	LOPAC
-0.069368	0.660192	Bexarotene	a highly selective retinoid X receptor (RXR) agonist.	LOPAC
-0.0693414	0.723885	Etodolac	Non-steroidal anti-inflammatory compound that is a non-selective inhibitor of COX-1 and COX-2.	LOPAC
-0.0692872	0.665753	Meclofenamate·Na	the sodium salt form of meclofenamate, an anthranilic acid and non-steroidal anti-inflammatory drug (NSAID) with anti-inflammatory, antipyretic and analgesic activities.	FDA
-0.068454	0.606409	(±)-2-Amino-4- phosphonobutyric acid	mGluR4 and mGluR6 metabotropic glutamate receptor agonist.	LOPAC
-0.0676562	0.623526	Oxaprozin	Nonsteroidal anti-inflammatory drug	FDA
-0.0674288	0.67941	GABApentin	an antiepileptic drug, which is a structural analog of γ-aminobu-tyric acid (GABA)	LOPAC
-0.0673887	0.423305	Karakoline	Ganglioblocker; nicotinic receptor antagonist.	Natural
-0.0673272	0.483502	Naringenin-7-O-glucoside		Natural
-0.0669304	0.651739	Paliperidone	an atypical antipsychotic; active metabolite of risperidone.	LOPAC
-0.066734	0.526886	Aminolevulinic Acid·HCl	Intermediate in heme biosynthesis.	FDA
-0.0666802	0.606409	5-Fluoroindole-2- carboxylic acid	an antagonist of the glycine site within the NMDA (N-methyl-D-aspartate) receptor complex	LOPAC
-0.0665859	0.638953	Chartreusin	Antitumor antibiotic which induces single-strand scission in DNA in the presence of reducing agents.	Natural
-0.0651667	0.457599	Beclomethasone	an anti-inflammatory glucocorticoid.	LOPAC
-0.0649735	0.606201	Letrozole	a third generation nonsteroidal aromatase inhibitor. It is a competitive inhibitor of the aromatase enzyme system and thus inhibits the conversion of androgens to estrogens.	FDA
-0.0644848	0.659111	UK 14,304	an α2-adrenoceptor agonist.[3] UK 14,304 inhibits hormone-sensitive lipase (HSL) activity and suppresses lipogenesis in adipose tissue	LOPAC
-0.0643731	0.676358	Bakuchiol	acts as an antioxidant inhibitor of protein tyrosine phosphatase 1B (PTP1B), and as an inhibitor of mitochondrial lipid peroxidation and inducible nitric oxide synthase (iNOS; NOS II) expression. Bakuchiol is also a DNA polymerase inhibitor which shows antimicrobial, anti-inflammation, anti-tumor, immunosuppressive, and hepatoprotective effects, as well as hypoglycemic and cytotoxic activity	Natural
-0.063634	0.655257	Dantrolene·Na	a postsynaptic muscle relaxant that lessens excitation-contraction coupling in muscle cells. It achieves this by inhibiting Ca2+ ions release from sarcoplasmic reticulum stores by antagonizing ryanodine receptors.	FDA
-0.062929	0.715492	Quinapril·HCl	a short-acting angiotensin converting enzyme (ACE) inhibitor.	FDA
-0.0624519	0.729821	N,N-Dihexyl-2-(4- fluorophenyl) indole- 3-acetamide	High affinity ligand for glial mitochondrial benzodiazepine receptors; stimulates neurosteroid biosynthesis; does not bind GABAA receptors	LOPAC
-0.0612068	0.825965	1-(5-Isoquinolinyl sulfonyl)-2- methylpiperazine diHCl	Inhibitor of cyclic nucleotide dependent protein kinase (PKA) and protein kinase C.	LOPAC
-0.0595202	0.649311	SR 27897 hydrate	a potent, selective antagonist of the Cholecystokinin (CCK) receptor CCK1. SR-27897 blocks the elevation of leptin levels in the CNS following injection of CCK-8 peptide, and causes an increase in food intake in rats.	LOPAC
-0.0587527	0.840934	Metergoline	Antagonist at 5-HT1, 5-HT2, and 5-HT7 serotonin receptors; analgesic; antipyretic.	LOPAC
-0.0584383	0.682991	CGP 55845 hydrochloride	Potent and selective GABAB antagonist	LOPAC
-0.0553666	0.621152	Mometasone Furoate	an anti-inflammatory glucocorticoid.	FDA
-0.054083	0.6086	Mirtazapine	a noradrenergic and specific serotonergic antidepressant (NaSSA). Mirtazapine agonizes selective adrenergic and serotonergic receptors so that both NE release and 5-HT1A mediated serotonergic signaling are increased.	FDA
-0.0535943	0.563099	Dicyclomine·HCl	Competitive muscarinic acetylcholine receptor antagonist.	FDA
-0.0514445	0.502962	Condelphine	Nicotinic acetylcholine receptor antagonist.	Natural
-0.0510932	0.321625	Thiotepa	alkylating agent	FDA
-0.0507569	0.367769	Tolterodine Tartrate	competitive muscarinic receptor antagonist	FDA
-0.0499676	0.569412	Hydrocortisone Acetate	an adrenocortical steroid	FDA
-0.0497594	0.509631	Bisoprolol Fumarate	competitively blocks catecholamine (adrenaline) stimulation of β1 adrenergic receptors (adrenoreceptors)	FDA
-0.0496444	0.638499	Mitoxantrone·2HCl	a cytostatic anthracenedione that intercalates in DNA and increases the incidence of double-strand breaks by stabilizing the cleavable complex of topoisomerase II and DNA. Mitoxantrone also displays broad immunosuppressive activity inhibiting proliferation of all classes of lymphocytes and inducing apoptosis of antigen-presenting T cells. It used clinically as a chemotherapeutic agent against leu…	FDA
-0.0484857	0.634019	SR 142948A	a potent neurotensin receptor antagonist that affects the expression of c-Fos and has properties of antipsychotic agent.[1] It blocks hypothermia and analgesia induced by neurotensin. It blocks the increase in the concentration of Ca+2 induced by the activation of phospholipase C in CHO cell model	LOPAC
-0.0481716	0.62086	N-Ethylmaleimide	Augments currents from native M-channels in sympathetic neurons and acts as an opener for KCNQ2, KCNQ4 and KCNQ5 channels. Sulfhydryl alkylating agent that inactivates NADP-dependent isocitrate dehydrogenase and many endonucleases.	LOPAC
-0.0481521	0.408163	Lapiferine	Lapiferine is a carothane complex ester, from plants of the Umbelliferae family.	Natural
-0.0466473	0.419002	Amsacrine hydrochloride	a DNA topoisomerase II inhibitor.	LOPAC
-0.0463051	0.606584	(+/-)-Thalidomide	selectively inhibits biosynthesis of tumor necrosis factor α (TNF-α). It also functions as an inhibitor of angiogenesis, an immunosuppressive agent, a sedative and a teratogen.	LOPAC
-0.0461071	0.546546	3-Aminopropyl phosphonic acid	GABAB receptor agonist; antagonist of basal prolactin secretion.	LOPAC
-0.0454158	0.662709	Tropicamide	antimuscarinic drug that produces short acting mydriasis	LOPAC
-0.0440296	0.503612	Cefazolin·Na	antibiotic	FDA
-0.0437011	0.432951	Cisplatin (Cis-Diamineplatinum(Ii) Dichloride )	Potent platinum-based antineoplastic agent. Forms cytotoxic adducts with the DNA dinucleotide d(pGpG), inducing intrastrand cross-links.	FDA
-0.0434778	0.526662	Salsoninol·HBr	the condensation product of acetaldehyde and dopamine. Salsolinol is a potential neurotoxin suspected to contribute to alcohol abuse. It appears that salsolinol excites the ventral tegmental area (VTA) dopamine neurons indirectly by activating μ-opioid receptors (MORs), which inhibit GABA neurons in the VTA.	Natural
-0.0434578	0.694939	GW5074	a cRaf1 kinase inhibitor	LOPAC
-0.0432144	0.582396	SirReal2	a potent and selective inhibitor of Sirt2	LOPAC
-0.04241	0.46131	1,3-Dipropyl-8-p- sulfophenyl xanthine	Water soluble adenosine receptor antagonist with slight selectivity for A1 receptors.	LOPAC
-0.0419901	0.755942	Alclometasone dipropionate	a glucocorticoid receptor agonist that mimics the metabolic, anti-inflammatory, immunosuppressive, antipruritic, and vasoconstrictive effects of natural glucocorticoids.	LOPAC
-0.0405265	0.728865	Quipazine, 6-nitro- , maleate	Non-selective serotonin receptor agonist.	LOPAC
-0.0403557	0.822718	Sodium Phenylbutyrate	Sodium phenylbutyrate is a histone deacetylase inhibitor.	FDA
-0.0401734	0.431863	Heteratisine	organic heterobicyclic compound and an organonitrogen heterocyclic compound.	Natural
-0.0398529	0.666781	Kanamycin Sulfate	an aminoglycosidic antibiotic with broad-spectrum inhibition of the growth of Gram-positive and Gram-negative bacteria and mycoplasmas in cell culture	FDA
-0.039846	0.540931	Biperiden·HCl	non-selective muscarinic receptor antagonist. It is used for the adjunctive treatment of all forms of Parkinson′s Disease	FDA
-0.0387002	1.04646	Phenelzine sulfate salt	Non-selective MAO-A/B inhibitor.	LOPAC
-0.0382003	0.616658	Tomoxetine hydrochloride	Norepinephrine uptake blocker.	LOPAC
-0.0378814	0.598458	Colistin Sulfate	Binds to lipids on the cell cytoplasmic membrane of Gram-negative bacteria and disrupts the cell wall integrity	FDA
-0.0374823	0.629092	Zofenopril calcium	a long-lasting, lipophilic ACE inhibitor. Zofenopril is also an inhibitor of PEPT2, the predominant peptide transporter in kidney and choroid plexus.	LOPAC
-0.0369284	0.278473	Imperialine	an alkaloid found in the bulbs of species of the genus Fritillaria	Natural
-0.0363517	0.664249	L-Cysteinesulfinic Acid	synthesized by the conversion of sulfur to sulfinic acid in cysteine by the enzyme cysteine dioxygenase (CDO).[1][2] CSA is a putative excitatory amino acid (EAA) with neurotransmitter functionality. It also regulates cardiovascular functions	LOPAC
-0.0357706	0.593673	Phenylephrine	α1-adrenoceptor agonist.	FDA
-0.0356995	0.777729	L-alpha-Methyl DOPA	aromatic-amino-acid decarboxylase inhibitor	LOPAC
-0.035548	0.747497	Morin	a flavonoid with antioxidant properties. It has been shown to protect cells against oxygen radical damage.[2] Morin not only scavenges oxyradicals, but also moderately inhibits xanthine oxidase, a free-radical generating enzyme; Morin has been reported to inhibit rat brain phospha­tidyl­inositol­phos­phate kinase activity in vitro and in vivo	LOPAC
-0.0352483	0.922315	Quinolinic acid	Inhibits glucose synthesis.	LOPAC
-0.0347842	0.591411	Tirapazamine	Under hypoxic conditions, tirapazamine is a potent cytotoxic agent that induces apoptosis by inducing breaks in single and double stranded DNA, as well as chromosomal breaks. The compound sensitizes cells to other ionizing radiation and other cytotoxic agents like cisplatin.	LOPAC
-0.0346768	0.539394	Methscopolamine Bromide ((−)-Scopolamine Methyl Bromide)	an anti-muscarinic and cholinolytic alkaloid that inhibits parasympathetic-cholinergic system	FDA
-0.0346626	0.681897	L-Mimosine from Koa hoale seeds	L-Mimosine is a plant amino acid and potential inhibitor of the cell cycle giving rise to growth arrest in G1-phase.[1] It is an iron chelator that inhibits DNA replication in mammalian cells.[4] L-Mimosine has been shown to promote apoptosis in xenotransplanted human pancreatic cancer.[2] L-Mimosine stabilizes hypoxia inducible factor 1 (HIF-1) and stimulates the expression of B-cell translocati…	LOPAC
-0.0343615	0.730481	Dipropyldopamine hydrobromide	Dopamine receptor agonist	LOPAC
-0.0337844	0.515769	Indinavir sulfate salt hydrate	an antiviral HIV protease inhibitor	LOPAC
-0.0334697	0.828718	JNJ-40418677	a γ-secretase modulator that selectively blocks γ-site cleavage of the APP without affecting processing of Notch	LOPAC
-0.0325686	0.818755	p-MPPF dihydrochloride	Selective 5-HT1A serotonin receptor antagonist	LOPAC
-0.0320037	0.225148	Tschimganidin	Tschimganidine is a terpenoid complex ester, from plants of the Umbelliferae family. Terpenoids found in the umbelliferae family act as agonists/antagonists for ER(alpha) and Erbeta	Natural
-0.0316607	0.662419	Hydrocortisone	drug for the treatment of type 2 diabetes. It is a highly selective KATP channel antagonist Mitiglinide is a hypoglycemic agent that closes adenosine triphosphate (ATP)–sensitive potassium channels (KATP channel s) in the pancreatic β-islet cells.	LOPAC
-0.0313213	0.628054	Arcaine sulfate	Potent antagonist at the polyamine site of the NMDA glutamate receptor.	LOPAC
-0.0305988	0.56278	UNC0379 trifluoroacetate salt	first substrate-competitive inhibitor of the lysine methyltransferase SETD8, the only known methyltransferase that catalyzes monomethylation of histone H4 lysine 20 (H4K20)	LOPAC
-0.0302668	0.7473	Disopyramide phosphate	Class IA antiarrhythmic; sodium channel blocker	LOPAC
-0.0301312	0.802222	Pemetrexed disodium heptahydrate	Inhibits thymidylate synthase (TS), 421 dihydrofolate reductase (DHFR), and glycinamide ribonucleotide formyltransferase (GARFT)	LOPAC
-0.0298216	0.606201	Zafirlukast	a potent subtype specific cysteinyl leukotriene type 1 receptor (CysLT1) antagonist; antiasthmatic	FDA
-0.0297135	0.678772	Furosemide	diuretic that strongly affects renal tubular action by increasing renal blood flow; antihypertensive. Furosemide can block the Na+/K+/2Cl- co-transporter in the ascending thick loop of Henle. It can enhance the synthesis of intrarenal prostaglandin.[1] It enhances its ototoxicity in animals when used along with kanamycin.[2] Furosemide is linked with thiamine insufficiency in individuals with hea…	LOPAC
-0.0288491	0.298757	L(-)- Norepinephrine bitartrate	a natural neurotransmitter and hormone that is biosynthesized from dopamine by dopamine β-hydroxylase. It is an agonist of adrenergic receptors	LOPAC
-0.0284499	0.615385	Deferasirox	iron chelator used clinically for reduction of chronic iron overload in diseases such as β-thalassemia.	FDA
-0.0281815	0.57825	Bendroflumethiazide	thiazide diuretic	FDA
-0.0277411	0.603004	Epinastine hydrochloride	a non-sedating H1 histamine receptor antagonist.	LOPAC
-0.0275735	0.367769	Telithromycin	a ketolide antibiotic, the first to enter clinical use. It is used to treat mild to moderate respiratory infections. Telithromycin binds to the subunit 50S of the bacterial ribosome, interfering with bacterial protein synthesis.	FDA
-0.0274884	0.606733	Dalfampridine (4-Aminopyridine)	4-Aminopyridine (4-AP) blocks the voltage-dependent potassium channels	FDA
-0.0266189	0.478753	Amiodarone hydrochloride	Non-selective ion channel blocker with broad fungicidal activity. Amiodarone induces an immediate influx of Ca2+ in Saccharomyces cerevisiae, followed by mitochondrial fragmentation and cell death.	LOPAC
-0.0262921	0.771924	Mitiglinide calcium	drug for the treatment of type 2 diabetes. It is a highly selective KATP channel antagonist Mitiglinide is a hypoglycemic agent that closes adenosine triphosphate (ATP)–sensitive potassium channels (KATP channel s) in the pancreatic β-islet cells.	LOPAC
-0.0262723	0.570246	Cloxacillin·Na	semisynthetic beta-lactamase resistant penicillin antibiotic with antibacterial activity	FDA
-0.0259107	0.585013	Mebendazole	a benzimidazole carbamate derivative, which is an anthelmintic agent	FDA
-0.0253497	0.765528	LDN-27219	a revesible inhibitor of transglutaminase 2 (TG2) that binds to the GTP binidng site of the enzyme and inhbits activity	LOPAC
-0.0248538	0.555576	Desonide	a synthetic glucocorticosteroid for topical use, with anti-inflammatory activity. Desonide binds to glucocorticoid receptors in the cytoplasm, and the ligand-receptor complex is translocated as a homodimer into the nucleus, where transcription activation via glucocorticoid response elements within glucocorticoid-responsive genes occur	FDA
-0.0248277	0.729162	Nefiracetam	a pyrrolidonetype nootropic agent with various pharmacologic as well as cognition enhancing effects. In amygdala-kindled seizures, nefiracetam inhibits both electroencephalographic and behavioral seizures. NEF has a distinct anticonvulsant spectrum.	LOPAC
-0.0236502	0.482496	Disulfiram	Alcohol dehydrogenase inhibitor	FDA
-0.0222639	0.48486	Erythromycin	Mode of Action: Erythromycin acts by inhibiting elongation at the transpeptidation step, specifically aminoacyl translocation from the A-site to P-site by binding to the 50s subunit of the bacterial 70s rRNA complex. Antimicrobial Spectrum: This product acts against both gram-negative and gram-positive bacteria.	FDA
-0.0217736	0.65338	Nilotinib	inhibits the kinases BCR-ABL, KIT, LCK, EPHA3, EPHA8, DDR1, DDR2, PDGFRB, MAPK11 and ZAK. Structurally related to imatinib	FDA
-0.0195148	0.352617	Propylthiouracil	inhibits the production of new thyroid hormone in the thyroid gland. [2] It acts by inhibiting the enzyme thyroid peroxidase	FDA
-0.0191385	0.790187	S(+)-Ibuprofen	the enantiomer associated with the anti-inflammatory action of ibuprofen, which is widely used as a nonsteroidal anti-inflammatory drug	LOPAC
-0.0186994	0.628471	Minocycline	a broad spectrum antibiotic with bacteriostatic function.[1][3] Minocycline has anti-inflammatory properties.[1][2] Minocycline inhibits lipopolysaccharide mediated inflammatory cytokine tumour necrosis factor (TNF-α) secretion by macrophages. Minocycline inhibits macrophage proliferation in a dose dependent manner.[1] Minocycline inhibits neuroinflammation in pre-plaque of Alzheimer′s disease-li…	FDA
-0.0179778	0.787073	Sodium Oxamate	an inhibitor of gluconeogenesis and glycolysis. It is a structural analog of pyruvate, inhibits L(+)-lactate dehydrogenase and derails the entire gluconeogenic pathway	LOPAC
-0.0176817	0.622125	Bendamustine hydrochloride	alkylating agent used alone and in combination with other antineoplastic agents in the treatment of chronic lymphocytic leukemia and refractory forms of non-Hodgkin lymphoma	LOPAC
-0.0173973	0.803935	Diphenylene iodonium chloride	A potent and reversible inhibitor of nitric oxide synthetase from macrophages and endothelial cells. Also inhibits other flavoenzymes such as neutrophil NADPH oxidase.	LOPAC
-0.0166918	0.665986	Pantoprazole	Gastric proton pump inhibitor	FDA
-0.0166006	0.905074	Y-27632 dihydrochloride	highly potent, cell-permeable, selective ROCK (Rho-associated coiled coil forming protein serine/threonine kinase) inhibitor	LOPAC
-0.0164514	0.619941	L-165,041	PPARβ (PPARδ) selective agonist.	LOPAC
-0.0152623	0.606556	Itraconazole	Itraconazole inhibits cytochrome P-450-dependent enzymes which results in the inhibition of ergosterol synthesis. It does so by interacting with 14-α demethylase, which is a cytochrome P-450 enzyme necessary to convert lanosterol to ergosterol. Ergosterol is a crucial compenent of fungal cell membranes. Therefore, it′s inhibition results in increased cellular permeability causing leakage of cellu…	FDA
-0.0149874	0.747839	(+)-MK-801 hydrogen maleate	Highly potent and selective non-competitive NMDA glutamate receptor antagonist that acts at the NMDA receptor-operated ion channel as an open channel blocker.	LOPAC
-0.0140482	0.358879	ATPA	Selective kainate receptor agonist.	LOPAC
-0.0136414	0.602227	Aphidicolin	an antibiotic, a potent antiviral and antimitotic agent and DNA polymerase inhibitor.	Natural
-0.0136291	0.382749	Tetrandrine	classified under the bisbenzylisoquinoline alkaloid family of compounds extracted from Stephania tetrandra	Natural
-0.0134017	0.635233	5-Hydroxy-L- tryptophan	Immediate precursor of serotonin; L-aromatic amino acid decarboxylase substrate.	LOPAC
-0.0129822	0.707245	cis(Z)-Flupenthixol dihydrochloride	Antipsychotic; neuroleptic agent; dopamine receptor antagonist. cis-(Z)-Flupenthixol dihydrochloride (FLU) is used to treat schizophrenia and anxiolytic and depressive disorders[5] Dopamine D1 plays a major role in lung fluid homeostasis.[2] It controls the airway smooth muscle tone by producing adenylyl cyclase/cAMP, that would favor airway relaxation in asthmatics.[2] Dopamine in the lung, serv…	LOPAC
-0.0123213	0.446346	Dubinidine	An anticonvulsant which reduces motor activity, enhances the effects of alcohol, ether and barbiturates.	Natural
-0.0101057	0.652396	Roslin 2	a p53 reactivator that disrupts the FAK and p53 interaction, and reactivates transcriptional activity of p53 with p21, Mdm-2 and Bax transcriptional targets. Roslin 2 decreases viability and clonogenicity of cancer cells, and inhibits tumor growth.	LOPAC
-0.00986919	0.57225	N-Phenyl anthranilic acid	derivative of anthranilic acid. It acts as a parent skeleton for the synthesis of several non-steroidal anti-inflammatory drugs. It has a role as a membrane transport modulator. It is a secondary amino compound and an aminobenzoic acid. It derives from an anthranilic acid.	LOPAC
-0.00940277	0.573551	BML-266	SIRT2 inhibitor	Epigenetic
-0.0080646	0.476206	Homobutein	a sulfhydryl-containing amino acid, synthesized from methionine. It is a non-essential, non-proteinogenic amino acid.	Natural
-0.0080646	0.573564	Friedelin	Major triterpene constituent of cork	Natural
-0.00640303	0.548806	Dutasteride	a potent dual inhibitor of 5α-reductase isoenzymes types 1 and 2 (IC50 = 6 nM 5-AR1; 7 nM 5-AR2). Dutasteride blocks testosterone conversion to dihydrotesterone, and is used clinically for treating benign prostatic hyperplasia (BPH).	FDA
-0.00477272	0.557833	Dapsone	a synthetic antibiotic belonging to the class of sulfonamides, which show inhibitory action against most gram-positive and many gram-negative organisms	FDA
-0.00462182	0.829479	2,3-Dimethoxy-1,4- naphthoquinone	produced from Lawsonia inermis, is an orange dye. It belongs to the class of naphthoquinone dyes. 2-Hydroxy-1,4-naphthoquinone is used to dye hair and to color textiles. It has antibacterial, antifungal, anti-inflammatory, antiviral and antineoplastic properties. 2-Hydroxy-1,4-naphthoquinone inhibits tumor cell growth.[3] It stimulates the production of reactive oxygen species (ROS).	LOPAC
-0.00258529	0.462052	L-Aspartic acid	L-aspartic acid is the L-enantiomer of aspartic acid. It has a role as an Escherichia coli metabolite, a mouse metabolite and a neurotransmitter.	LOPAC
-0.000583607	0.599586	Dihydroouabain	Cardiac glycoside; an inhibitor of the sodium-potassium pump.	LOPAC
-0.000236802	0.631579	Ketotifen Fumarate	H1 histamine receptor antagonist.	FDA
-0.000129764	0.640149	Nilutamide	an antiandrogen used in the treatment of prostate cancer.	FDA
0.000584627	0.78921	(+-)-alpha-Methyl- (4-carboxyphenyl) glycine	also known as MCPG, is a competitive metabotropic glutamate receptor antagonist	LOPAC
0.000952898	0.565486	Arbidol hydrochloride	a broad-spectrum antiviral that has demonstrated activity against a number of enveloped and non-enveloped viruses, and is used clinically to treat influenza. Arbidol inhibits viral entry into host cell and stimulates immune response. Arbidol inhibits fusion between the viral capsid and the cell membrane of the target cell, thus preventing viral entry.	LOPAC
0.00235207	0.622155	Cysteamine·HCl	The free thiol cysteamine depletes cystinotic leukocytes and other cells of cystine, whose accumulation is considered the cause of organ damage in cystinosis. Cysteamine cleaves the disulfide bond with cystine to produce molecules that can escape the metabolic defect in cystinosis and cystinuria	FDA
0.00350839	0.587671	Indinavir	an antiviral HIV protease inhibitor	FDA
0.00453168	0.516051	Ambrisentan	an endothelin receptor antagonist used in the treatment of pulmonary arterial hypertension (PAH)	FDA
0.00455709	0.61615	Valproate·Na	an anticonvulsant and mood-stabilizing drug. It is used to treat epilepsy and bipolar disorder.[1] Valproic acid helps to repress the Warburg effect and the development of tumor in neuroblastoma.	FDA
0.00469982	0.47488	Isovitexin	Phytochemical found in medicinal herbs. Antioxidant.	Natural
0.00469982	0.601626	(-)-Isoreserpine	isoreserpine promoted the degradation of intracellular β-catenin by up-regulation of Siah-1 in HEK293 and HCT116 colon cancer cells.	Natural
0.00616782	0.646398	Serotonin hydrochloride	Endogenous 5-HT receptor agonist	LOPAC
0.00736509	0.697558	Leflunomide	Immunosuppressive; inhibits T and B cell proliferation. Activity is attributed mainly to its metabolite, a malononitrile derivative, which is believed to inhibit dihydroorotate dehydrogenase (in the de novo pyrimidine synthesis pathway) as well as several protein tyrosine kinases.	FDA
0.00806224	0.546612	Calcimycin	Ionophore highly selective for Ca2+. Potentiates responses to NMDA but not quisqualate.	LOPAC
0.00949112	0.595449	Desogestrel	progestational steroid developed for utilization in oral contraceptives	FDA
0.00972086	0.644912	Cefmetazole sodium salt	disrupts the synthesis of the peptidoglycan layer of bacterial cell walls which is responsible for cell wall structural integrity. Peptidoglycan synthesis is facilitated by transpeptidases known as penicillin-binding proteins (PBPs). PBPs bind to the D-Ala-D-Ala at the end of muropeptides (peptidoglycan precursors) to crosslink the peptidoglycan. Cefmetazole mimics the D-Ala-D-Ala site, thereby c…	LOPAC
0.0120854	0.592269	Isoguvacine hydrochloride	GABAA receptor agonist.	LOPAC
0.0121861	0.810603	Olopatadine	a histamine H1 receptor antagonist and mast cell stabilizer	FDA
0.0124252	0.791209	Capecitabine	an anti-cancer drug, a prodrug of doxifluridine, metabolized to 5-fluorouracil at the tumor site. The activation of capecitabine follows a pathway with three enzymatic steps and two intermediary metabolites, 5′-Deoxy-5-fluorocytidine (5′-DFCR) and 5′-Deoxy-5-fluorouridine (5′-DFUR), to form 5-fluorouracil.	LOPAC
0.0150312	0.715795	MRS 2159	P2X1 purinoceptor antagonist.	LOPAC
0.0161835	0.329931	IKK-16 dihydrochloride	a selective inhibitor of IKB kinase (IKK), part of the upstream NF-KB signal transduction cascade involved in the cellular response to inflammation.	LOPAC
0.0163487	0.70324	Progesterone	Induces maturation and secretory activity of the uterine endothelium; suppresses ovulation	FDA
0.0168878	0.659415	Cephalothin sodium salt	the sodium salt form of cephalothin, a semisynthetic, beta-lactam, first-generation cephalosporin antibiotic with bactericidal activity. Cephalothin binds to and inactivates penicillin-binding proteins (PBP) located on the inner membrane of the bacterial cell wall	LOPAC
0.016977	0.269928	Valproic acid hydroxamate	HDAC inhibitor	Epigenetic
0.0170078	0.616057	Hydroxylamine hydrochloride	MAO inhibitor; inhibits platelet aggregation	LOPAC
0.0174972	0.450955	Pseudopelletierine·HCl	main alkaloid derived from the root-bark of the pomegranate tree	Natural
0.0183759	0.414555	Everolimus	Everolimus, the 40-O-(2-hydroxyethyl) derivative of rapamycin (sirolimus), is a potent and selective inhibitor of mechanistic target of rapamycin (mTOR). Everolimus is selective for the mTORC1 protein complex. Everolimus exhibit potent immunosuppressive and anticancer activities.	FDA
0.0195339	0.467466	Mefloquine·HCl	Blocker of gap junction channels Cx36 and Cx50	FDA
0.0203112	0.607348	Fenspiride hydrochloride	Bronchodilator with anti-inflammatory properties. Inhibits mucus secretion and reduces the release of tachykinins at a prejunctional level by its anti-muscarinic action. It also may be an antagonist at α adrenergic and H1 histamine receptors.	LOPAC
0.0217732	0.378812	Cefuroxime·Na	belongs to a class of drugs known as cephalosporin antibiotics. It works by stopping the growth of bacteria	FDA
0.022152	0.372741	Ferutinin	An ERα (estrogen receptor) agonist; phytoestrogen	Natural
0.022152	0.692368	Khellin	A vasodilator that also has bronchodilatory action. It has been employed in the treatment of angina pectoris, in the treatment of asthma, and in conjunction with ultraviolet light A, has been tried in the treatment of vitiligo.	Natural
0.0224199	0.813945	N6-Cyclohexyl adenosine	Selective A1 adenosine receptor agonist.	LOPAC
0.0224393	0.405903	Conessine	a plant steroid alkaloid that acts as a potent and specific antagonist of histamine H3 receptors (Ki = 5.37 and 24.5 nM for human and rat receptors, respectively). Conessine is 1860-fold selective for H3 over H4 and does not bind to H1 or H2 receptors. The molecule also binds to the human α2C4 adrenergic receptor (pKi = 7.98).	Natural
0.0224393	0.667978	Cephadrine	a semi-synthetic cephalosporin that inhibits the last stage of bacterial cell wall synthesis by binding to certain penicillin-binding proteins (PBPs), such as PBP3, which results in cell lysis	Natural
0.0226345	0.698588	Pioglitazone·HCl	a PPARγ agonist and thiazolidinedione (TZD) anti-diabetic. Pioglitazone is a selective agonist of the nuclear receptor peroxisome proliferator-activated receptor γ (PPAR-γ) and to a lesser extent PPAR-α.	FDA
0.0235565	0.520011	Paclitaxel (Taxol)	a potent anti-neoplastic and anti-mitotic taxane drug, which binds to the N-terminus of β-tubulin and and stabilizes microtubules arresting the cell cycle at the G2/M phase. The microtubule damage induces apoptosis through a JNK-dependent pathway followed by a JNK-independent pathway, perhaps related to the activation of protein kinase A (PKA) or of Raf-1 kinase, resulting in phosphorylation of B…	FDA
0.0245033	0.808205	Nemadipine-A	Cell-permeable L-type calcium channel protein inhibitor. Antagonizes α1-subunit of L-type calcium channel. Sensitizes cancer cells to TRAIL-induced apoptosis. 1,4-dihydropyridine (DHP) analog.	LOPAC
0.025628	0.559932	Malathion	acetylcholinesterase inhibitor	FDA
0.0258422	0.627858	NBI 27914	NBI 27914 is a CRF1 corticotropin-releasing factor receptor antagonist.	LOPAC
0.0261566	0.623996	Apigenin	A plant flavonoid that has been found to inhibit cell proliferation by arresting the cell cycle at the G2/M phase. Inhibition of growth through cell cycle arrest and induction of apoptosis appear to be related to induction of p53. Inhibits PMA-mediated tumor promotion by inhibiting protein kinase C and the resulting suppression of oncogene expression. It has also been reported to inhibit topoisom…	LOPAC
0.0263277	0.576985	5-Aminovaleric acid hydrochloride	a methylene homologue of gamma-aminobutyric acid (GABA) and functions as a weak GABA agonist	LOPAC
0.0273329	0.377407	3- Morpholinosydnon imine hydrochloride	Liberates nitric oxide (NO) spontaneously when in solution, activating guanylyl cyclase and causing an increase in cyclic-GMP. This product is a vasodilator and inhibits platelet aggregation. Using molecular oxygen, it generates both superoxide anion and nitric oxide that spontaneously form peroxynitrite.	LOPAC
0.0275466	0.667672	Ethosuximide	an anticonvulsant drug[2] and an antagonist for T-type calcium channel. It is known to prevent spike wave discharges, characterized in absence seizures	LOPAC
0.0282744	0.635718	Ibudilast	Phosphodiesterase IV (PDE4) inhbitor. Inhibits platelet aggregation. Anti-asthma drug.	LOPAC
0.0284024	0.436412	Luteolin-3',7-diglucoside	Hydroxylated flavone derivative, a strong antioxidant and radical scavenger. Suggested to play a role in prevention of cancer, possibly via the inhibition of fatty acid synthase activity.	Natural
0.0284024	0.553632	(+)-Muscarine chloride	Prototype muscarinic acetylcholine receptor agonist; active enantiomer.	Natural
0.028731	0.604891	(+)-Hydrastine	inhibition of tyrosine hydroxylase in PC-12 cells; inhibition of several cytochrome P450 (CYP) enzymes	LOPAC
0.0292056	0.757216	Memantine hydrochloride	NMDA-receptor antagonist	LOPAC
0.0301752	0.300054	CCT137690	potent, orally bioavailble, pan aurora kinase inhbitor	LOPAC
0.031608	0.881465	PD-407824	a Wee1/Chk1 inhibitor	LOPAC
0.0320416	0.714269	Tranylcypromine Hemisulfate	Non-selective MAO-A/B inhibitor	FDA
0.0329433	0.570898	Amitriptyline·HCl	Tricyclic antidepressant; inhibits the norepinephrine and serotonin transporters with Kis of 100 nM and 14.7 nM, respectively; high in vitro affinity for α1-adrenoceptors, serotonin and muscarinic acetylcholine receptors.	FDA
0.0329571	0.867399	RS504393	Highly selective CCR2 chemokine receptor antagonist	LOPAC
0.0334217	0.599307	Aminophylline ethylenediamine	Non-selective phosphodiesterase (PDE) inhibitor. Antiepileptic drug	LOPAC
0.0335027	0.527371	S(-)-Atenolol	β1-Adrenergic receptor antagonist; active enantiomer of atenolol.	LOPAC
0.0338789	0.755545	1,10- Diaminodecane	1,10-Diaminodecane and 1,12-diaminododecane block NMDA receptor currents by an open channel mechanism	LOPAC
0.0349088	0.417335	Acebutolol·HCl	β-adrenergic receptor blocker	FDA
0.0349559	0.326446	Probenecid	a uricosuric agent, which increases uric acid removal in the urine[1] and reduces urate reuptake.[2] It also reduces the renal tubular excretion of many other drugs and increases their plasma concentration. The inhibitory action of probenecid is mediated by organic anion transporters. It is found useful for the treatment of gout.[2] Probenecid is responsible for the rise in the levels of neuroche…	FDA
0.0351247	0.584514	Methyl Aminolevulinate·HCl	photosentizer reagents for photodynamic therapy to treat conditions such as Acne vulgaris and hypertrophic scarring	FDA
0.035305	0.597277	Atropine sulfate	Competitive nonselective antagonist at central and peripheral muscarinic acetylcholine receptors.	LOPAC
0.0353233	0.476897	Lercanidipine hydrochloride hemihydrate	L-type (Cav1.2b) vascular channel antagonist; L-type (Cav1.2a) cardiac channel agonist voltage-dependent and highly lipophylic compound, which exhibits a slower onset and longer duration of action than other calcium channel antagonists; an antihypertensive agent in patients with mild-to-moderate hypertension; more vasoselective than lacidipine and amlodipine.	LOPAC
0.0356116	0.753068	Lamotrigine	anticonvulsant	FDA
0.0356597	0.55939	Capreomycin Disulfate	a cyclic peptide antibiotic that is often grouped with aminoglycosides. It binds across the ribosomal interface involving 23S rRNA helix 69 (H69) and 16S rRNA helix 44 (h44)	FDA
0.0362874	0.611992	Pazopanib·HCl	the hydrochloride salt of a small molecule inhibitor of multiple protein tyrosine kinases with potential antineoplastic activity. Pazopanib selectively inhibits vascular endothelial growth factor receptors (VEGFR)-1, -2 and -3, c-kit and platelet derived growth factor receptor (PDGF-R), which may result in inhibition of angiogenesis in tumors in which these receptors are upregulated	FDA
0.0369886	0.531678	Mannitol	sugar alcohol sweet tastant. Used in sweetness inhibition studies	FDA
0.0377229	0.783542	(-)-Isoproterenol hydrochloride	β-adrenoceptor agonist; increases cytosolic cAMP.	LOPAC
0.0379797	0.87033	Naltrexone hydrochloride	Competitive antagonist for μ, κ, δ, and σ-opioid receptors; has greater oral efficacy and longer duration of action than naloxone.	LOPAC
0.038531	0.627465	Histamine, R(-)- alpha-methyl-, dihydrochloride	Potent, selective H3 histamine receptor agonist which crosses the blood-brain barrier; inhibits histamine synthesis and release.	LOPAC
0.038987	0.8136	NNGH	a potent and cell-permeable inhibitor of matrix metalloproteinase 3 (MMP-3,stromelysin 1, progelatinase)	LOPAC
0.0406547	0.802209	DM 235	potent nootropic agent	LOPAC
0.042393	0.782188	Oxiconazole nitrate	broad-spectrum antifungal agent that inhibits ergosterol biosynthesis. Oxiconazole destabilizes Lanosterol 14-α demethylase (fungal cyctochrome P450 51)	LOPAC
0.0432357	0.568724	R(-)-Isoproterenol (+)-bitartrate	β-Adrenoceptor agonist; increases cytosolic cAMP	LOPAC
0.0463291	0.602493	Oxtriphylline	phosphodiesterase inhibitor, adenosine receptor blocker, and histone deacetylase activator	FDA
0.0472797	0.725517	Ramipril	Angiotensin converting enzyme (ACE) inhibitor.	FDA
0.0480603	0.758458	Oleic Acid	Activates protein kinase C in hepatocytes. Uncouples oxidative phosphorylation. Inhibits 2,4-dinitrophenol−stimulated ATPase. Action reversed by adding serum albumin.	LOPAC
0.0486314	0.554448	Duloxetine·HCl	a dual serotonin/norepinephrine reuptake inhibitor (SNRI), widely used clinically as an antidepressant and anxiolytic.	FDA
0.048816	0.522871	R-(-)- Apomorphine hydrochloride hemihydrate	Nonselective dopamine agonist; causes nausea and emesis.	LOPAC
0.0490878	0.631098	Tryptamine hydrochloride	Vasoactive; may have a neuromodulator function	LOPAC
0.0491105	0.62148	Ampicillin Trihydrate	A β-lactam antibiotic with an amino group side chain attached to the penicillin structure. Penicillin derivative that inhibits bacterial cell-wall synthesis (peptidoglycan cross-linking) by inactivating transpeptidases on the inner surface of the bacterial cell membrane.	FDA
0.0503641	0.551607	Methocarbamol	the exact mechanism of action of methocarbamol was not established, it's postulated to be via a mechanism similar of carbamate, inhibition of acetylcholinesterase at synapses in the autonomic nervous system, neuromuscular junction, and central nervous system.	FDA
0.0504438	0.407229	(±)-6'-Bromolaudanosine	Laudanosine decreases the seizure threshold, and thus it can induce seizures if present at sufficient threshold concentrations; It has been shown to interact with GABA receptors, glycine receptors, opioid receptors, and nicotinic acetylcholine receptors, but not benzodiazepine or muscarinic receptors, which are also involved in epilepsy and other types of seizures.	Natural
0.0504438	0.639392	(+)-Griseofulvin	Antifungal. Mode of action: Disrupts the mitotic spindle structure and inhibits nuclear division.[2] Induces apoptosis in human tumor cell lines	Natural
0.0517558	0.552296	(±)-2-Amino-3- phosphono propionic acid	a metabotropic glutamate receptor agonist; shown to block the amyloid precursor protein (APP) release evoked by glutamate receptor stimulation in neurons of the cortex and hippocampus	LOPAC
0.0520759	0.806351	S-(-)-Carbidopa	Peripheral inhibitor of L-aromatic amino acid decarboxylase. When co-administered with L-DOPA, it prevents extra-CNS conversion to dopamine, thereby increasing CNS concentrations of effective compounds. Selectively cytotoxic to human pulmonary carcinoid and small cell lung carcinoma cells by increasing H2O2 in these cell lines, which are sensitive to reactive oxygen species	LOPAC
0.0539165	0.58613	Meclizine Dihydrochloride	potent histamine H1 receptor antagonist	FDA
0.0541163	0.794791	Pimozide	D2 dopamine receptor antagonist; binds with high affinity to the cloned 5-HT7 receptor; Ca2+ channel antagonist; antipsychotic	FDA
0.0554197	0.565824	Acetylthiocholine chloride	Acetylcholinesterase substrate and nicotinic acetylcholine receptor agonist	LOPAC
0.056279	0.542669	Flutamide	a non-steroidal anti-androgen drug. It consists of a nitroaromatic structure. Flutamide is a potent competitor of testosterone and dihydrotestosterone receptors. It is a potent hepatotoxin	FDA
0.0563755	0.629745	Atropine methyl nitrate	muscarinic acetylcholine receptor	LOPAC
0.0566988	0.689758	Methimazole	a thiourea antithyroid agent that prevents iodine organification, thus inhibiting the synthesis of thyroxine	FDA
0.0567924	0.864469	Naltrindole hydrochloride	Selective non-peptide δ antagonist	LOPAC
0.0570268	0.408556	Saponarin	a natural flavonoid, is known for its antioxidant and hepatoprotective activities. Saponarin is found in diverse plants, including Tinospora cordifolia, which is used in an anti-diabetic drug, Aloe barbadensis, and barley leaves.Saponarin, isolated from Gypsophila trichotoma Wend., showed in vitro and in vivo hepatoprotective and antioxidant activity against CCl₄-induced liver damage. Saponarin p…	Natural
0.0570268	0.651456	Ingenol	Activates PKC (protein kinase C), especially δ and ε; diterpene related to phorbol	Natural
0.0571208	0.574617	4-Amino-1,8- naphthalimide	4-Amino-1,8-naphthalimide sensitizes cells to radiation-induced cell damage and enhances the cytotoxicity of 1-methyl-3-nitro-1-nitrosoguanidine.	LOPAC
0.0571536	0.485287	Miglustat (N-Butyldeoxynojirimycin·HCl)	an inhibitor of glucosyltransferase and α-glucosidases.[1] N-Butyldeoxynojirimycin, also known as misglustat, reduces glycolipid levels by substrate reduction therapy (SRT) and is effectively used for the treatment of glycosphingolipid lysosomal storage disorder, Gaucher disease	FDA
0.0586957	0.668709	Amoxicillin	broad-spectrum, β-lactam antibiotic. It inhibits the cross-linkage between linear peptidoglycan polymer chains that are the major component of both Gram-positive and Gram-negative bacteria.	FDA
0.0590021	0.643041	SID 3712249	SID 3712249 (MiR-544 Inhibitor 1) is an inhibitor of the biogenesis of microRNA-544 (miR-544). MiR-544 represses expression of mTOR, promoting tumor cell survival in a hypoxic environment. Inhibition of miR-544 processing with MiR-544 Inhibitor 1 caused apoptosis in triple negative breast cancer cells in response to hypoxic stress, sensitized their response to 5-fluorouracil, and blocked their gr…	LOPAC
0.0590709	0.699107	Carmofur	Carmofur is a derivative of fluorouracil, an antimetabolite used as an antineoplastic agent.	LOPAC
0.0599533	0.712013	D(−)-2-Amino-5- phosphonopentan oic acid	Anticonvulsant; potent and selective N-methyl-D-aspartate (NMDA) receptor antagonist; active enantiomer of 2-amino-5-phosphonopentanoic acid.	LOPAC
0.0604722	0.462726	Metaxalone	muscle relaxant	FDA
0.0606464	0.804783	BW 723C86	5-HT2B serotonin receptor agonist	LOPAC
0.0611216	0.589098	Fluocinolone Acetonide	corticosteroid	FDA
0.0649238	0.311781	Thiocolchicine	an antimitotic alkaloid and apoptosis inducer that inhibits tubulin polymerization and microtubule assembly.	LOPAC
0.064961	0.59747	YC-1	NO (nitric oxide)-independent activator of soluble guanylyl cyclase.	LOPAC
0.0651299	0.215473	Coumermycin A1	inhibits DNA Gyrase which thereby inhibits cell division in bacteria	Natural
0.0661617	0.786331	(+)-Cyclazocine	σ receptor agonist that is also an agonist at κ opioid receptors and an antagonist at μ opioid receptors.	LOPAC
0.0662829	0.798757	Dihydrokainic acid	a selective inhibitor of the GLT-1 glutamate transporter. At higher concentrations, dihydrokainate is a weak inhibitor of AMPA/kainate glutamic acid receptors.	LOPAC
0.0664799	0.406566	Manool	It has a role as an antineoplastic agent, a plant metabolite and an antibacterial agent	Natural
0.0664799	0.627328	Syrosingopine	antihypertensive agent related to reserpine that was found to potentiate the anticancer effects of the antidiabetic agent metformin and phenformin without harmful effects on normal cells. Syrosingopine was also found to potentiate the anticancer activity of mitochondrial electron transport chain (ETC) inhibitors. Its mechanism of action is currently unknown but may involve inhibition of glycolyti…	Natural
0.0669343	0.619898	Disopyramide	Class IA antiarrhythmic; sodium channel blocker	FDA
0.0670242	0.719948	Rimantadine·HCl	Rimantadine Hydrochloride is the hydrochloride salt form of rimantadine, a cyclic amine and alpha-methyl derivative of amantadine with antiviral activity. Although the exact mechanism of action of rimantadine is not understood, this agent appears to exert its antiviral effect against influenza A virus by interfering with the function of the transmembrane domain of the viral M2 protein, thereby pr…	FDA
0.0671302	0.340909	Tacrolimus (Fk506)	a potent immunosuppressant, neuroprotective and neuroregenerative, and in vitro T cell proliferation blocker; disrupts calcineurin-mediated signal transduction in T lymphocytes and interacts with its FK-506-binding protein-12 (FKBP12)	FDA
0.0674163	0.629407	IMID-4F hydrochloride	Novel imidazoline-based K(ATP) channel blocker.	LOPAC
0.0683081	0.502006	Brompheniramine Maleate	antihistamine drug of the propylamine class	FDA
0.0691215	0.722637	Nomifensine maleate	selective dopamine uptake inhibitor interacting with the dopamine transporter,[3] at a site different from that of cocaine; antidepressant	LOPAC
0.0702836	0.811529	Diltiazem hydrochloride	Blocks slow, or L-type Ca2+ channels; regulates Ca2+ release from intracellular stores in neutrophils; stimulates 1,4-dihydropyridine binding to Ca2+ channels; coronary vasodilator.	LOPAC
0.0706126	0.57637	Lenalidomide	Lenalidomide, a derivative of thalidomide, is an immunomodulatory agent that is approved drug for treatment of multiple myeloma. Lenalidomide is a ligand of ubiquitin E3 ligase cereblon that that induces the enzyme to degrade the Ikaros transcription factors IKZF1 and IKZF3.	FDA
0.0707661	0.718279	Cinaciguat hydrochloride	also known as BAY 58-2667, is a novel activator of guanylate cyclase. It is used in the treatment of acute decompensated heart failure (ADHF). It has been reported that cinaciguat possesses cardiovascular effects	LOPAC
0.0708393	0.437929	Pyr6	a selective inhibitor of calcium release from the endoplasmic reticulum via STIM1/Orai1 mediated, store operated calcium entry (SOCE). Pyr6 blocks SOCE in thapsigargin treated, calcium depleted BRL-2H3 cells (IC50 = 0.49 μM), but has poor activity against carbachol-induced, TRPC3-mediated calcium entry in TRPC3-transfected HEK293 cells (IC50 = 18.46 μM)	LOPAC
0.0715394	0.645719	Maraviroc	a CCR5 chemokine receptor antagonist, and antiretroviral entry inhibitor; inhibits HIV entry by blocking interaction of viral coat protein gp120 with the receptor.	FDA
0.0716596	0.690576	CYM50769	a potent, specific antagonist of the Neuropeptide B and Neuropeptide W receptor, NPBWR1	LOPAC
0.0717002	0.73703	1,5- Isoquinolinediol	potent inhibitor of Poly(ADP-ribose) synthetase which is activated by nitric oxide; neuroprotective agent.	LOPAC
0.0717672	0.576647	N-Acetyl-5- hydroxytryptamine	can act as a shelter to neurons due to its protecting ability against oxidative challenges; can also repress the actions of the transcription factor NF-kappaB; possesses antioxidant and antiaging actions; has protective action against β-amyloid induced neurotoxicity; helps to maintain the optimal fluidity of the biological membranes	LOPAC
0.0737688	0.708904	Mepivacaine·HCl	a local anesthetic that reversibly blocks transient Na+ inward current, as well as the steady-state K+ outward current. (±)-Mepivacaine blocks tandem pore (TASK) and Kv1.5 potassium channels in model systems.	FDA
0.0741768	0.58454	Droperidol	D1, D2 dopamine receptor antagonist; butyrophenone antipsychotic and anti-emetic.	FDA
0.0750489	0.268612	Laudanosine methiodide	a recognized metabolite[1] of atracurium and cisatracurium; shown to interact with GABA receptors, glycine receptors, opioid receptors, and nicotinic acetylcholine receptors,[1][3][4] but not benzodiazepine or muscarinic receptors,	Natural
0.0750489	0.537897	(-)-Asarinin	noncompetitive inhibitor of Δ5-desaturase	Natural
0.0754233	0.793234	Chlormezanone	a non-benzodiazepine that is used in the management of anxiety. It has been suggested for use in the treatment of muscle spasm. Chlormezanone binds to central benzodiazepine receptors which interact allosterically with GABA receptors. This potentiates the effects of the inhibitory neurotransmitter GABA, increasing the inhibition of the ascending reticular activating system and blocking the cortic…	LOPAC
0.0754314	0.582734	TMB-8 hydrochloride	Protein Kinase C inhibitor, which also serves as an intracellular Ca2+ antagonist	LOPAC
0.0778289	0.643881	Paromomycin Sulfate	inhibits the initiation and elongation steps of protein synthesis by binding to 16S ribosomal RNA	FDA
0.0799491	0.379291	Aminobenztropine	High affinity muscarinic ligand that has been used for affinity purification of muscarinic cholinergic receptors.	LOPAC
0.0816166	0.635899	Medroxyprogesterone Acetate	Medroxyprogesterone acetate is a synthetic progestational drug utilized as a contraceptive. It is also used as a medication for the treatment of hormone-dependent cancers, such as breast cancer	FDA
0.0822281	0.791854	CNQX disodium	potent, competitive AMPA/kainate receptor antagonist.[2] It is a quinoxaline derivative and also an antagonist for non-N-methyl-d-aspartate (non-NMDA) glutamate receptor. CNQX mediates depolarization thalamic reticular nucleus via α-amino-3-hydroxy-5-methylisoxazole-4-propionic acid receptors (AMPARs).	LOPAC
0.0825014	0.773607	(R)-(-)- Phenylephrine hydrochloride	α1-adrenoceptor agonist.	LOPAC
0.0831797	0.471024	Tomatidine	Potent inhibitor of Staphylococcus aureus small-colony variants typically seen as complications of cystic fibrosis, with little or no effect on normal S. aureus strains. Also shows antiinflammatory activity by indirectly inhibiting iNOS and COX-2 pathways. Tomatidine induces the anti-oxidant nuclear factor E2-related factor 2 (Nrf2) and mitophagy, favoring the delay in aging process in C.elegans.…	Natural
0.0837683	0.737589	Nateglinide	a Kir6.2/SUR1 channel inhibitor and antidiabetic. It is selective for the SUR1 subtype, which is found on pancreatic islet cells. Nateglinide evokes KATP channel-dependent insulin secretion (50-200 μM) in the absence and presence of insulin.	FDA
0.0839136	0.661398	SU1498	potent and selective inhibitor of the VEGFR2 receptor kinase, Flk-1 with an IC50 value of 700 nM. SU1498 is a very weak inhibitor of PDGFR-kinase, EGFR-kinase and HER-2 kinase with IC50 values > 50 μM. SU1498 has been used to study the role of VEGFR2 (Flk-1) in a variety of biological activities including angiogenesis, tumor growth inhibition, and stem cell proliferation.	LOPAC
0.0842713	0.740914	Galantamine·HBr	Cholinesterase inhibitor; reverses scopolamine-induced amnesia; antimyasthenic	FDA
0.0854316	0.714104	Ferulic acid	Hydroxycinnamic acid found in plant-based foods. Antioxidant.	Natural
0.0855421	0.861049	Aripiprazole	a second generation atypical antipsychotic and anti-depressant with partial agonist activity at dopamine D2 and serotonin 5-HT1A receptors and antagonist activity at serotonin 5-HT2A receptors	FDA
0.0855563	0.600362	BIX-01294·3HCl	GLP and G9a histone lysine methyltransferase inhibitor (IC50 values are 0.7 and 1.7 μM respectively) that displays no activity at other histone methyltransferases up to 37 μM. Modulates H3K9me2 levels in mammalian cells and potentiates induction of pluripotent stem cells from somatic cells in vitro. Also inhibits H3K36 methylation by oncoproteins NSD1, NSD2 and NSD3 (IC50 values are 40 - 112 μM).…	Epigenetic
0.0868896	0.460289	Rhamnetine	a monomethoxyflavone that is quercetin methylated at position 7. It has a role as a metabolite, an antioxidant and an anti-inflammatory agent.	Natural
0.0868896	0.606609	(3aR)-(+)-Sclaerolide	a diterpenoid compound mainly used in the perfume industry for its amber like odor; may be used in the total syntheses of bioactive compounds such as (+)-chloropuupehenone, (+)-chloropuupehenol[1], cyslabdan[2], acuminolide and 17-O-acetylacuminolide.[3] It may also be used in the preparation of γ-bicyclohomofarnesal, an ambergris odorant	Natural
0.0869016	0.609899	Methyldopa Sesquihydrate (L-Α-Methyl-Dopa Sesquihyrate)	a phenylalanine derivative and an aromatic amino acid decarboxylase inhibitor with antihypertensive activity. Methyldopa is a prodrug and is metabolized in the central nervous system. The antihypertensive action of methyldopa seems to be attributable to its conversion into alpha-methylnorepinephrine, which is a potent alpha-2 adrenergic agonist that binds to and stimulates potent central inhibito…	FDA
0.0879993	0.521868	Gatifloxacin	a fourth-generation fluoroquinolone antibiotic that inhibits DNA gyrase and topoisomerase, which are necessary for DNA replication, transcription, repair and recombination. It has 100 times higher affinity for bacterial DNA gyrase than for mammalian DNA gyrase. Gatifloxacin is active against both Gram-positive and Gram-negative bacteria	FDA
0.0887152	0.587241	Levonorgestrel	a progestin and has effects similar to those of the hormone progesterone	FDA
0.0888251	0.666045	Succinylcholine chloride	Cholinergic antagonist which induces a long-lasting depolarization of the acetylcholine neuron membrane; neuromuscular blocking agent.	LOPAC
0.0897742	0.783031	Leflunomide	Leflunomide belongs to the new class of immunomodulating drugs with inflammatory and immunomodulating properties. It has been investigated for application in transplantation procedures. It is also an anti-rheumatic drug (DMARD) used to treat rheumatoid arthritis (RA).[1] Its mode of action involves the inhibition of T-cell proliferation after converting to its active metabolite i.e. A771726 in hu…	LOPAC
0.0900061	0.673946	Felodipine	L-type calcium channel blocker	LOPAC
0.0902231	0.769742	Isoxanthopterin	substrate for the enzyme isoxanthopterin deaminase	LOPAC
0.0907894	0.588822	Eptifibatide acetate	specific inhibitor of fibrinogen binding to the platelet membrane integrin glycoprotein GPIIb/IIIa receptor, preventing platelet aggregation. Eptifibatide binds reversibly and competitively.	LOPAC
0.0911083	0.751788	Norfloxacin	blocks DNA replication by interfering with an ATP-induced structural transition of DNA complexed with DNA gyrase (topoisomerase)	FDA
0.0912658	0.426074	Cyproheptadine hydrochloride	serotonin receptor (5-HT2/5-HT1C) antagonist,[1] H1 histamine receptor antagonist[2] and an antipruritic	LOPAC
0.0918726	0.645428	L-Histidine hydrochloride	takes part in protein methylation; associated with the hemoglobin structure and function; present in antioxidative dipeptides; involved in one-carbon unit metabolism	LOPAC
0.0921052	0.238766	Ochratoxin A	mycotoxin found in food that is nephrotoxic and carcinogenic in the kidney and induces differentiation in cloned renal cell lines. Increases endoplasmic reticulum ATP-dependent Ca2+ pump activity	Natural
0.0921052	0.66011	Oleanolic acid	isolated from medicinal plants. Antitumor and hepatoprotective agent.	Natural
0.0944642	0.492123	Fluticasone Propionate	second generation glucocorticoid. Used as an anti-inflammatory agent for asthma. Shown to enhance eosinophil apoptosis in a concentration-dependent manner via the glucocorticoid receptor	FDA
0.095196	0.64592	Zaprinast	Selective inhibitor of cGMP-specific phosphodiesterases V and VI (PDE5/6) and an agonist at the G protein-coupled receptor 35 (GPR35).	LOPAC
0.0952034	0.283203	Picropodophyllin	an insulin-like growth factor-I (IGF-I) receptor kinase inhibitor	Natural
0.0952034	0.637818	Norharmane	Inhibitor of indoleamine 2,3-dioxygenase (IDO).	Natural
0.095524	0.638475	Fenoldopam monohydrobromid e	A dopamine D1 receptor agonist that is used as an antihypertensive agent. It lowers blood pressure through arteriolar vasodilation.	LOPAC
0.0958013	0.357143	Acrivastine	a second-generation antihistamine, an H1-receptor antagonist.	FDA
0.0962193	0.495016	Dasatinib	an orally available and highly potent pan-Src/Bcr-Abl inhibitor (Ki values are 16 and 30 pM, respectively. It also inhibits Lck, Fyn, c-kit and Yes with IC50 values in the subnanomolar range. Dasatinib exhibits potent antitumor activities and is used for treatment of chronic myelogenous leukemia (CML) and acute lymphoblastic leukemia (ALL).	FDA
0.097817	0.574956	4-Amino benzamidine diHCl	Competitive inhibitor of serine proteases	LOPAC
0.0979482	0.633776	Teriflunomide	orally available anti-inflammatory immunomodulator. It blocks the activity of dihydroorotate dehydrogenase, preventing pyrimidine synthesis and T and B cell proliferation and function. Teriflunomide has been used to treat rheumatoid arthritis and was recently approved for multiple sclerosis.	LOPAC
0.100566	0.663699	Lindane	interferes with GABA neurotransmitter function by interacting with the GABAA receptor-chloride channel complex at the picrotoxin binding site	FDA
0.102186	0.753114	NADPH tetrasodium	an electron donor and a cofactor for many redox enzymes including nitric oxide synthetase	LOPAC
0.102749	0.654599	Toremifene Base	selective estrogen receptor modulator (SERM) that also moderates androgen receptor activity as well	FDA
0.103083	0.330481	Brucine-N-oxide	Analgesic and anti-inflammatory	Natural
0.103367	0.610788	Levocetirizine Dihydrochloride	nonsedating antihistamine. It is a histamine H1-receptor antagonist, the active isomer of cetirizine. Levocetirizine has high bioavailability, high affinity for and occupancy of the H1 receptor.	FDA
0.103927	0.657779	Fluoxetine hydrochloride	a selective serotonin reuptake inhibitor and functions as an antidepressant	LOPAC
0.104043	0.427224	Rotenone	an inhibitor of mitochondrial electron transport at nicotinamide adenine dinucleotide (NADH):ubiquinone oxidoreductase	Natural
0.104231	0.293152	Apigenin-7-glucoside	a flavone belonging to the class of polyphenols and is commonly found in Thymus species. It shows a broad spectrum of pharmacological properties such as antispasmodic, bactericidal, expectorant, antihelmintic, adstringent, antitussive and carminative agent.	Natural
0.104231	0.475216	Aucubin	iridoid glycoside; Aucubin was found to protect against liver damage induced by carbon tetrachloride or alpha-amanitin in mice and rats when 80 mg/kg was dosed intraperitoneally	Natural
0.10656	0.627708	JS-K	belongs to the class of diazeniumdiolate prodrug. It generates nitric oxide when metabolized by glutathione S-transferases (GST), which ensures optimal activity of JS-K. It has tumor growth inhibition action in human prostate cancer and leukemia.	LOPAC
0.106948	0.605056	(±)-Nipecotic acid	potential inhibitor of uptake of γ-aminobutyric acid (GABA)	LOPAC
0.108379	0.451445	Bendamustine·HCl	DNA-alkylator with a distinct pattern of activity. Bendamustine activates DNA-damage stress response and apoptosis; inhibits mitotic checkpoints; and induces mitotic catastrophe.	FDA
0.108666	0.411846	Stavudine	a nucleoside analog of thymidine. It is phosphorylated by cellular kinases into an active triphosphate. Stavudine triphosphate inhibits HIV's reverse transcriptase by competing with the natural substrate, thymidine triphosphate. Reverse transcriptase is the enzyme the virus uses to make a DNA copy of its RNA in order to insert its genetic material into the host's DNA. Upon incorporation into the …	FDA
0.108696	0.551123	Alprenolol hydrochloride	antihypertensive, anti-anginal, and anti-arrhythmic agent.	LOPAC
0.109892	0.441814	Aminocaproic Acid	reported to inhibit chymotrypsin, Factor VIIa, lysine carbo­xy­peptidase, plasmin, and plasminogen activator.	FDA
0.110304	0.572503	Demeclocycline·HCl	a tetracycline antibiotic derived from a strain of Streptomyces aureofaciens. DMC protects neurons from glutamate induced toxicity by suppressing calpain I and II activities.	FDA
0.111853	0.708726	(±)-p-Chloro phenylalanine	an inhibitor of 5-hydroxytrytamine (5-HT) synthesis.	LOPAC
0.113944	0.513402	Taucholic acid sodium salt hydrate	Non-sulfated bile salt, physiological transport substrate for the bile salt export pump/sister of Pgp (BSEP/spgp), Na(+)/taurocholate cotransporter (NTCP) and MRP3 into the hepatic carnalicular.	LOPAC
0.114782	0.772701	Neomycin trisulfate	acts by binding to the 30S and 50S subunits, causing miscoding and inhibiting initiation and elongation during protein synthesis. Neomycin also blocks voltage-sensitive Ca2+ channels without affecting the Na+/Ca2+ antiporter in neurons.	FDA
0.115094	0.420486	(±)-p- Aminoglutethimide	derivative of the sedative glutethimide. Originally introduced as an anticonvulsant, it was found to cause adrenal insufficiency. Blocks adrenal steroidogenesis by inhibiting the enzymatic conversion of cholesterol to pregnenolone. It also blocks the peripheral conversion (aromatization) of androgenic precursors to estrogens. The D-isomer is 30 times more potent at inhibiting aromatase activity, …	LOPAC
0.115827	0.860366	alpha-Methyl-5- hydroxytryptamine maleate	5-HT2B receptor selective agonist with pKi values of 8.4, 6.1 and 7.3 at 5-HT2B, 5-HT2A and 5-HT2C receptors respectively.	LOPAC
0.117625	0.531225	Fluvastatin·Na	the sodium salt of a synthetic lipid-lowering agent with potential antineoplastic activity. Fluvastatin competitively inhibits hepatic 3-hydroxy-3-methylglutaryl coenzyme A (HMG-CoA) reductase, the enzyme that catalyzes the conversion of HMG-CoA to mevalonate, a key step in cholesterol synthesis.	FDA
0.1198	0.41529	BW 284c51	Selective acetylcholinesterase inhibitor.	LOPAC
0.120065	0.344776	AIDA	Selective mGluR1 metabotropic glutamate receptor antagonist.	LOPAC
0.120288	0.619455	Hispidin	Potent inhibitor of protein kinase Cβ, cytotoxic for cancer cells.	LOPAC
0.121215	0.691324	GW9662	irreversible PPARγ antagonist. GW9662 inhibits connective tissue growth factor and activation of CD36 by IL-4.	LOPAC
0.121768	0.883618	Caffeine	A central nervous system stimulant believed to act through adenosine receptors and monoamine neurotransmitters. It is an adenosine receptor antagonist and adenosine 3′,5′-cyclic monophosphate (cAMP) phosphodiesterase inhibitor. Thus, levels of cAMP increase in cells following treatment with caffeine. It has been reported to affect cellular calcium levels, releasing calcium from intracellular stor…	FDA
0.123773	0.518976	Schisantherin A	Schisantherin A is a lignan isolated from the fruits of Schisandra chinesi.[1] Schisantherin A is a mechanism-based inhibitor that competitively inhibits and irreversibly inactivates CYP3A4.[2] Schisantherin A (StA) has neuroprotective activity and could be potential candidate for the treatment of neuron loss in neurodegenerative diseases including Parkinson’s disease. It inhibits tumor progressi…	Natural
0.124097	0.545797	Colistimethate·Na	belongs to the class of polymyxin antibiotics that acts by inhibiting the Gram negative bacteria. It is a prodrug that can hydrolyze to colistin in vivo or in vitro.	FDA
0.124627	0.745121	Eprosartan Mesylate	Angiotensin II type 1 (AT1) receptor antagonist; anti-hypertensive.	FDA
0.124808	0.592063	Doripenem	Doripenem is an ultra-broad spectrum carbopenem antibiotic. Doripenem is active against both gram-positive and gram-negative bacteria.	FDA
0.125748	0.444863	Etodolac	Non-steroidal anti-inflammatory compound that is a non-selective inhibitor of COX-1 and COX-2.	FDA
0.125775	0.290634	Tigecycline	broad spectrum glycylcycline antibiotic. Tigecycline is bacteriostatic, that inhibits protein synthesis by binding to the 30S ribosomal subunit of bacteria and thereby blocking entry of Aminoacyl-tRNA into the A site of the ribosome during prokaryotic translation. Tigecycline is active against resistant strains of gram-positive and gram-negative bacteria, avoiding the two most common mechanisms o…	FDA
0.126804	0.556705	Eflornithine·HCl	inhibits polyamine biosynthesis by the selective, irreversible inhibition of ornithine decarboxylase (ODC). A chemoprotective agent that blocks angiogenesis.	FDA
0.128388	0.792001	Spectinomycin·2HCl Pentahydrate	acts by inhibiting protein synthesis and elongation by binding to the bacterial 30S ribosomal subunit and interfering with peptidyl tRNA translocation.	FDA
0.128455	0.608219	Lactulose	a synthetic disaccharide derived from galactose and fructose. It is not absorbed in the gut and is frequently used in the treatment of constipation and hepatic encephalopathy. Studies have reported that lactulose administration may cause an increase in fecal nitrogen. It is also known to function as a prebiotic. Lactulose measurements can be used to detect gastrointestinal dysfunctions.	FDA
0.129851	0.642214	Metronidazole	prodrug and is selective for anaerobic bacteria due to their ability to intracellularly reduce metronidazole to its active form. Reduced metronidazole covalently binds to DNA which disrupts its helical structure, induces DNA strand breaks and inhibits bacterial nucleic acid synthesis. Bacterial cell death results.	FDA
0.13074	0.818755	Nialamide	Non-selective MAO-A/B inhibitor.	LOPAC
0.131132	0.590566	(±)-Atenolol	Selective β1-adrenoceptor antagonist; antihypertensive; antianginal; antiarrhythmic.	FDA
0.132075	0.6593	Lisinopril·2H2O	Angiotensin converting enzyme (ACE) inhibitor.	FDA
0.132466	0.602706	Hexamethonium dichloride	preferentially blocks nicotinic receptors at autonomic ganglia,[5] crosses blood-brain barrier only at high doses	LOPAC
0.133719	0.641233	Tramadol·HCl	inhibits the reuptake of norepinephrine and serotonin in μ-opioid receptors	FDA
0.133793	0.610145	Triacetylresveratrol	Resveratrol prodrug. SIRT inhibitor	Epigenetic
0.133798	0.469867	Fenoldopam Mesylate	Fenoldopam mesylate is a selective dopamine D1 receptor agonist used as an antihypertensive agent. It is an agonist for D1-like dopamine receptors and binds with moderate affinity to α2-adrenoceptors. It has no significant affinity for D2-like receptors, α1 and α-adrenoceptors, 5HT1 and 5HT2 receptors, or muscarinic receptors. Fenoldopam mesylate causes peripheral vasodilation by stimulating dopa…	FDA
0.136182	0.642391	AGI-5198 (IDH-C35)	highly potent and selective mutant isocitrate dehydrogenase 1 (IDH1) inhibitor	Epigenetic
0.139829	0.502756	Methacholine Chloride	Metabolically stable analog of acetylcholine; muscarinic agonist. Its ability to constrict airway smooth muscle is used to assess bronchial reactivity in the laboratory and clinically.	FDA
0.140087	0.580261	Ibandronate·Na Monohydrate	inhibits farnesyl diphosphate synthase (IC50 = 20 nM). Ibandronate sodium is also a bone resorption inhibitor. It has been investigated for in vitro anti-tumor effects, such as apoptosis induction, inhibitor of cell growth, inhibition of invasive behavior, and inhibition of angiogenesis and for its in vivo role in various cancers including breast and prostate cancers.	FDA
0.140744	0.733037	N-Methyl-D- aspartic acid	Excitotoxic amino acid. Prototypic agonist at the NMDA-type glutamate receptor that regulates ion channels; important in long-term potentiation, ischemia, and epilepsy.	LOPAC
0.140797	0.456114	AB-MECA	High affinity A3 adenosine receptor agonist	LOPAC
0.141771	0.707759	GR 113808	Potent and selective 5-HT4 antagonist	LOPAC
0.14231	0.782009	Kainic acid	Kainate agonist; excitant and neurotoxin	LOPAC
0.142597	0.532937	Chlormethiazole HCl	Potentiates GABAA receptor function	LOPAC
0.143093	0.575023	Betulin	triterpene with lupane nucleus, is found in the bark of birch trees; may be used in the preparation of betulinic acid	Natural
0.143682	0.567515	2-(2-Aminoethyl) isothiourea diHBr	NOS inhibitor	LOPAC
0.144059	0.626047	Cycloastragenol	used as a nutraceutical (e.g. TAT2) and seems to moderately increase the telomerase activity and proliferative capacity of both CD4 and CD8 T-cells. Cycloastragenol possesses antiviral, antimicrobial, anti-inflammatory, anti-hepatotoxic, anti-leukemia, antitumor and antinociceptive activity. It also acts as an immunomodulator	LOPAC
0.14406	0.547665	Milrinone	Phosphodiesterase type III inhibitor; cAMP-specific, cGMP-inhibitable; potent cardiotonic, positive inotropic vasodilator.	FDA
0.145854	0.54695	Amlexanox	an anti-allergy and anti-asthma drug that blocks histamine and leukotriene release from leukocytes and mast cells. Amlexanox has also been shown to inhibit cahaperone activity of Hsp90, and S100A13, which is involved in transport of proteins devoid of signal peptide sequences.	FDA
0.146138	0.425762	Chlorothiazide	One of the first in the thiazide class of diuretics. The effect is sparing of calcium and lithium, but increases the excretion of sodium.	FDA
0.146227	0.740267	L-Methionine sulfoximine	increases ornithine decarboxylase activity, decreases the survival rate in a model of transient cerebral ischemia, and inhibits glutamine synthetase activity.	LOPAC
0.146823	0.777119	Ivermectin	Positive allosteric modulator of α7 neuronal nicotinic acetylcholine receptor; also modulates glutamate-GABA-activated chloride channels.	FDA
0.147267	0.333114	Graveoline	Selective Acetylcholinesterase Inhibitory Activity	Natural
0.147269	0.491222	Pitavastatin Calcium	competitive inhibitor of HMG-CoA reductase	FDA
0.147494	0.605651	Hydralazine·HCl	Inhibits DNA methyltransferase and modulates epigenetic regulation of gene expression. Non-selective MAO-A/B inhibitor; antihypertensive; semicarbazide-sensitive amine oxidase inhibitor.	FDA
0.148069	0.642333	Captopril	Angiotensin converting enzyme inhibitor. Inhibits the formation of angiotensin II, a bioactive peptide that stimulates angiogenesis and increases microvessel density.	LOPAC
0.148191	0.54384	3'-Azido-3'- deoxythymidine	Reverse transcriptase inhibitor active against HIV-1 virus.	LOPAC
0.149095	0.738054	Ticlopidine·HCl	a thienopyridine which, when metabolized by the body, irreversibly blocks the P2Y12 component of the ADP receptor on the surface of platelets	FDA
0.150966	0.528491	Cefixime	binds to one of the penicillin binding proteins (PBPs) which inhibits the final transpeptidation step of the peptidoglycan synthesis in the bacterial cell wall, thus inhibiting biosynthesis and arresting cell wall assembly resulting in bacterial cell death.	FDA
0.150979	0.603003	Dolasetron	blocks the activity of serotonin released from the enterochromaffin cells of the small intestine by selectively inhibiting and inactivating 5-HT3 receptors located on the nerve terminals of the vagus nerve in the periphery and centrally in the chemoreceptor trigger zone of the area postrema.	FDA
0.15131	0.49743	Narirutin	possess anti-allergic, anti-inflammatory, anti-proliferative, and anti-oxidant properties.	Natural
0.15131	0.632573	Physostigmine	parasympathomimetic, specifically, a reversible cholinesterase inhibitor which effectively increases the concentration of acetylcholine at the sites of cholinergic transmission	Natural
0.152327	0.509928	Efavirenz	nonnucleoside reverse transcriptase inhibitor (NNRTI). It is an anti-HIV drug, commonly used in combination therapy for AIDs treatment. It is part of highly active antiretroviral therapy (HAART) for the treatment of a human immunodeficiency virus (HIV) type 1.	LOPAC
0.152925	0.625281	Imidazole-4-acetic acid hydrochloride	Competitive antagonist at GABAC receptors.	LOPAC
0.154779	0.818131	NG-Monomethyl-L- arginine acetate	NG-Methyl-L-arginine is an inhibitor of nitric oxide synthase in neurons, endothelial cells, and macrophages.[2] It inhibits endothelium-derived relaxing factor and promotes contraction in pulmonary artery and vein. It stereo selectively inhibits the generation of nitric oxide (NO) from arginine.[1] It promotes epinephrine and glucose levels, contributing to hyperglycemia in central nervous syste…	LOPAC
0.154994	0.479153	Clopidogrel Bisulfate	antiplatelet drug, which belongs to the thienopyridine class of drug	FDA
0.156773	0.79172	Loperamide hydrochloride	Loperamide hydrochloride (HCl) is a non-selective Ca2+ channel blocker. At nanomolar concentrations, it binds to μ-opioid receptors. Loperamide HCl does not cross the blood-brain barrier.	LOPAC
0.156852	0.396469	Ceftibuten	Ceftibuten is a third generation cephalosporin antibiotic	FDA
0.157012	0.671263	Naproxen	Non-selective cyclooxygenase (COX-1 and COX-2) inhibitor.	FDA
0.158581	0.650973	Pramipexole Dihydrochloride Monohydrate	dopamine agonist active at D3 and D2 receptor subtypes. Pramipexole has been found to have neuroprotective effects independent of its dopamine receptor agonism. It reduces mitochondrial reactive oxygen species (ROS) production and inhibits the activation of apoptotic pathways.	FDA
0.158894	0.585384	Mefenamic Acid	An NSAID. Circumvents MRP-mediated multidrug resistance. Specifically and significantly potentiates the cytotoxicity of anthracyclines (doxorubicin, daunorubicin and epirubicin), as well as teniposide, VP-16 and vincristine	FDA
0.159353	0.849231	Methysergide maleate	An antagonist of the 5-HT2B (pki = 8.0-9.4) and 5-HT2C (pki = 8.6-9.1) receptor. At the 5-HT1A and some other 5-HT receptors it serves as a partial agonist.	LOPAC
0.160336	0.596527	Norethindrone	n oral contraceptive involved in the inhibition of cytosolic sulfotransferases	FDA
0.160566	0.846393	CGS-15943	Potent adenosine receptor antagonist	LOPAC
0.161089	0.754331	(±) Isoproterenol·HCl	Isoproterenol hydrochloride is useful in post transplantal organ recovery. It exhibits ionotropic and chronotropic effects. With respect to donor heart recovery, isoproterenol hydrochloride decreases peripheral and systemic vascular resistance. Isoproterenol also increases the heart rate.[1] β-adrenoceptor agonist; increases cytosolic cAMP.	FDA
0.161216	0.60478	rac BHFF	rac BHFF is an orally active, potent and selective positive allosteric modulator of GABA-B. rac BHFF increases the potency and efficacy of GABA.	LOPAC
0.161375	0.402226	Fingolimod	immunomodulating drug and sphingosine 1-phosphate (S1P) receptor modulator	FDA
0.162065	0.788098	Metrazoline oxalate	Potent and selective imidazoline binding site ligand	LOPAC
0.162177	0.78236	Ofloxacin	inhibits bacterial DNA gyrase and topoisomerase IV, which haults DNA replication and cell division. Ofloxacin has been shown to convert LytA from the inactive E-form to the active C-form[2]. It is a chiral molecule that inhibits pneumococcal cell wall-degrading virulence factors[	LOPAC
0.163285	0.607318	MNS	Src and Syk kinase inhibitor that prevents phosphorylation and cytoskeletal association of GPIIb/IIIa and talin.	LOPAC
0.163433	0.382951	Crotamiton	inhibits TRPV4	FDA
0.163871	0.57183	Carglumic Acid	structural analogue of N-acetylglutamate (NAG), which is an essential allosteric activator of carbamoyl phosphate synthetase 1 (CPS 1) in liver mitochondria	FDA
0.164509	0.596201	Clavulanate Potassium	β-lactamase inhibitor, typically added to amoxicillin to increase its effectiveness.	FDA
0.164694	0.506474	Bay 11-7082	an inhibitor of cytokine-induced IκB-α phosphorylation	LOPAC
0.164727	0.482947	Silymarin	Silymarin is originally known to protect liver from various toxic agents and is used in treating hepatitis and cirrhosis. Silymarin possesses many biological actions such as antifibrotic, anti-lipid peroxidative, anti-inflammatory, immunomodulatory and membrane stabilizing. Silymarin also aids in liver regeneration.[2] Silymarin provides cardioprotective activity against ischemia-reperfusion indu…	Natural
0.165498	0.615086	4-Imidazole methanol HCl	member of the class of imidazoles that is 1H-imidazole substituted by a hydroxymethyl group at position 4. It is a primary alcohol and a member of imidazoles.	LOPAC
0.166677	0.289256	Triamcinolone Acetonide	glucocorticoid and a derivative of pregnane, used mainly in the treatment of rheumatic disease, allergic and dermatologic symptoms	FDA
0.167	0.639116	Imazodan	Selective phoshodiesterase III (PDE3) inhibitor.	LOPAC
0.167081	0.599647	Venlafaxine·HCl	Venlafaxine is an antidepressant. The mechanism of the antidepresant action of venlafaxine in humans is associated with its potentiation of neurotransmitter activity in the CNS. Venlafaxine is a potent inhibitor of neuronal serotonin and norepinephrine reuptake and weak inhibitor of dopamine reuptake. Venlafaxine has no significant activity for muscarinic, histaminergic, or α-1 adrenergic recepto…	FDA
0.167137	0.659591	SCH 58261	Potent, highly selective A2A antagonist	LOPAC
0.16836	0.741813	Pirenperone	5-HT2 serotonin receptor antagonist.	LOPAC
0.169282	0.527268	L-732,138	Potent and selective NK1 antagonist	LOPAC
0.170414	0.635338	Fosinopril·Na	angiotensin converting enzyme (ACE) inhibitor. Fosinopril is also known to inhibit the activity of the peptide transporter PEPT2.	FDA
0.170461	0.792334	Latanoprost	potent, selective prostaglandin FP receptor agonist.	FDA
0.170947	0.449805	Alloxazine	a benzo[g]pteridine-2,4-dione. It is a tautomer of an isoalloxazine.	LOPAC
0.172101	0.652396	Zonisamide sodium salt	an anti-epileptic. It is effective in various animal epilepsy models and humans with both partial and generalized epileptic seizures. Zonisamide sodium salt also scavenges nitric oxide (NO).	LOPAC
0.17308	0.513402	5-(N,N-Dimethyl) amiloride hydrochloride	selective blocker of Na2/H+ antiport	LOPAC
0.174305	0.747144	Prazosin hydrochloride	Peripheral α1-adrenoceptor antagonist; vasodilator. Prazosin can be used to treat chronic posttraumatic stress disorder (PTSD).[1] It plays a role in reducing blood pressure by relaxing blood vessels, hence used in the treatment of high blood pressure.[2	LOPAC
0.174583	0.58146	Phytonadione	antagonizes the actions of warfarin. Phytonadione catalyzes the hepatic synthesis of blood-clotting factors including active prothrombin (Factor II), Factor VII, Factor IX, and Factor X.	FDA
0.175481	0.818298	Lidocaine N-ethyl bromide	A quaternary derivative of lidocaine that is not membrane permeable. Blocks both fast Na+-dependent action potentials and voltage-dependent, non-inactivating Na+ conductance.	LOPAC
0.17614	0.614843	JFD00244	JFD00244 is a SIRT (sirtuin, human silent information regulator) inhibitor.	LOPAC
0.176471	0.742492	(-)-Naproxen sodium salt	Cyclooxygenase (Prostaglandin H synthase 1 and 2) inhibitor.	LOPAC
0.17672	0.482835	Adenosine	an organic compound that occurs widely in nature in the form of diverse derivatives. The molecule consists of an adenine attached to a ribose via a β-N9-glycosidic bond. Adenosine is one of four nucleoside building blocks to RNA, which is essential for all life.	LOPAC
0.177826	0.423147	Teterahydroalstonine	a heteropentacyclic compound that is (20alpha)-16,17-didehydro-18-oxayohimban which is substituted at position 16 by a methoxycarbonyl group and at position 19 by a methyl group. It is a metabolite found in several plant species. It has a role as a plant metabolite. It is a yohimban alkaloid, an organic heteropentacyclic compound and a methyl ester. It is a conjugate base of a tetrahydroalstonine…	Natural
0.177826	0.64385	Ellagic acid	A naturally occurring plant phenol that is a potent antioxidant presumably by acting as a scavenger of oxygen species produced by hydrogen peroxide treatment, and as a protector of the DNA double helix from alkylating agent injury. It therefore has anti-mutagenic and anti-carcinogenic properties. Also reported to inhibit topoisomerases I and II and gyrase.	Natural
0.178886	0.763508	Palmitoyl-DL- Carnitine chloride	phosphokinase C inhibitor	LOPAC
0.180164	0.588727	Imiquimod	caspase 3 activator	FDA
0.18055	0.604163	Harmane	I1 imidazoline binding site agonist.	LOPAC
0.18084	0.795651	Clodronic acid	A non-amino, chloro-containing, bisphosphonate that acts as a potent inhibitor of osteoclast-mediated bone resorption. Metabolized to a non-hydrolyzable ATP analog in osteoclasts and macrophages that induces apoptosis by inhibiting mitochondrial function. An efficient metal chelator that inhibits invasion, adhesion and migration of PC-3 prostate cancer cells (IC50 = 100 nM).	LOPAC
0.180865	0.662469	Zimelidine dihydrochloride	Selective 5-HT uptake inhibitor	LOPAC
0.182479	0.28652	Cantharidin	Inhibitor of protein phosphatase 2A.	LOPAC
0.184885	0.571233	Foscarnet·Na (Sodium Phosphonoformate Tribasic Hexahydrate)	used as an antiviral agent in the treatment of cytomegalovirus retinitis (CMV retinitis, an inflamation of the retina that can lead to blindness) and as an alternative to ganciclovir for AIDS patients who require concurrent antiretroviral therapy but are unable to tolerate ganciclovir due to haematological toxicity. It has a role as an antiviral drug.	FDA
0.185946	0.694215	GW7647	Highly selective, potent PPARα agonist. Orally active	LOPAC
0.186375	0.557031	4-aminopyridine	K+ channel blocker	LOPAC
0.188031	0.581043	GNF-5	Selective allosteric inhibitor of Bcr-Abl; analog of GNF 2	LOPAC
0.188484	0.472663	Efavirenz	nonnucleoside reverse transcriptase inhibitor (NNRTI). It is an anti-HIV drug, commonly used in combination therapy for AIDs treatment. It is part of highly active antiretroviral therapy (HAART) for the treatment of a human immunodeficiency virus (HIV) type 1.	FDA
0.188829	0.754003	Olanzapine	5-HT2 serotonin and D1/D2 dopamine receptor antagonist	FDA
0.19257	0.800586	Niflumic acid	Selective cyclooxygenase-2 (COX-2) inhibitor.	LOPAC
0.19317	0.66164	Furafylline	methyl xanthine derivative with longer duration of action than theophylline and an inhibitor of cytochrome P4501A2	LOPAC
0.193206	0.236573	C2 Phytoceramide	Yeast growth inhibitor and ceramide-activated protein phosphatase (CAPP) activator.	Natural
0.193511	0.605217	Vecuronium Bromide	an aminosteroidal neuromuscular blocking agent. It relaxes the skeletal muscle and decreases oxygen consumption during surgery. It competes with acetylcholine and bind to cholinergic receptors at neuromuscular junctions.	FDA
0.194409	0.213563	(±)-Abscisic acid	Plant hormone and growth regulator that is involved in several physiological mechanisms including seed dormancy, leaf abscission, stomatal movement, and plant stress responses. Through complex interactions with several intracellular signaling systems, it can regulate the expression of hundreds of plant genes	Natural
0.194409	0.710464	Reserpine	Inhibits vesicular uptake of catecholamines and serotonin.	Natural
0.195738	0.469402	Triprolidine hydrochloride	H1 histamine receptor antagonist.	LOPAC
0.197021	0.555001	Acetyl-beta- methylcholine chloride	Metabolically stable analog of acetylcholine; muscarinic agonist. Its ability to constrict airway smooth muscle is used to assess bronchial reactivity in the laboratory and clinically.	LOPAC
0.197311	0.841491	YM-26734	YM-26734 is a competitive inhibitor of the secreted (Group II) form of phospholipase A2. The IC50 against rabbit platelet derived sPLA2 is 85 nM. YM-26734 is active against, but less potent for group I (pancreatic) sPLA2 (porcine pancreatic enzyme IC50 = 7 μM), and does not inhibit intracellular PLA2 isoforms.	LOPAC
0.19835	0.236777	Datiscetin	a yellow plant dye from the flavonol group. It exhibited inhibitory activity against methicillin-resistant Staphylococcus aureus (MRSA). Datiscetin demonstrated antioxidant activity – it inhibits CCl4-induced microsomal lipid peroxidation and behaved as potent scavenger of the superoxide anion radicals. Datiscetin activated the human constitutive androstane receptor. It inhibited amyloid beta-42 …	Natural
0.19835	0.608445	(-)-Cinchonidine	A diasteroisomer of cinchonine, it occurs in the bark of most varieties of Cinchona shrubs, and is frequently used for directing chirality in asymmetric synthesis. It has a role as a metabolite. It is a cinchona alkaloid and an (8xi)-cinchonan-9-ol. It derives from a hydride of an (8S)-cinchonan.	Natural
0.198808	0.467181	Ciclesonide	glucocorticoid antiasthmatic prodrug; it is de-esterified in the lung to the active metabolite.	FDA
0.199614	0.408501	Chlorzoxazone	skeletal muscle relaxant	FDA
0.199879	0.59723	CP466722	CP466722 is a competetive, reversible inhbitor of Ataxia telangiectasia (A-T) mutated (ATM) kinase. The compound CP466722 disrupts ATM-dependent checkpoint cell cylce events, and reverses ATM-dependent substrate phosphorylation and downstream signaling events following exposure to ionizing radiation.	LOPAC
0.203344	0.480518	Silybine	Silibinin function as a hepatoprotectant in patients with acute and chronic liver injury.[1] This flavonoid fights against various cancer cells including, prostate, skin, breast, colon, lung, bladder and hepatocellular carcinoma (HCC).[3] Silibinin exhibits its efficacy as an anti-cancer agent by blocking the secretion of proangiogenic factors from tumor cells, and by hindering growth and inducin…	Natural
0.20579	0.472071	Estramustine Phosphate·Na	Estradiol mustard prodrug, which binds estradiol receptors irreversibly. Highly effective in treatment of advanced metastatic prostate cancer. Depolymerizes microtubules by binding to microtubule associated proteins (MAPs).	FDA
0.20591	0.703982	Streptomycin Sulfate	acts by inhibiting prokaryote protein synthesis by binding to the S12 protein of the 30S ribosomal subunit, thus preventing the transition from imitation complex to chain-elongating ribosome. This causes miscoding or inhibits initiation.	FDA
0.206457	0.870968	Psoralidin	a furanocoumarin natural product used in Chinese medicine. Psoralidin, a PTP1B inhibitor, has been shown to have anticancer activity with a variety of mechanisms proposed. Psoralidin induces ROS generation in androgen-independent prostate cancer cells, leading to inhibition of cell proliferation. Psoralidin has been found to downregulate NOTCH1 signaling, causing growth arrest in both breast canc…	LOPAC
0.206884	0.628767	Lamivudine	a potent nucleoside analog reverse transcriptase inhibitor (nRTI). It is an analogue of cytidine, and can inhibit both types (1 and 2) of HIV reverse transcriptase as well as the reverse transcriptase of hepatitis B. It needs to be phosphorylated to its triphosphate form before it is active. 3TC-triphosphate also inhibits cellular DNA polymerase.	FDA
0.206901	0.601556	Famotidine	H2 histamine receptor antagonist; anti-ulcer agent	LOPAC
0.206933	0.365188	Amitriptyline hydrochloride	Tricyclic antidepressant; inhibits the norepinephrine and serotonin transporters with Kis of 100 nM and 14.7 nM, respectively; high in vitro affinity for α1-adrenoceptors, serotonin and muscarinic acetylcholine receptors.	LOPAC
0.207039	0.584744	Hexahydro-sila- difenidol hydrochloride, p- fluoro analog	High affinity M3 muscarinic acetylcholine receptor antagonist.	LOPAC
0.208892	0.426766	Metaraminol Bitartrate	α-adrenoceptor agonist.	FDA
0.209195	0.500282	Eplerenone	Eplerenone is an aldosterone antagonist more specific for the mineralocorticoid receptor than spironolactone (S3378), having lower affinity for progesterone, androgen, and glucocorticoid receptors.	FDA
0.209197	0.568191	Agmatine sulfate	Putative endogenous neurotransmitter at imidazoline receptors; displaces clonidine at α2-adrenergic and at imidazoline receptors; blocks NMDA-activated ion channels in hippocampal neurons.	LOPAC
0.209721	0.389947	Prochlorperazine dimaleate	dopamine (D2) receptor antagonist.	LOPAC
0.209827	0.777011	Decamethonium dibromide	Nicotinic acetylcholine receptor partial agonist and neuromuscular blocking agent; depolarizes striated muscles and blocks their activity.	LOPAC
0.209913	0.814981	(S)-3,5- Dihydroxyphenyl glycine	group I metabotropic glutamate receptor agonist.	LOPAC
0.210769	0.626252	Hydrochloro thiazide	Carbonic anhydrase inhibitor	LOPAC
0.211269	0.739044	Tacrine·HCl	reversible cholinesterase inhibitor	FDA
0.212521	0.597317	Cabergoline	a lysergic acid amide derivative, is a potent dopamine D2 receptor agonist. It also acts on dopamine receptors in lactophilic hypothalamus cells to suppress prolactin production in the pituitary gland. It has been used for monotherapy of Parkinson′s disease in the early phase; combination therapy, together with levodopa and a decarboxylase inhibitor such as carbidopa, in progressive-phase Parkins…	FDA
0.212544	0.78456	Donepezil·HCl	centrally acting reversible acetylcholinesterase inhibitor.	FDA
0.213768	0.379213	Acamprosate calcium	GABA γ-aminobutyric acid agonist.	FDA
0.213809	0.442039	Tienilic Acid	P450 inhibitor, a specific suicide substrate for CYP2C9 and CYP2C10	LOPAC
0.213845	0.538687	Atracurium Besylate	Nicotinic acetylcholine receptor antagonist.	FDA
0.21483	0.581683	Alendronate·Na Trihydrate	a bone resorption inhibitor; farnesyl diphosphate synthase inhibitor (IC50 = 460 nM); CD45 protein tyrosine phosphatase inhibitor.	FDA
0.214924	0.737875	Nordihydroguaiaret ic acid from Larrea divaricata (creosote bush)	Lipoxygenase inhibitor; polyphenol-bearing o-dihydroxy (catechol) structure.	LOPAC
0.216653	0.210247	Shikimic acid	precursor for the biosynthesis of aromatic amino acids; known to inhibit ADP (adenosine diphosphate) induced platelet aggregation and blood coagulation	Natural
0.216653	0.686598	Neohesperidin	Flavanone glycoside with neuroprotective and antioxidant properties. Does not inhibit oral carcinogenesis in a rat model unlike other citrus flavanones, but does exert a protective effect against gastritis and gastric lesions.	Natural
0.217343	0.321008	Isoscopoletine	a coumarin that is produced in many plant species by the demethylation of scoparone. It inhibits proliferation of both control and multidrug resistant leukemia cell lines. It also inhibits proliferation of hepatitis B virus in cellular systems.	Natural
0.217343	0.711513	Vitexin	Vitexin has been used as a standard in the determination of therapeutic potential of mung bean via inhibition of HMGB1, which in turn inhibits sepsis type of infection, using high performance liquid chromatography coupled with mass spectrometry (HPLC-MS)	Natural
0.219473	0.615086	5-Hydroxyindol acetic acid	Major serotonin metabolite.	LOPAC
0.220036	0.766164	SB-525334	SB-525334 is a potent activin receptor-like kinase (ALK5)/ type I TGFβ-receptor kinase inhibitor with IC50 = 14.3 nM.	LOPAC
0.221468	0.492433	(±)-2-Amino-5- phosphono pentanoic acid	N-methyl-D-aspartate receptor antagonist	LOPAC
0.221848	0.863652	Dequalinium chloride hydrate	selective blocker of apamin-sensitive K+ channels and inhibitor of XIAP (X-linked inhibitor of apoptosis protein)	LOPAC
0.222193	0.739048	PMEG hydrate	inhibit cell proliferation and cause genotoxicity. PMEG is active against leukemia and melanoma in animal tumor models, and also has antiviral activities against herpes viruses in murine models.	LOPAC
0.222439	0.563841	Melphalan	functions as a potent therapeutics for sarcomatous pulmonary metastases. It forms DNA intrastrand crosslinks by bifunctional alkylation in 5′-GGC sequences.[2] Melphalan acts as a bone-marrow depressant and is implicated in the treatment of multiple myeloma and ovarian cancer	FDA
0.225692	0.455563	Harmaline	CNS stimulant; may act through NMDA receptors	Natural
0.226674	0.757112	Orphenadrine hydrochloride	Muscarinic receptor antagonist; H1 histamine receptor antagonist; muscle relaxant. Orphenadrine has also been reported to inhibit the noradrenergic transporter and to block the NMDA receptor ion channel.	LOPAC
0.228087	0.631668	Nelarabine	Nelarabine is an antineoplastic purine nucleoside analog used in T-cell acute lymphoblastic leukemia. It is a pro-drug of Ara-G, which is converted by cellular kinases to the active 5′-triphosphate, Ara-GTP. Incorporation of Ara-GTP into DNA leads to inhibition of DNA synthesis and apoptosis.	FDA
0.228658	0.622532	Cyclobenzaprine·HCl	type of tricyclic skeletal drug, which is commonly used as a muscle relaxant. It is very effective in treating intractable pain of cervical and lumbar origin caused by skeletal muscle spasm.	FDA
0.231258	0.801758	DC_AC50	DC_AC50 is an inhibitor of copper trafficking proteins Atox1 and CCS, resulting in a disruption of cellular copper transport. Cancer cells rely more heavily on Atox1 and CCS than normal cells. DC_AC50 blockade of copper trafficking induces cellular oxidative stress, affecting cancer cells more strongly than normal cells, and leading to the inhibition of cancer cell proliferation.	LOPAC
0.231372	0.683651	Dipyridamole	Selective inhibitor of phosphodiesterase V (PDE 5); potent coronary vasodilator drug; adenosine transport inhibitor; inhibitor of platelet aggregation.	LOPAC
0.231545	0.759145	Butenafine·HCl	Antifungal; squalene epoxidase inhibitor, inhibits the synthesis of ergosterol needed in fungal cell membranes.	FDA
0.234684	0.294931	(+)-Bicuculline	(+)-Bicuculline acts as a competitive inhibitor of GABA liganding binding to the receptor.	Natural
0.234726	0.616213	Oxacillin sodium salt monohydrate	Oxacillin is a bactericidal agent, which can be used for the treatment of infections due to penicillinase-producing staphylococci. Its mode of action involves inhibition of bacterial cell wall synthesis and thus affects bacterial penicillin-binding proteins	FDA
0.235998	0.74416	Mexiletine hydrochloride	Class IB antiarrhythmic; sodium channel blocker	LOPAC
0.23729	0.631106	R-(+)-8-Hydroxy- DPAT hydrobromide	Selective 5-HT1A agonist; enantiomer of 8-Hydroxy-DPAT hydrobromide	LOPAC
0.238809	0.783706	O-Phospho-L- serine	Group III metabotropic glutamate receptor agonist (mGluR4, mGluR7, and mGluR8)	LOPAC
0.240288	0.254043	Ginkgolide B	Primary constituent of Ginkgo biloba. Potential anticancer agent and neuroprotective.	Natural
0.240476	0.476925	Famciclovir	Famciclovir is an antiretroviral guanosine analog used to treat herpesvirus infections and hepatitis B. Famciclovir is rapidly converted to penciclovir. Viral thymidine kinase phosphorylates penciclovir to a monophosphate form that celular kinases convert in turn to penciclovir triphosphate. Penciclovir triphosphate competitively inhibits viral DNA polymerase and thus viral replication.	FDA
0.24098	0.462438	Diflunisal	competitively inhibits both cyclooxygenase (COX) -1 and -2, with higher affinity for COX-1, and subsequently blocks the conversion of arachidonic acid to prostaglandin precursors. This leads to an inhibition of the formation of prostaglandins that are involved in pain, inflammation and fever.	FDA
0.243518	0.640647	Edrophonium chloride	Acetycholinesterase inhibitor	LOPAC
0.243562	0.75584	Eupatorin	Eupatorin acts as an antiproliferative in cells expressing the CYP1A- family. It induces G2/M block follow by apoptosis in cells expressing the CYP1A- family. It also functions as an anti-inflammatory.	LOPAC
0.247355	0.7473	Propofol	Propofol is approved for induction and maintenance of paediatric anesthesia and sedation in children less than 3 years of age. The mechanism of action involves interaction with gamma-aminobutyric acid A receptor.	LOPAC
0.24738	0.550636	Tiotropium Bromide	structurally related to ipratropium bromide. It is a second-generation anticholinergic agent specific for muscarinic receptors (M1, M2 & M3) in humans	FDA
0.248116	0.384175	Chlorpromazine hydrochloride	Chlorpromazine demonstrates cytotoxic and antiproliferative activity against leukemic cells, but does not affect the viability of normal lymphocytes. Phenothiazine antipsychotic; D2 dopamine receptor antagonist, H1 histamine receptor antagonist; inhibits calmodulin-dependent stimulation of cyclic nucleotide phosphodiesterase and nitric oxide synthase.	LOPAC
0.248168	0.360608	Tubericidin	Toxic adenosine analog with antiviral, antitrypanosomal, and antifungal functions. Mode of action: Inhibits multiple metabolic processes, including RNA processing, nucleic acid synthesis, protein synthesis, and methylation of tRNA through intracellular incorporation into nucleic acids. Tubercidin acts as a plant antifungal, inhibits mammalian SAH hydrolase (SAHH), and blocks purine biosynthesis i…	Natural
0.248168	0.492124	Harmol·HCl·2H2O	induces apoptosis by Caspase-8 activation, CNS stimulant, may act through NMDA receptors, and antitumor agent	Natural
0.248701	0.601547	U-99194A maleate	putative D3 antagonist with a 30-fold preference for the dopamine D3 vs. D2 receptor.	LOPAC
0.248747	0.537753	10058-F4	c-Myc inhibitor that induces cell-cycle arrest and apoptosis	LOPAC
0.249175	0.518154	Desloratadine	Desloratadine is a selective and nonsedating histamine H1 receptor antagonist, an active metabolite of loratadine (Claritin), used to relieve hay fever and allergy symptoms with less drowsiness than other antihistamines; does not significantly inhibits cardiac K+ channels at clinically achievable blood levels. Free from antimuscarinic/anticholinergic effects.	FDA
0.250416	0.438965	Roscovitine	Roscovitine is a purine derived inhibitor. It stimulates apoptosis in cancer cells.[2] It has inhibitory action on mitogen activated protein kinase (MAPK) and M-phase promoting factor (MPF) kinase activity. Roscovitine is known to arrest meiosis and thus, prevent embryonic development.[3] Roscovitine is a potent, selective inhibitor of cyclin-dependent kinases.	LOPAC
0.253467	0.816174	Nifedipine	Nifedipine is a L-type Ca2+ channel blocker;[1] and induces apoptosis in human glioblastoma cells.[5] Nifedipine has neuroprotection activity and protects substantia nigra. Nifedipine has antioxidant potential. Nifedipine downregulates inflammatory cytokines like macrophage inflammatory protein-2 (MIP-2), tumor necrosis factor-α (TNF-α).[2] Nifedipine has antihypertensive properties.[3] Nifedipin…	FDA
0.253624	0.48766	Enclomiphene hydrochloride	non-steroidal estrogen receptor antagonist	LOPAC
0.253838	0.448234	Adefovir Dipivoxil	antiviral acyclic nucleoside phosphonate (ANP) analog that works by blocking reverse transcriptase.[1] It is an inhibitor of duck hepatitis B virus (DHBV) replication that inhibits covalently closed circular DNA (CCC DNA) amplification	FDA
0.254809	0.576985	Reserpine	Inhibits vesicular uptake of catecholamines and serotonin.	LOPAC
0.254956	0.606382	Fluvoxamine maleate	H1 Histamine receptor antagonist.	LOPAC
0.256311	0.551124	Sumatriptan Succinate	5-HT1 serotonin receptor agonist.	FDA
0.256656	0.431835	Quinine sulfate	Potassium channel blocker	LOPAC
0.257854	0.422696	Enalaprilat dihydrate	angiotensin-converting enzyme (ACE) inhibitor	LOPAC
0.258296	0.766538	(±)-Octoclothepin maleate	D2 dopamine receptor antagonist; 5-HT2 serotonin receptor antagonist.	LOPAC
0.258881	0.515769	3-Aminopropionitrile fumarate salt	metabolism of 3-aminopropionitrile leads to release of cyanide ions	LOPAC
0.259353	0.813945	(±)-Chloro-APB hydrobromide	Full D1 dopamine receptor agonist	LOPAC
0.260442	0.605385	Telenzepine dihydrochloride	Potent, selective M1 antagonist	LOPAC
0.261703	0.59921	Doxapram·HCl H2O	central respiratory stimulant; acts through carotid chemoreceptors	FDA
0.262361	0.619536	Yohimbine hydrochloride	α2-adrenergic receptor antagonist	LOPAC
0.263816	0.59727	Levofloxacin·HCl	ctive against Gram-positive and Gram-negative bacteria. It inhibits DNA gyrase (type II topoisomerase) and topoisomerase IV, [6] thereby inhibiting cell division	FDA
0.264157	0.499025	Fulvestrant	selective estrogen receptor down-regulator (SERD). Fulvestrant is a high affinity estrogen receptor antagonist. IC50 = 0.29 nM. Fulvestrant is the first "pure" antiestrogen with no agonistic activity both in vitro and in vivo	FDA
0.265846	0.641471	Naphazoline·HCl	α-adrenoceptor agonist; imidazoline receptor agonist; vasoconstrictor.	FDA
0.266176	0.640119	Trimethoprim	binds to dihydrofolate reductase and inhibits the reduction of dihydrofolic acid (DHF) to tetrahydrofolic acid (THF)	FDA
0.266651	0.561143	BMS-195614	potent neutral retinoic acid receptor RARα selective antagonist	LOPAC
0.271239	0.525606	Myriocin	Myriocin from Mycelia sterilia is a fungal metabolite with potent immunosuppressant activity. It inhibits serine palmitoyltransferase at picomolar concentrations blocking synthesis of ceramide, a precursor of sphingomyelin and glycosphingolipids. It disrupts substratum adhesion of melanoma cells. It has been suggested that its immunosuppressant activity in the cytotoxic T-cell line CTTL-2 is due …	Natural
0.271402	0.493981	Chlorhexidine Dihydrochloride	broad-spectrum antimicrobial biguanide used as a topical antiseptic	FDA
0.271919	0.306604	Himbacine	Selective M2/M4 muscarinic acetylcholine receptor antagonist.	Natural
0.272108	0.78034	SDZ 220-581 hydrochloride	a competitive NMDA receptor antagonist that penetrates the blood brain barrier. ISDZ 220-581 selectively blocks the glutamate recognition-site of the NMDA receptor and reduces prepulse inhibition (PPI)	LOPAC
0.272331	0.313231	6-Aminohexanoic acid	Lysine analog. Promotes rapid dissociation of plasmin, thereby inhibiting the activation of plasminogen and subsequent fibrinolysis. Reported to inhibit plasminogen binding to activated platelets. An early report indicated that it inhibits the activation of the first component of the complement system. Binds and inactivates Carboxypeptidase B.	LOPAC
0.273299	0.51107	(-)-Physostigmine	Acetylcholinesterase inhibitor that crosses the blood-brain barrier and forms a carbamylated enzyme complex with acetyl cholinesterase that degrades slowly.	LOPAC
0.273659	0.58925	Tamoxifen	Protein kinase C inhibitor. Induces apoptosis in human malignant glioma cell lines. Tamoxifen and its metabolite 4-hydroxytamoxifen are selective estrogen response modifiers (SERMs) that act as estrogen antagonists in mammary gland. Blocks estradiol-stimulated VEGF production in breast tumor cells.	LOPAC
0.274822	0.466524	Doxazosin Mesylate	α1-adrenoceptor antagonist; relaxes smooth muscles of the prostate	FDA
0.274952	0.786063	1-Phenyl-3-(2- thiazolyl)-2- thiourea	Dopamine β-hydroxylase inhibitor.	LOPAC
0.276299	0.439728	(+)-Chelidonine	Inhibits tubulin polymerisation (IC50=24 μM), thereby disrupting microtubule structure in cells and inducing a G2/M mitotic arrest.	Natural
0.276299	0.6984	Lasalocid A	antibacterial agent and a coccidiostat	Natural
0.276659	0.480257	Aconitine	Activates tetrodotoxin-sensitive Na+ channels	LOPAC
0.276791	0.720346	Ketoprofen	Non-steroidal anti-inflammatory compound that is selective for COX-1.	FDA
0.277506	0.730256	Ethopropazine hydrochloride	Ethoproprazine hydrochloride is an inhibitor of butyrylcholinesterase; antiparkinsonian. It reduces extrapyramidal motor effects, characteristic of Parkinson′s disease; also alleviates thermal hyperalgesia in rats.	LOPAC
0.277794	0.69188	2,6-Difluor-4-[2- (phenylsulfonylamino )ethylthio]phenoxyac etamide	structurally novel, selective, high affinity AMPA ionotropic glutamate receptor agonist that reduces ischemia-induced performance deficits in rats.	LOPAC
0.278359	0.784855	Nisoldipine	L-type (CaV1.2) calcium channel blocker; dihydropyridine-type calcium channel blocker with selectivity for smooth muscle (CaV1.2b) over cardiac muscle (CaV1.2a). Arterial vasodilator and antihypertensive agent.	FDA
0.279739	0.443478	Cyclosporin A	A fungal metabolite possessing potent immunosuppressive properties. It inhibits the T-cell receptor signal transduction pathway via the formation of cyclosporin A−cyclophilin complex that inhibits calcineurin (protein phosphatase 2B). Inhibits nitric oxide synthesis induced by interleukin 1α, lipopolysaccharides and TNFα. Can block cytochrome c release from mitochondria.	LOPAC
0.280822	0.437032	Icaritin	Icaritin enhances osteoblastic differentiation of mesenchymal stem cells (MSCs). It may have estrogen-like activities.	LOPAC
0.281447	0.280691	Zanamivir	influenza viral neuraminidase inhibitor.	FDA
0.282229	0.660169	Scopolamine·HBr	inhibits the action of acetylcholine at muscarinic receptors in the ciliary muscle	FDA
0.282855	0.782023	CPCCOEt	selective non-competitive metabotropic glutamate receptor mGluR1 antagonist	LOPAC
0.282888	0.644932	Celecoxib	Celecoxib is a non-steroidal, anti-inflammatory drug (NSAID) and a cyclooxygenase-2 (COX-2) selective inhibitor. Celecoxib is at least 10-20 times more selective for COX-2 over COX-1.	FDA
0.283507	0.690244	Ribavirin	Antiviral agent. Its metabolite, ribavirin 5′-phosphate, is an inhibitor of inosine monophosphate (IMP) dehydrogenase. Used to inhibit purine (GTP pools) biosynthesis at the level of inosine monophosphate (IMP) dehydrogenase and as a precursor to the di- and tri-phosphates which inhibit viral RNA-dependent RNA polymerases.	FDA
0.283887	0.262643	Convolvamine		Natural
0.283887	0.538946	Caryophylline	exerts anti-inflammatory action via inhibiting the main inflammatory mediators, such as inducible nitric oxide synthase (iNOS), Interleukin 1 beta (IL-1β), Interleukin-6 (IL-6), tumor necrosis factor-alfa (TNF-α), nuclear factor kapp a-light-chain-enhancer of activated B cells (NF-κB), cyclooxygenase 1 (COX-1), cyclooxygenase 2 (COX-2).	Natural
0.283959	0.535983	Estrone	agonist for the estrogen receptor	FDA
0.284066	0.2129	Genistin	Selective inhibitor of mammalian terminal deoxynucleotidyl transferase (TdT)	Natural
0.284066	0.522161	Antimycin A1	Inhibitor of electron transfer at complex III. Induces apoptosis.	Natural
0.288932	0.621925	Tetracycline	passively diffuses through proin channels in the cell membrane, binding to 30S ribosomes and inhibits protein synthesis by preventing access of aminoacyl tRNA to the acceptor site on the mRNA-ribosome complex. It also binds to the bacterial 50S ribosomal subunit, altering the membrane and causing intracellular components to leak from bacterial cells.	FDA
0.291857	0.46801	Danazol	weak androgen; anterior pituitary suppressant.	FDA
0.29431	0.803245	Cetirizine dihydrochloride	orally active and selective H1-receptor antagonist. Antihistaminic; Piperazines. Non-sedating type histamine H1-receptor antagonist; major metabolite of hydroxyzine. Pharmacological activity resides primarily in the (R)-isomer.	LOPAC
0.294539	0.50449	Sepiapterin	Cofactor of nitric oxide synthase; intracellularly converted to tetrahydro-biopterin leading to the stimulation of nitric oxide.	LOPAC
0.294759	0.541926	Estradiol	The major estrogen secreted by the premenopausal ovary.	FDA
0.295403	0.446629	Idarubicin hydrochloride	Idarubicin hydrochloride	LOPAC
0.295679	0.540239	Alprostadil	stimulates the production of cAMP with resulting intracellular calcium sequestration and subsequent smooth muscle relaxation	FDA
0.29838	0.802964	Stevioside	inhibits transepithelial transport of p-aminohippurate (PAH) by interfering with the organic anion transport system	LOPAC
0.299124	0.466052	Chlorthalidone	thiazide-like diuretic, an inhibitor of the Na+-Cl- cotransporter	FDA
0.299752	0.628797	Cefaclor	second generation cephalosporin with broad spectrum activity against Gram-negative and Gram-positive bacteria. It binds to penicillin-binding proteins and thereby inhibits the cell wall synthesis causing cell death	LOPAC
0.299776	0.589212	Hydroxyurea	Anti-neoplastic. Inactivates ribonucleoside reductase by forming a free radical nitroxide that binds a tyrosyl free radical in the active site of the enzyme. This blocks the synthesis of deoxynucleotides, which inhibits DNA synthesis and induces synchronization or cell death in S-phase.	FDA
0.301299	0.445377	Flurandrenolide	binds to the cytosolic glucocorticoid receptor	FDA
0.301638	0.812994	Pancuronium bromide	Aminosteroidal neuromuscular blocking agent; skeletal muscle relaxant	LOPAC
0.302528	0.5364	(+-)- Norepinephrine (+)bitartrate salt	Adrenergic neurotransmitter	LOPAC
0.302562	0.632363	Levobunolol·HCl	Adrenergic beta-Antagonist.	FDA
0.302857	0.741963	Phosphomycin disodium salt	Antibiotic that concentrates in kidney and bladder; reduces nephrotoxicity and ototoxicity of platinum-containing anti-tumor agents. Fosfomycin is a phosphoenolpyruvate analog that irreversibly inhibits UDP-GlcNAc enolpyruvyl tranferase (MurA), an enzyme involved in bacterial cell wall biosynthesis. As a result, the production of N-acetylmuramic acid, an essential element of the peptidoglycan cel…	LOPAC
0.303416	0.325878	Podophyllotoxin	Inhibits microtubule assembly; antineoplastic.	Natural
0.303455	0.550605	5-(N-Ethyl-N- isopropyl) amiloride	Selective blocker of Na+/H+ antiport	LOPAC
0.304764	0.867594	Clozapine	Atypical antipsychotic compound. Selective antagonist for D4-dopamine receptor. Antagonist at 5-HT2A, 5-HT2C, 5-HT3, 5-HT6, and 5-HT7 serotonin receptors.	FDA
0.3055	0.391252	Acetohexamide	Oral hypoglycemic agent	FDA
0.306957	0.269612	(±)-threo-1-Phenyl-2- decanoylamino-3- morpholino-1- propanol HCl	Glucosylceramide synthase inhibitor; blocks formation of glucosylceramide from ceramide.	LOPAC
0.307306	0.421821	Syringetine-3-glucoside	induces human osteoblast differentiation through bone morphogenetic protein-2/extracellular signal-regulated kinase 1/2 pathway.	Natural
0.307306	0.656701	(±)-Carnitine	Carnitine is a quaternary amine that occurs naturally in most mammalian tissue. It is present in relatively high concentrations in skeletal muscle and heart where it is involved in regulating energy metabolism. It shifts glucose metabolism from glycolysis to glycogen storage and enhances the transport of long chain fatty acids into the mitochondria where they are oxidized for energy production.	Natural
0.307325	0.732537	Pindolol	β1-adrenoceptor antagonist; putative 5-HT1A serotonin receptor agonist; vasodilator.	LOPAC
0.308502	0.447432	Amikacin Disulfate	prevents bacterial protein synthesis by binding to the 30S ribosome subunit and inducing mRNA misreading.	FDA
0.308588	0.564604	Clofazimine	prevents neutrophil motility and lymphocyte transformation. It has anti-inflammatory effect, which is used to treat discoid lupus erythematosus	FDA
0.30896	0.766164	Ketoconazole	CYP3A4 inhibitor; antifungal	LOPAC
0.309297	0.529297	5-azacytidine	A potent growth inhibitor and cytotoxic agent; inhibits DNA methyltransferase, an important regulatory mechanism of gene expression, gene activation and silencing.	LOPAC
0.310626	0.559418	Guanidine·HCl	acts by enhancing the release of acetylcholine following a nerve impulse	FDA
0.311492	0.386035	Chenodiol (Chenodeoxycholic Acid)	a bile acid synthesized in the liver from cholesterol.	FDA
0.313405	0.777584	Quetiapine Fumarate	atypical antipsychotic, a combined serotonin (5HT2) and dopamine (D2) receptor antagonist.	FDA
0.313605	0.350714	1-Amino-1- cyclohexane carboxylic acid hydrochloride		LOPAC
0.314289	0.904338	Meclofenamic acid sodium salt	Meclofenamic acid (MFA) is a nonsteroidal anti-inflammatory, analgesic and antipyretic drug. It inhibits prostaglandin biosynthesis pathway and finds its application in the treatment of postoperative and traumatic inflammation and swelling. MFA functions in opening the potassium voltage-gated channel subfamily Q member 2/member 3 (KCNQ2/Q3).[4] Cyclooxygenase (IC50 = 0.6 μM) and 5-lipoxygenase (I…	LOPAC
0.315939	0.593098	Cefpodoxime Proxetil	Cefpodoxime proxetil is the esterified prodrug of cefpodoxime, a third-generation cephalosporin antibiotic with broad spectrum activity against most Gram-positive and Gram-negative bacteria. It inhibits bacterial cell wall synthesis by binding penicillin-binding proteins, preferentially penicillin binding protein 3, and resulting in the inhibition of peptidoglycan synthesis. Cefpodoxime is stable…	FDA
0.316836	0.868736	Amiodarone·HCl	Non-selective ion channel blocker with broad fungicidal activity. Amiodarone induces an immediate influx of Ca2+ in Saccharomyces cerevisiae, followed by mitochondrial fragmentation and cell death.	FDA
0.317803	0.521706	(+)-Quisqualic acid	Active enantiomer of quisqualic acid; excitatory amino acid at glutamate receptors.	LOPAC
0.31926	0.560413	Atreleuton	reversible 5-lipoxygenase inhibitor. Atreleuton exhibits potent and selective inhibition of leukotriene formation both in vitro and in vivo.	LOPAC
0.320799	0.641544	Histamine dihydrochloride	Histamine dihydrochloride is a derivative of histamine.[1] It prevents the formation of ROS (reactive oxygen species), which inhibits the activation of T cells and natural killer cells.[2] Histamine dihydrochloride is implicated in tumor cell apoptosis.[1] It prevents the relapse of acute myeloid leukemia in patients	LOPAC
0.321323	0.786609	R(+)-IAA-94	inhibitor of chloride channels	LOPAC
0.321858	0.499768	Tamoxifen Citrate	Protein kinase C inhibitor. Induces apoptosis in human malignant glioma cell lines. Tamoxifen and its metabolite 4-hydroxytamoxifen are selective estrogen response modifiers (SERMs) that act as estrogen antagonists in mammary gland. Blocks estradiol-stimulated VEGF production in breast tumor cells.	FDA
0.32275	0.788083	Cisplatin	Potent chemoimmunotherapeutic drug; stimulates the immune responses by activating macrophages and other cells of the immune system. Cisplatin-treated macrophages show increased antigen presentation function in vitro. Treatment increased cellular NF-κB content and translocation in macrophages. Cisplatin effects are regulated by kinases, phosphatases, and Ca2+/calmodulin. Forms cytotoxic adducts wi…	LOPAC
[truncated: 662 more rows]
