# Supplementary material for: Epigenetic Small Molecules Rescue Nucleocytoplasmic Transport and DNA Damage Phenotypes in C9ORF72 ALS/FTD
Source: Brain Sci. 2021 Nov 20;11(11):1543. doi: 10.3390/brainsci11111543 (PMC8616043; doi:10.3390/brainsci11111543)
Supplement: Supplementary file 1 [file brainsci-11-01543-s001.zip › Table S5.xlsx]

## Sheet: Stats
Table S5. p-values for statistical tests for Figure 6
C9ALS MNs + DMSO	vs Isogenic + DMSO	vs 200 μM etoposide	vs 10 μM Na-4-Phenylbutyrate	vs 1 μM CTPB	vs 5 nM Quisinostat	vs 1 nM CAY10603	vs 1 μM EPZ-6438	vs 1 μM Piceatanol
C9ALS-1	<0.0001	<0.0001	0.001458	0.001775	0.001983	0.005735	0.002982	0.001801
C9ALS-2	<0.0001	<0.0001	0.041195	0.396516	0.116437	0.203061	0.179643	0.002359
C9ALS-3	0.0206	<0.0001	0.009948	0.025471	0.110357	0.062582	0.021736	0.012317
All three C9ALS MNs	<0.0001		<0.0001	<0.0001	<0.0001	0.0026	0.7345	<0.0001
Differences between C9ALS MN + DMSO, Isogenic + DMSO, and etoposide treatment yH2AX levels were calculated by One-way ANOVA with multiple comparisons using Sidak's correction. Differences between individual C9ALS MN + DMSO and treatments' yH2AX levels were calculated by Student's t-test, one-tailed distribution with unpaired, unequal variance. Differences between all three (grouped) C9ALS MN + DM…							*
							**
							***
							****
