# Supplementary figures and images for: Epigenetic Small Molecules Rescue Nucleocytoplasmic Transport and DNA Damage Phenotypes in C9ORF72 ALS/FTD
Source: MDPI journal article supplement (doi:10.3390/brainsci11111543), 2021-11-20

# Assay Robustness

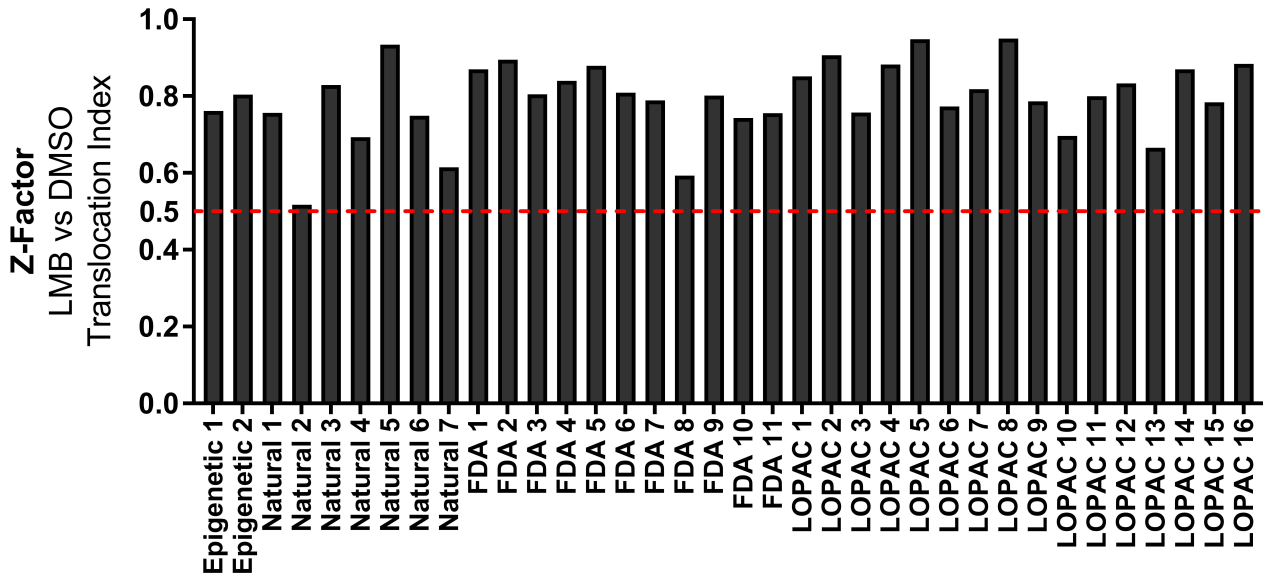

Supplement: s1 [file s1]

**A**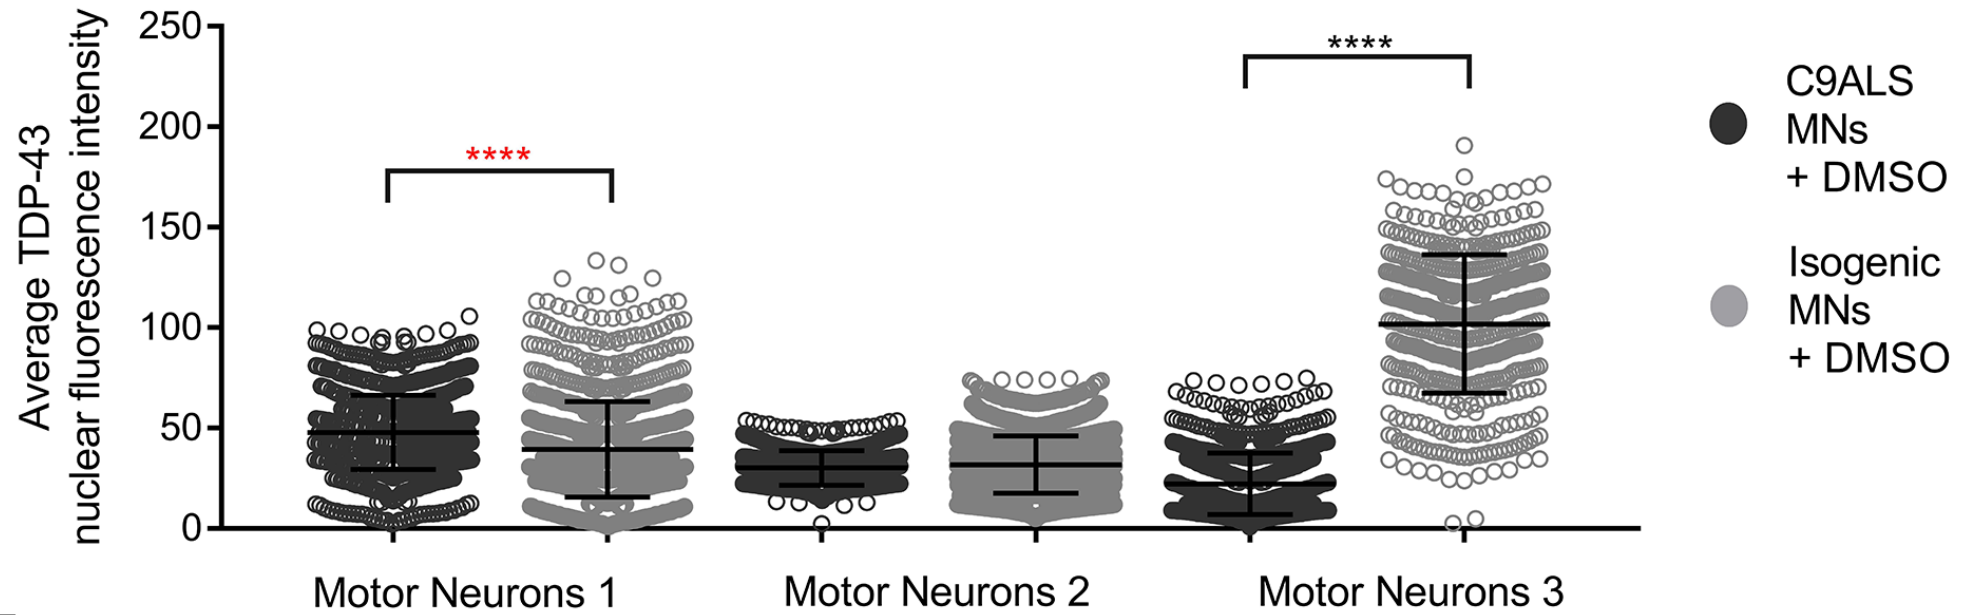**B**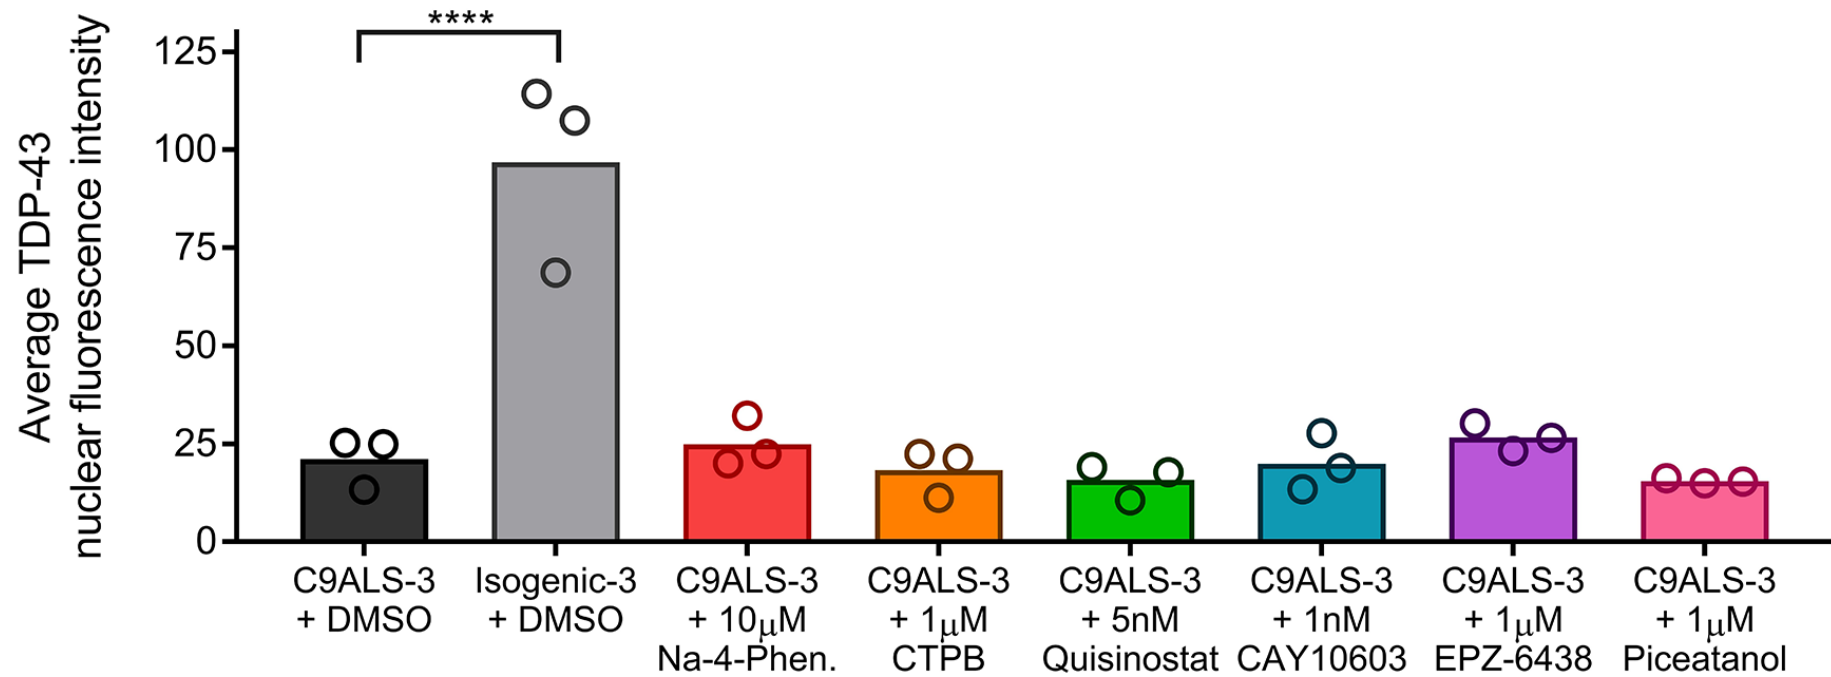

Supplement: s1 [file s1]

NLS

GFP

NES

Created with SnapGene®

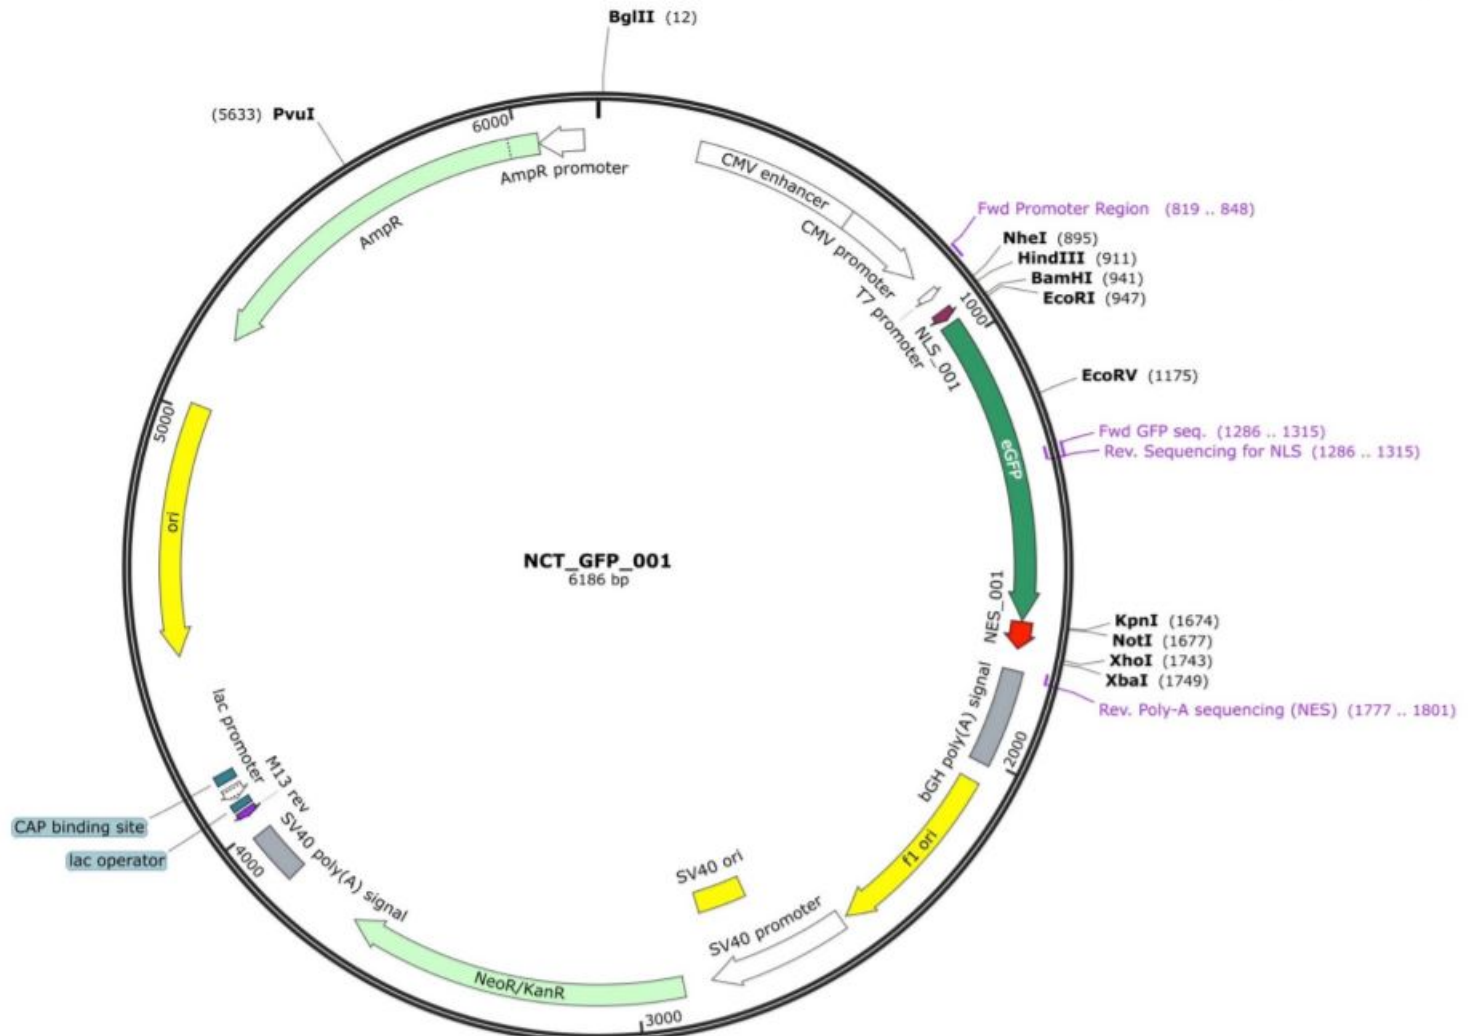

Supplement: s1 [file s1]

**Figure S1. Confirmation of motor neuron markers in iPSC-derived motor neurons**

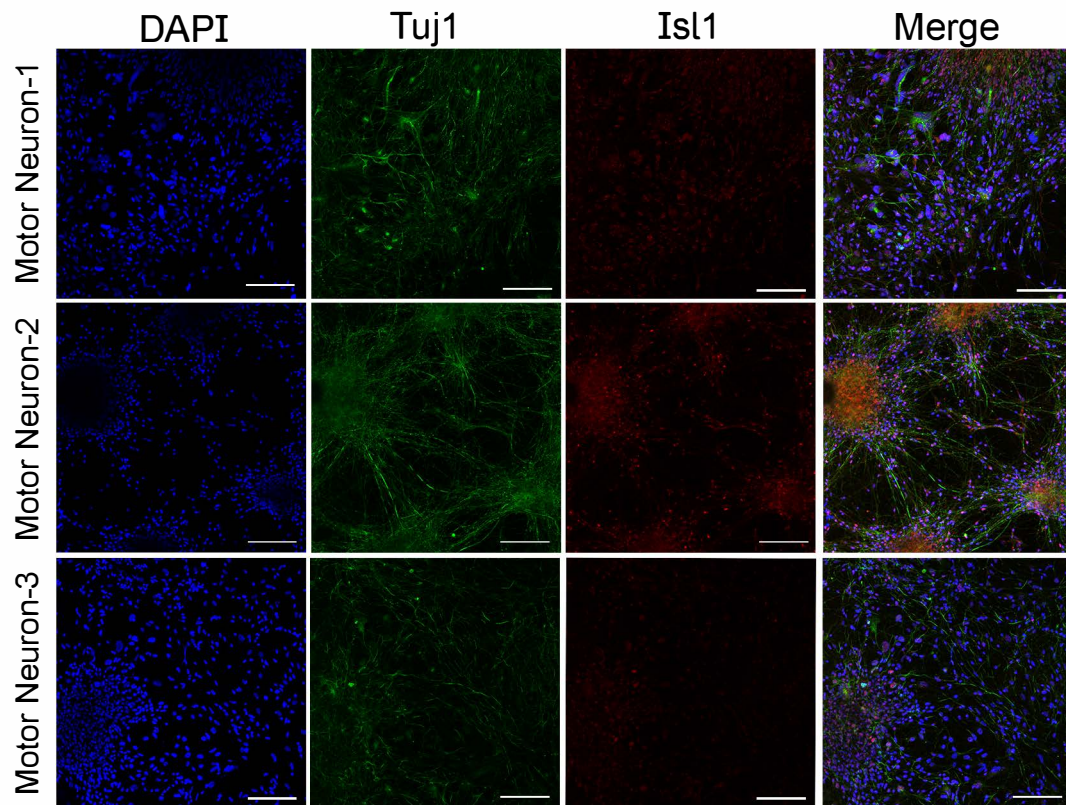

Supplement: s1 [file s1]

Translocation Index of PR  
Normalized to DMSO (0)  
and PR (1)

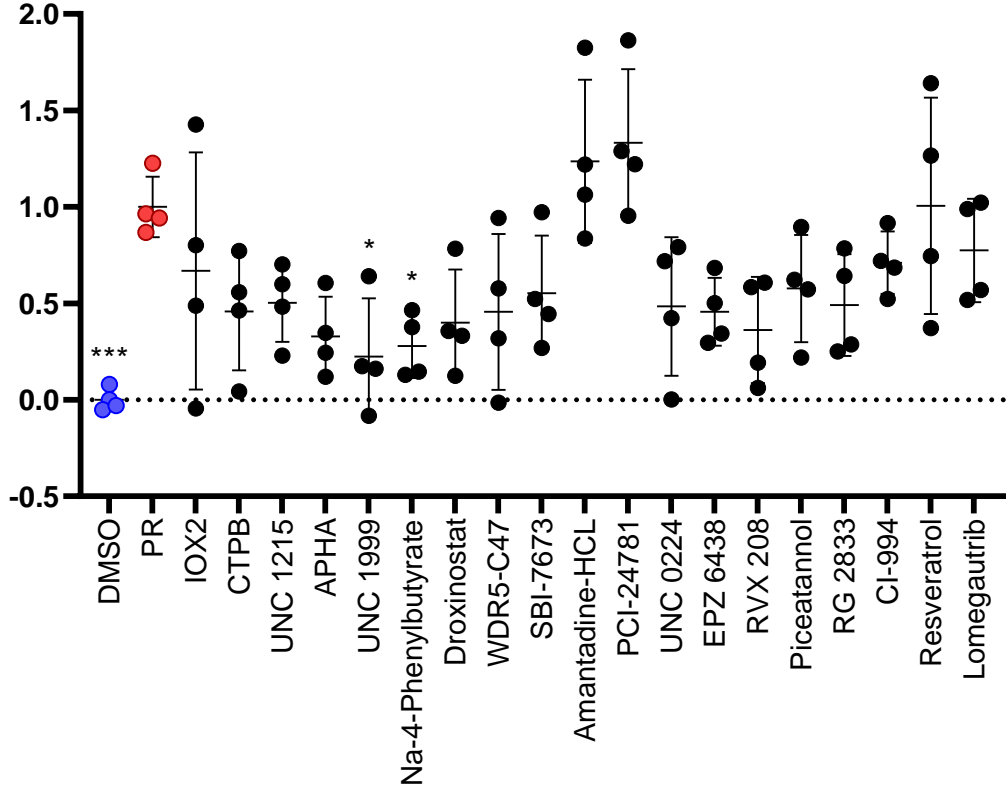

Supplement: s1 [file s1]

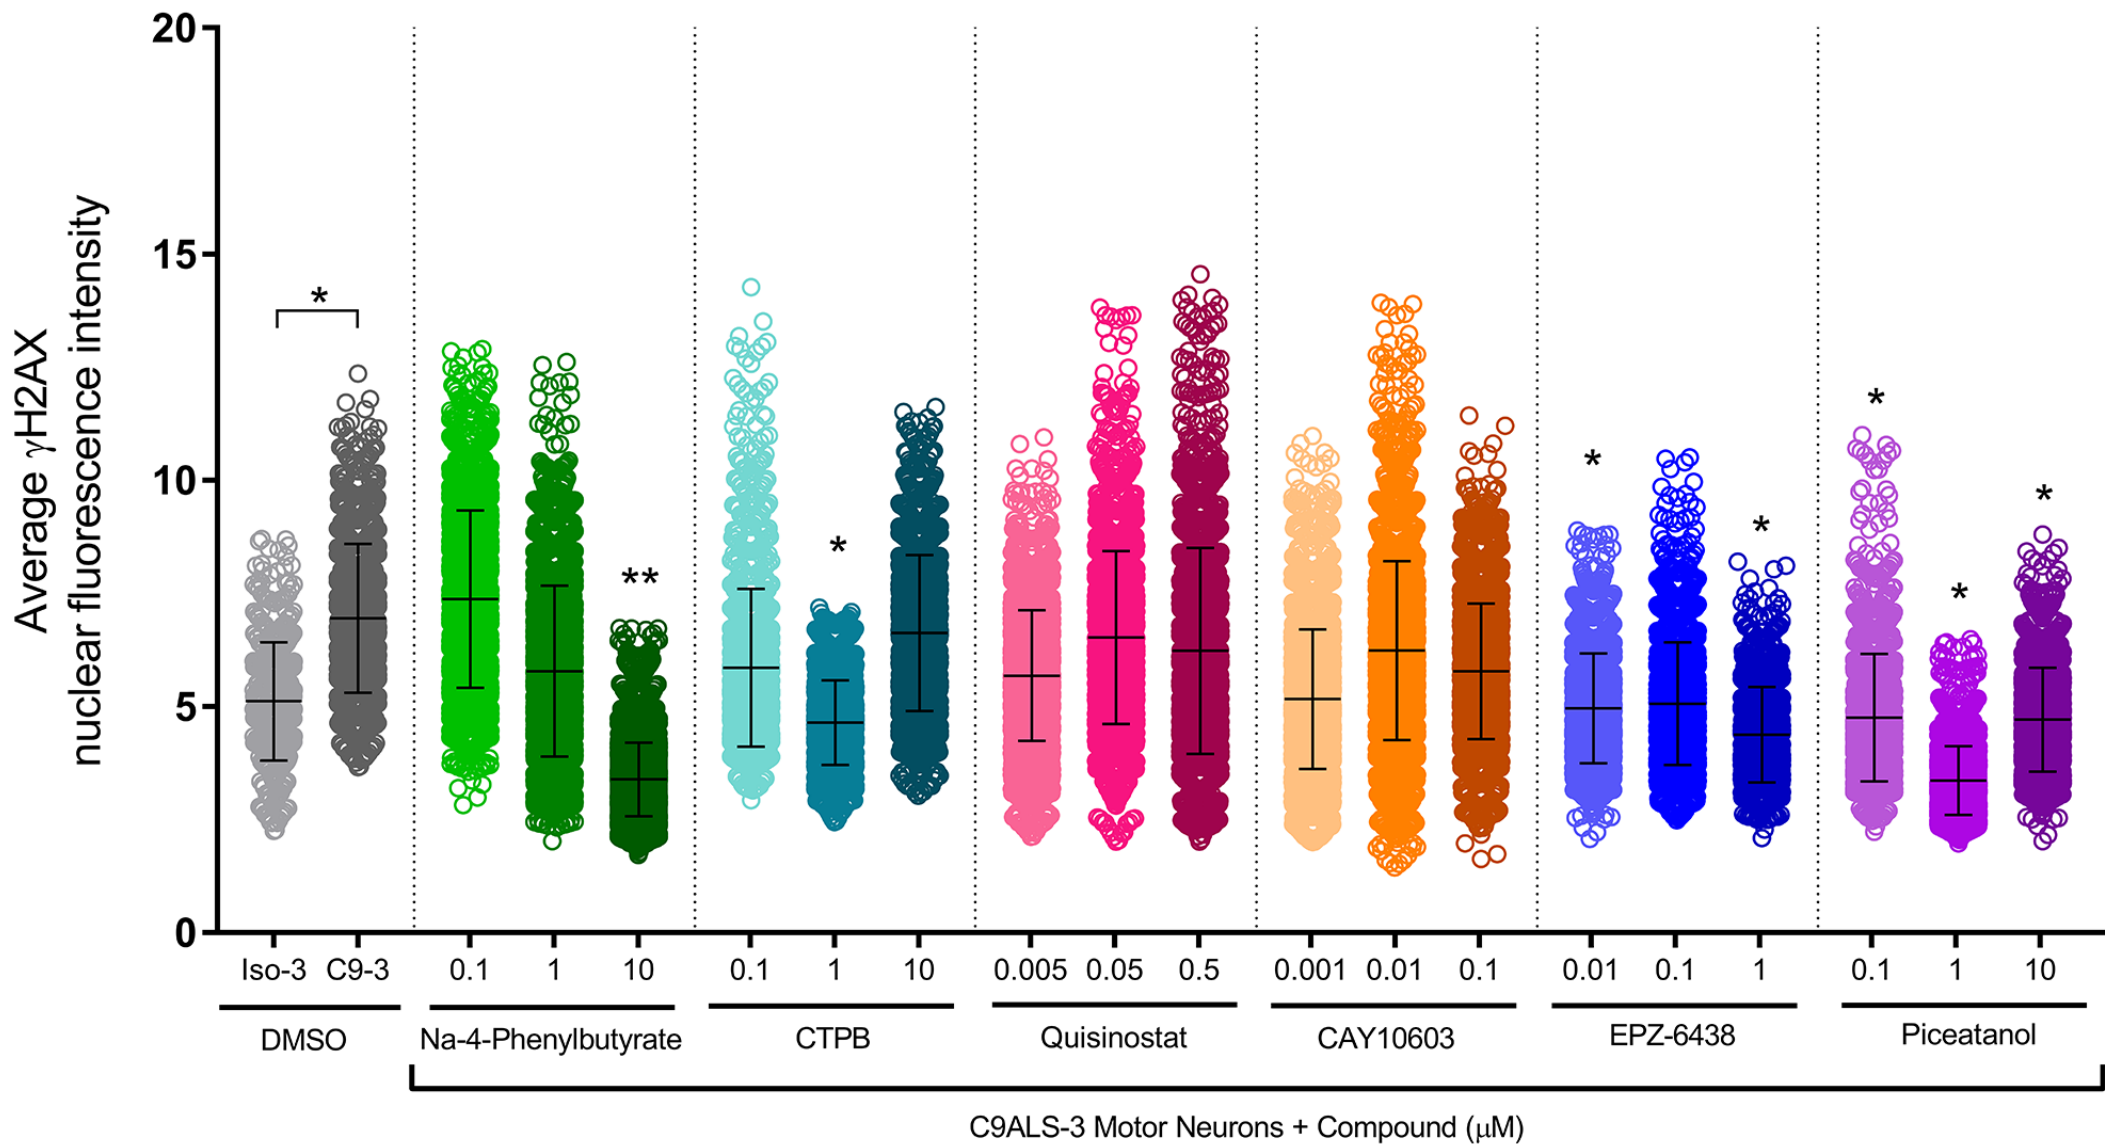

Supplement: s1 [file s1]

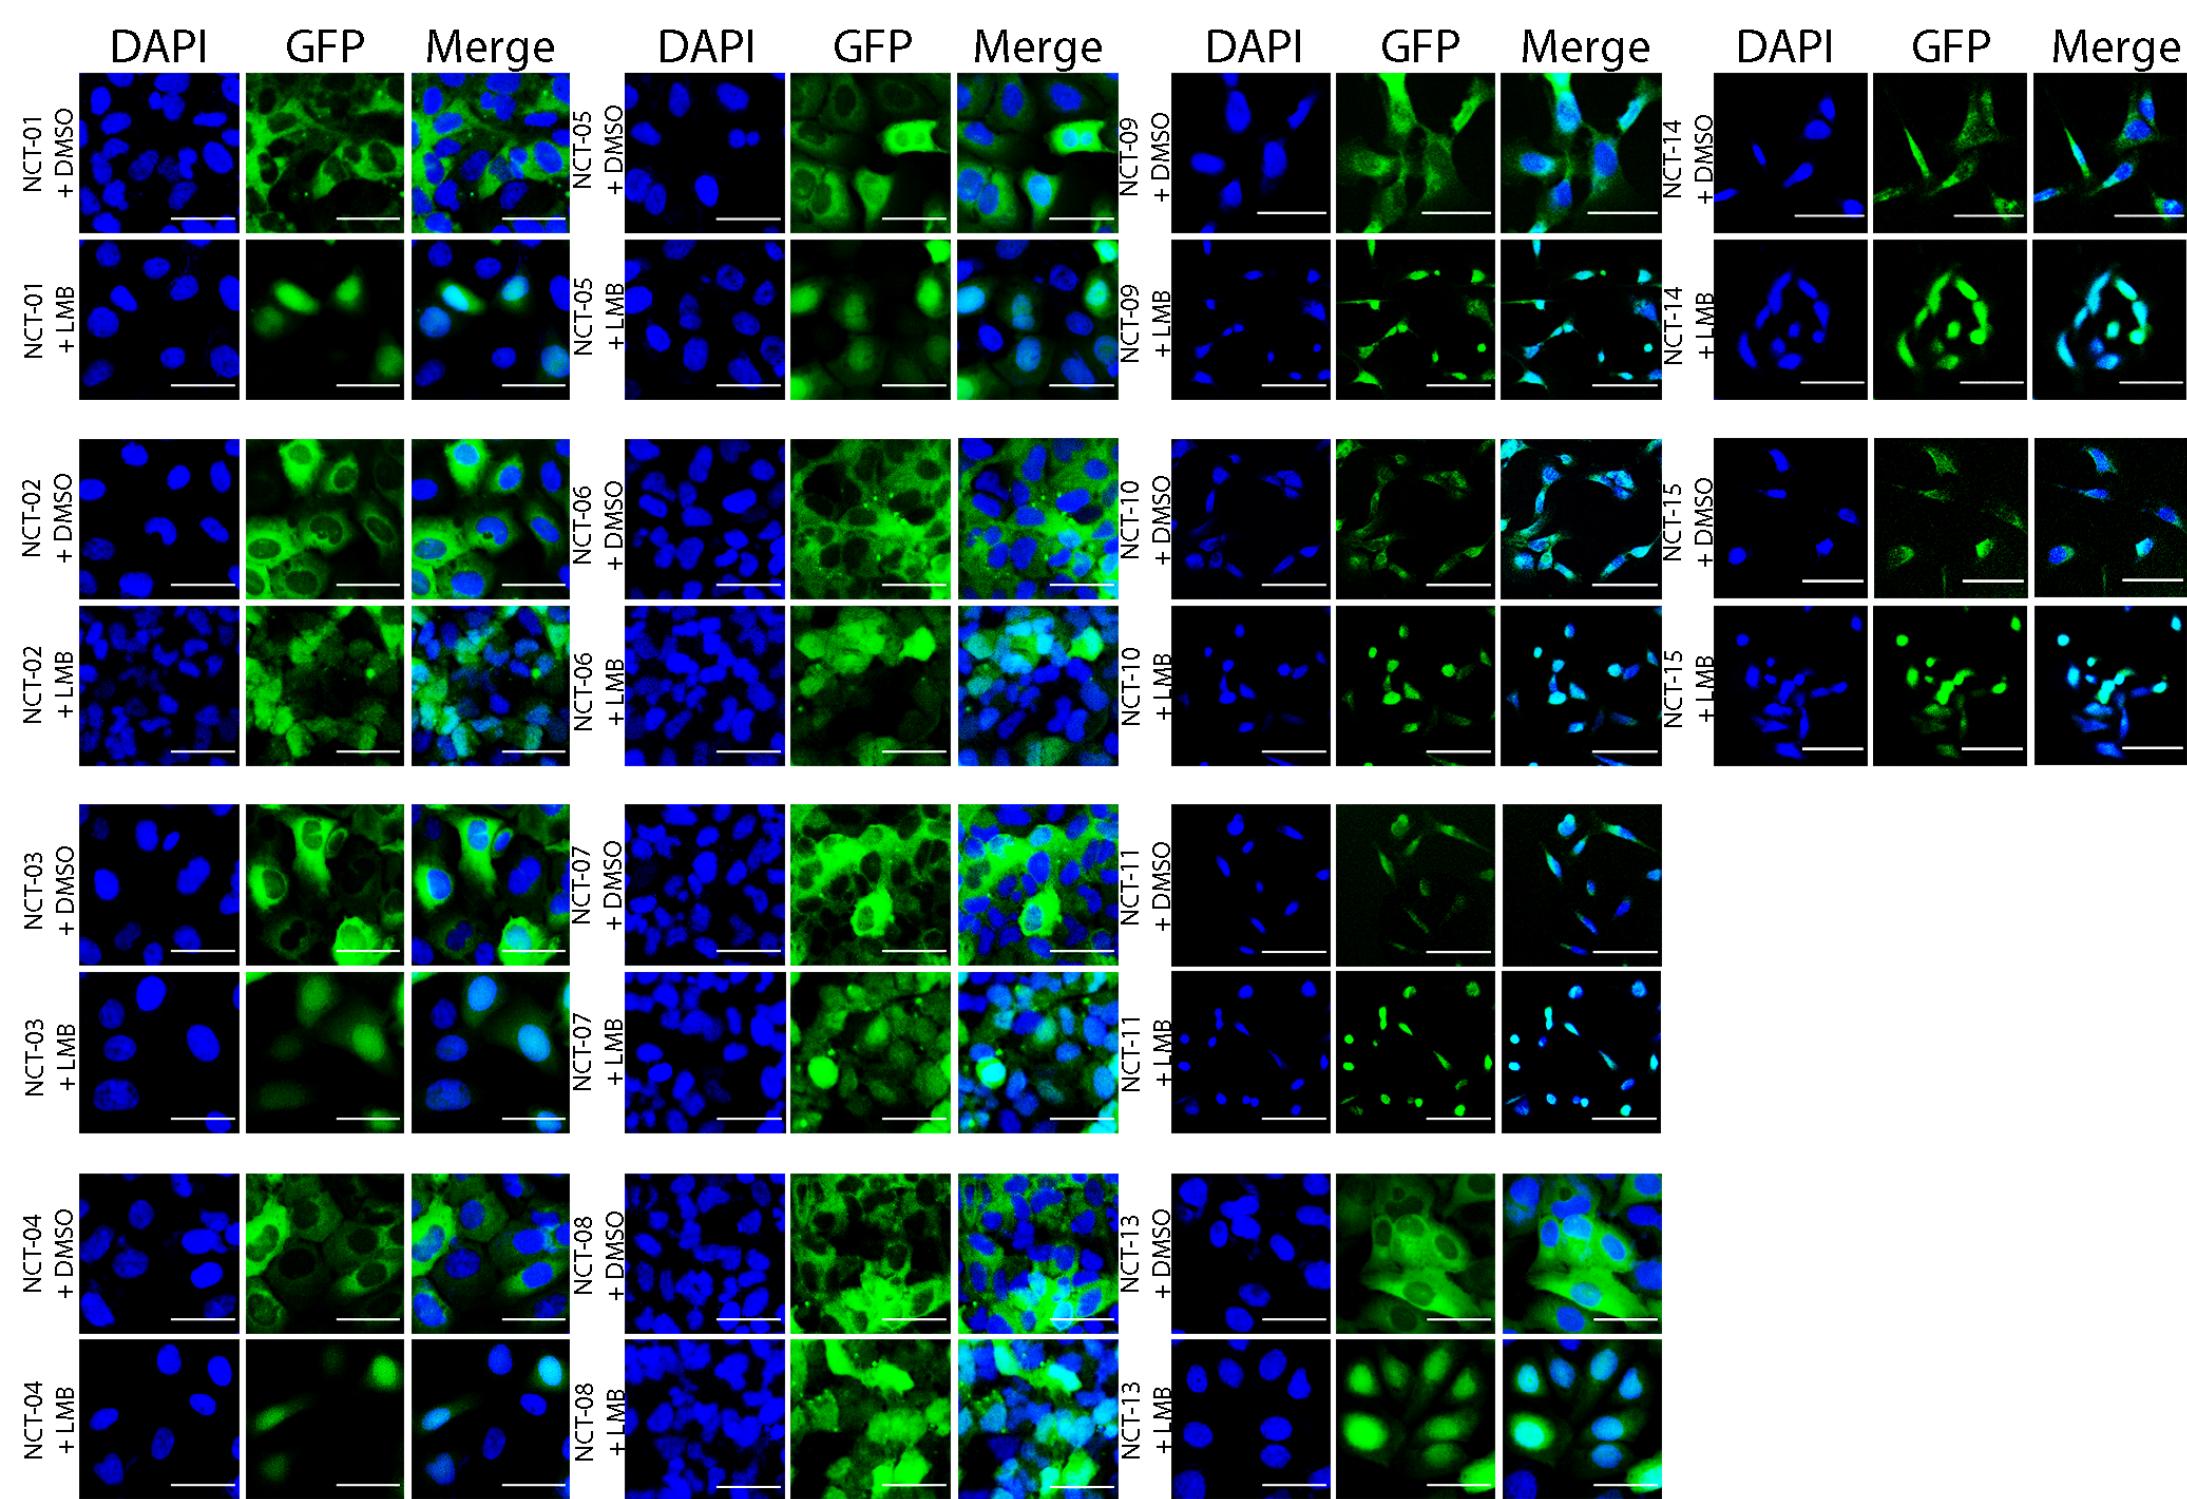

Supplement: s1 [file s1]

**A**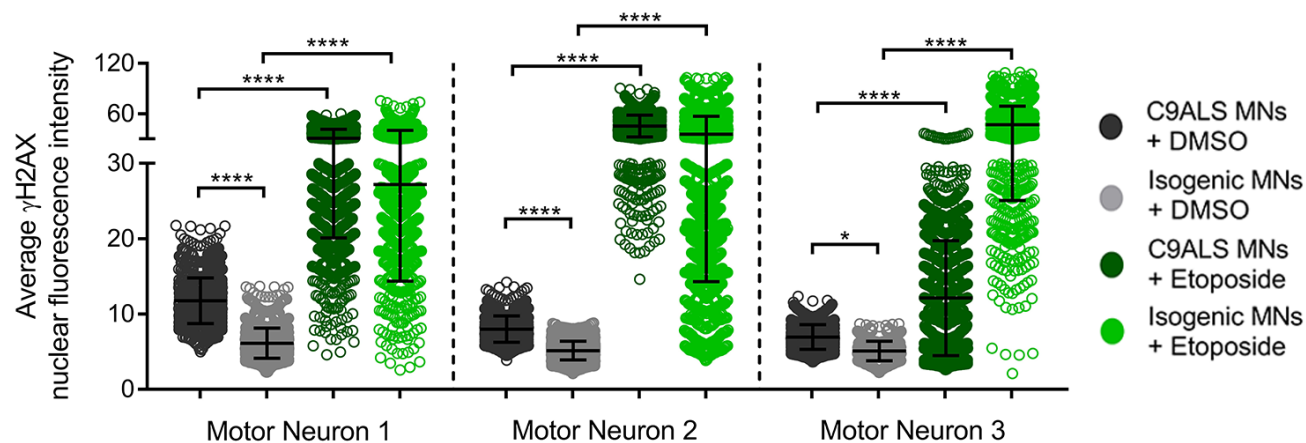**B**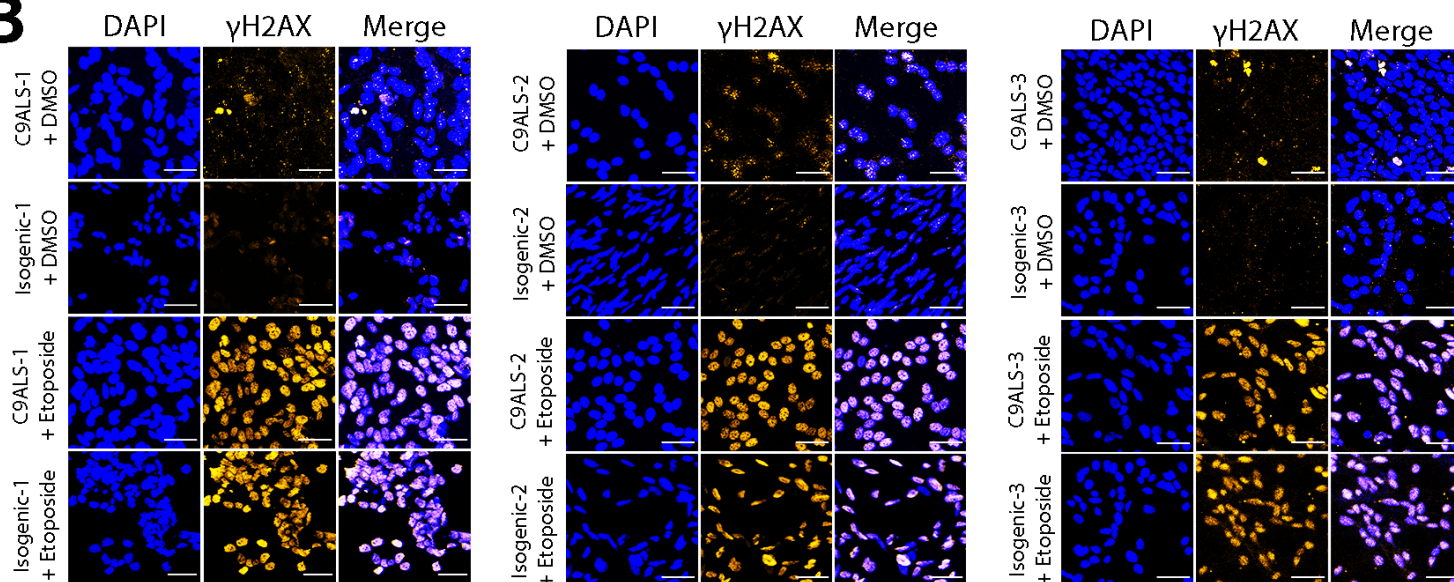**C**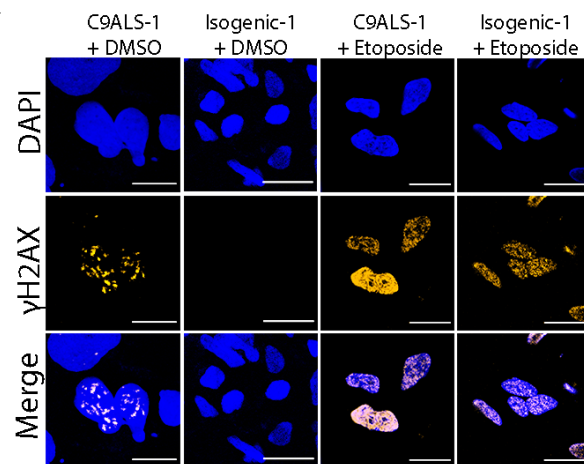

Supplement: s1 [file s1]
